# Supplementary material for: Genetic Predisposition to Sporadic Congenital Hearing Loss in a Pediatric Population
Source: PubMed Central journal article supplement (PMC5382691; doi:10.1038/srep45973), 2017-04-06
Supplement: srep45973-s1.pdf [file srep45973-s1.pdf]

# **Genetic Predisposition to Sporadic Congenital Hearing Loss in a Pediatric Population**

Jinsei Jung<sup>1,†</sup>, Joon Suk Lee<sup>2, †</sup>, Kyeong Jee Cho<sup>2</sup>, Seyoung Yu<sup>2</sup>, Joo-Heon Yoon<sup>1</sup>, Heon Yung Gee<sup>2</sup>, and Jae Young Choi<sup>1</sup>

<sup>1</sup>Department of Otorhinolaryngology, Brain Korea 21 PLUS Project for Medical Sciences, Yonsei University College of Medicine, Seoul 03722, Korea

<sup>2</sup>Department of Pharmacology, Brain Korea 21 PLUS Project for Medical Sciences, Yonsei University College of Medicine, Seoul 03722, Korea

†these authors contributed equally to this work

## **Supplementary Information**

Supplementary Figures S1-5

Supplementary Tables S1-8

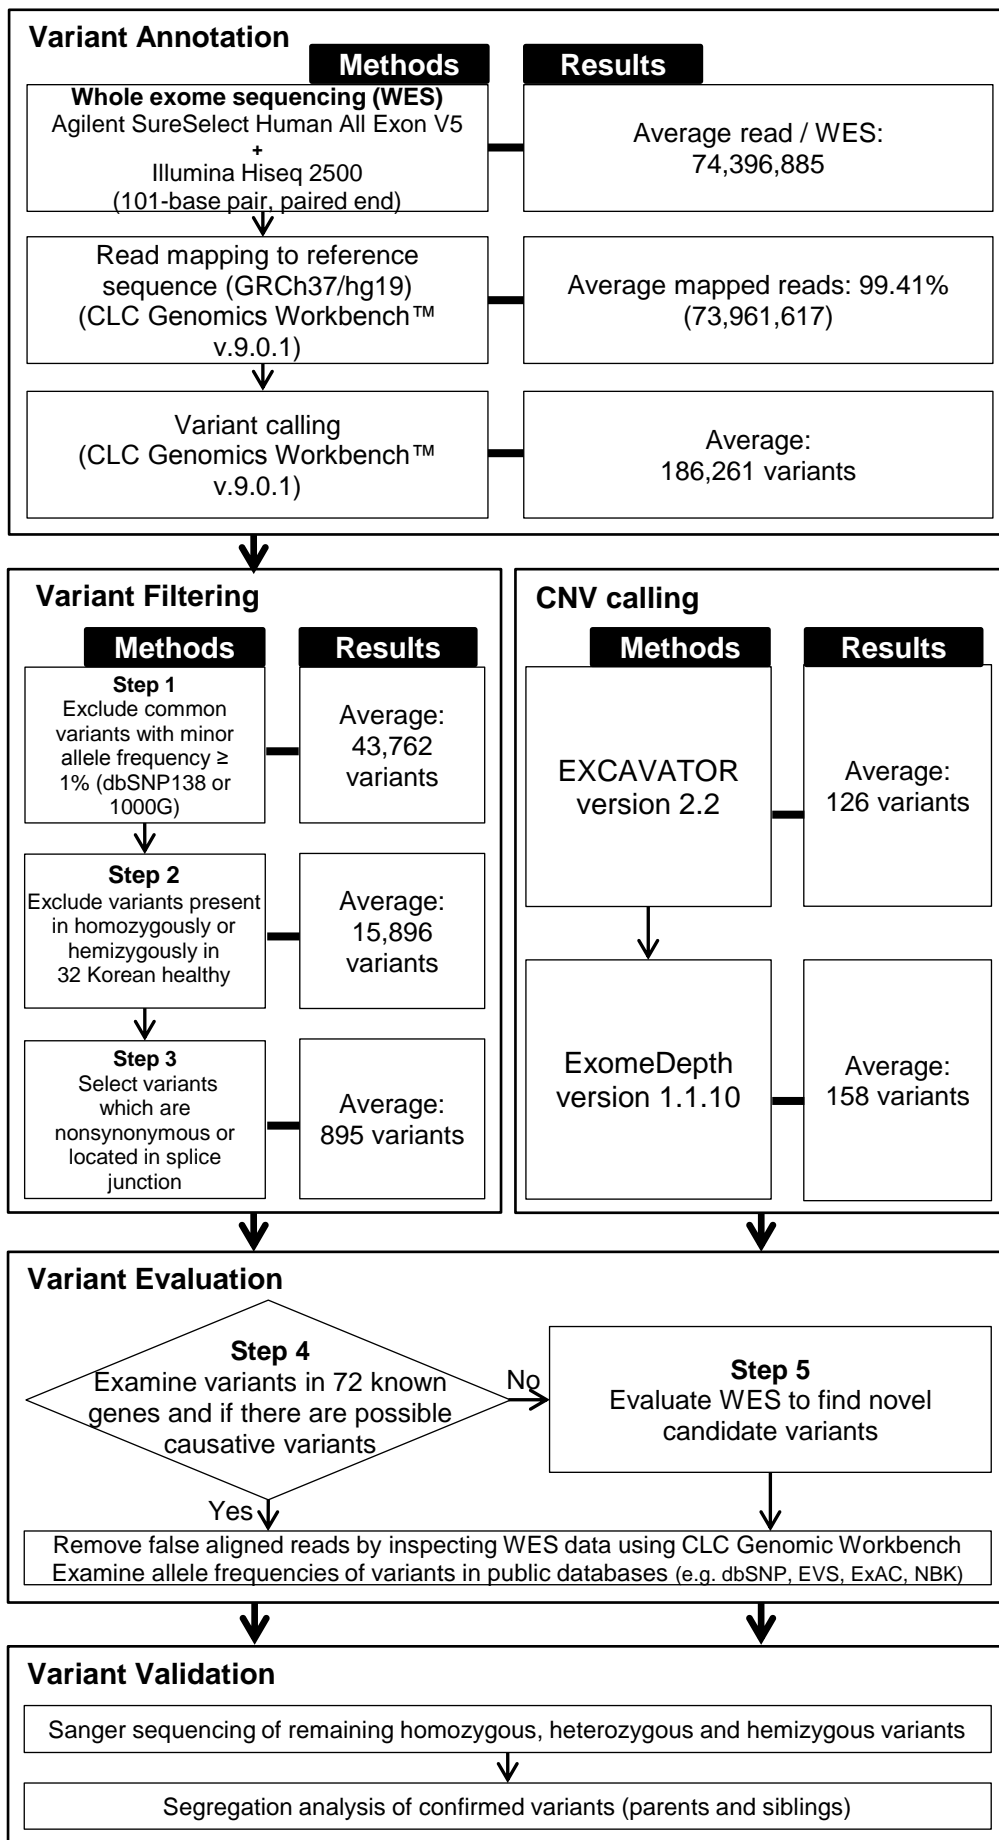

**Figure S1. Variant filtering process for the identification of causative mutations.**

**a** MYO15A (n = 2)

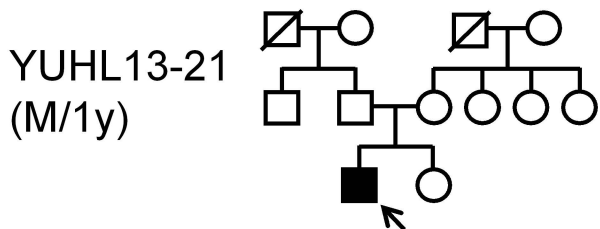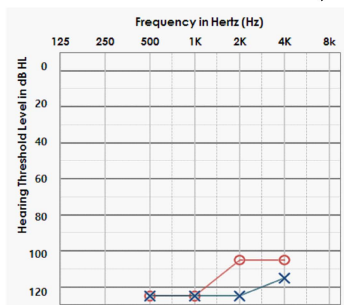

**b** CDH23 (n = 1)

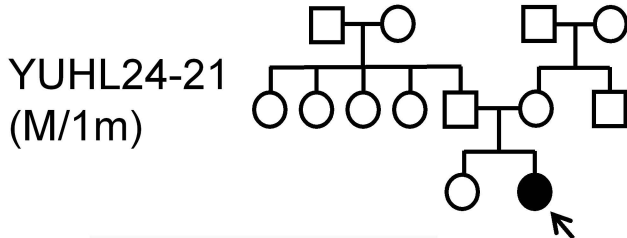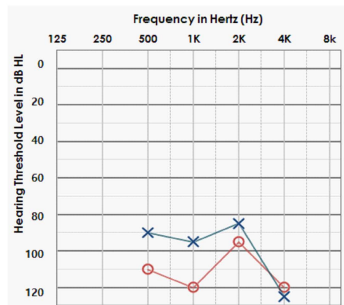

**c** Unknown (n = 12)

YUHL44-21(M/2y)

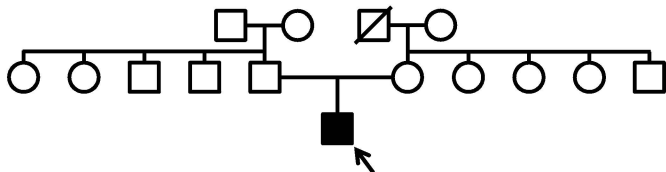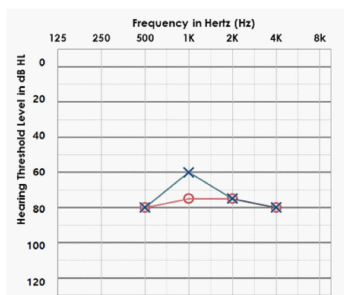

YUHL10-21  
(M/4y)

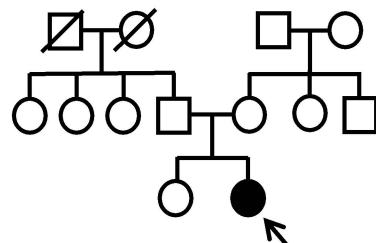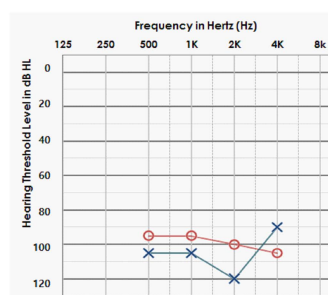

**Figure S2. Family pedigree and audiologic phenotype of families included in WES study.**

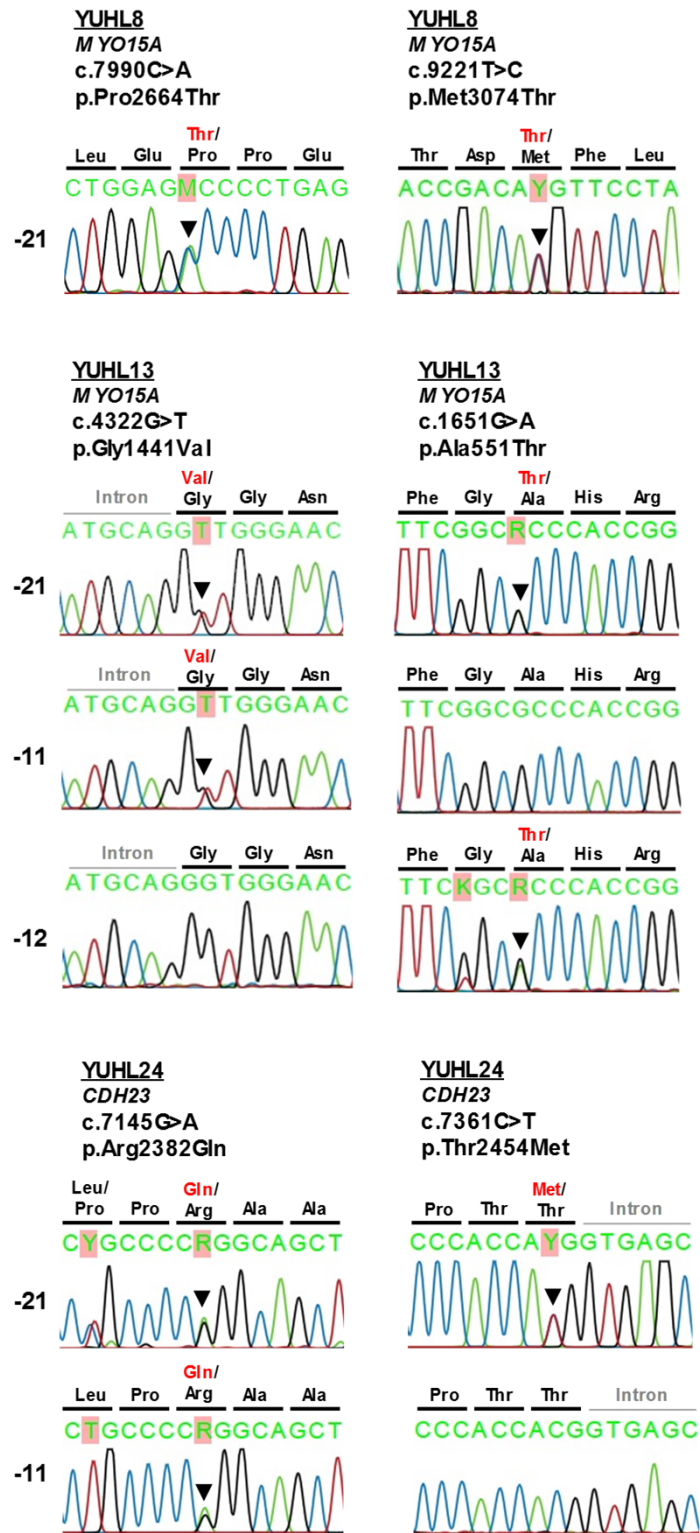

**Figure S3. Sequencing traces of mutations detected in *MYO15A* and *CDH23*.**

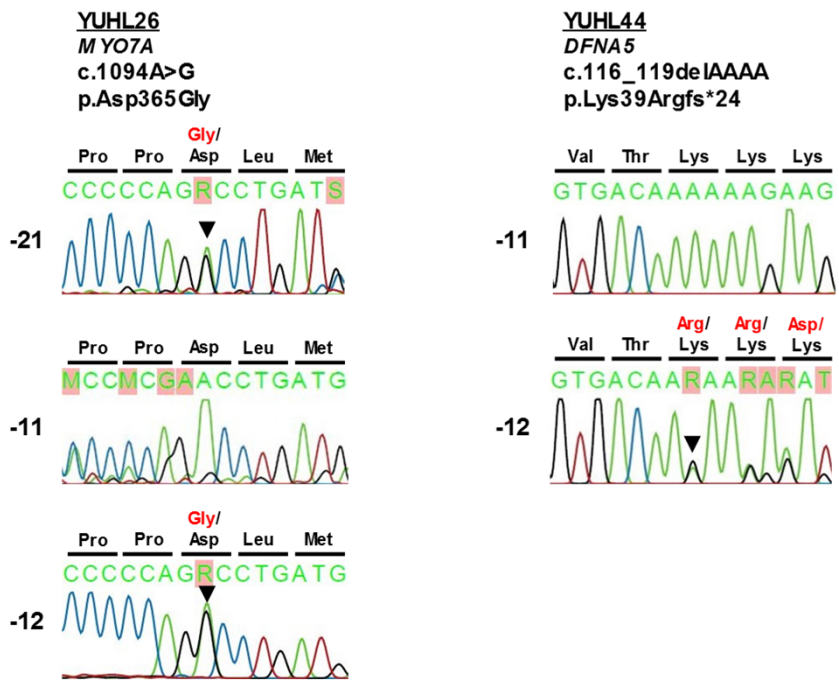

**Figure S4. Sequencing traces of mutations detected in MYO7A and DFNA5.**

**a**  
YUHL10-21  
chr6:30995156..30996641

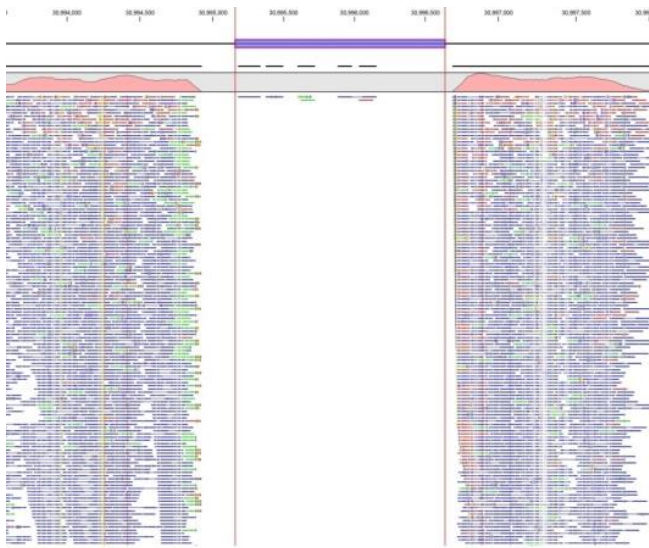

**b**  
YUHL25-21  
chr6:30995156..30996641

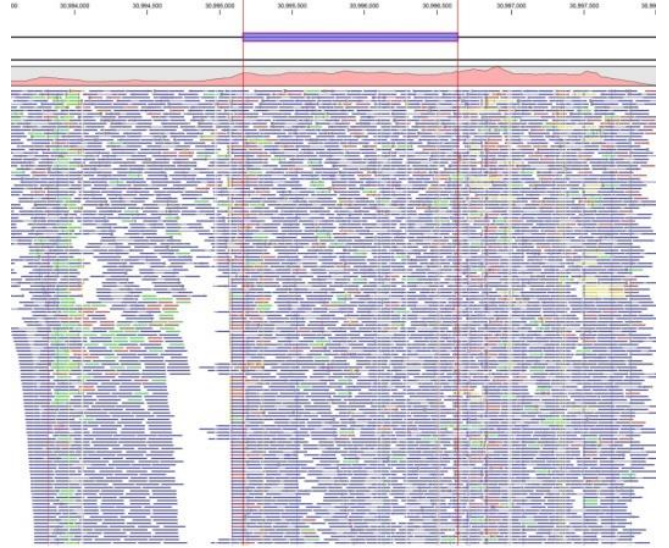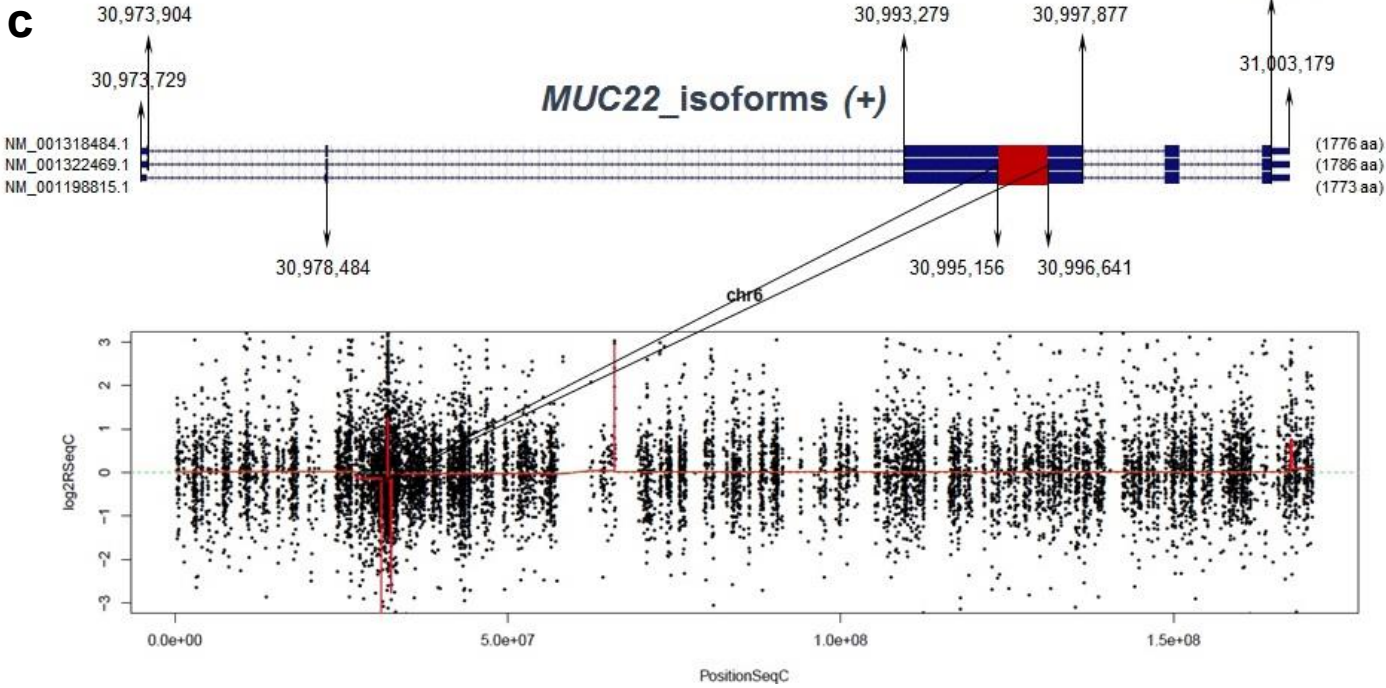

Figure S5. Copy number variation.

**Table S1.** Primer sequences for Sanger's sequencing of *SLC26A4* and *GJB2*

|                |       |            |                                       |
|----------------|-------|------------|---------------------------------------|
| <b>SLC26A4</b> | Ex1-1 | sense      | 5'-CCCCTGCGTGGCAGCC-3'                |
|                |       | anti-sense | 5'-GTCTTTCCCAACCGATCCTATC-3'          |
|                | Ex1-2 | sense      | 5'-TGCAGGAGGGGTAGGATTTCTTT-3'         |
|                |       | anti-sense | 5'-TGTGGGCATCTTCAGGGCGAA-3'           |
|                | Ex2-1 | sense      | 5'-CTCCCTCCTCGCTGTCCTC-3'             |
|                |       | anti-sense | 5'-GCCGCGACACCATGTAGCT-3'             |
|                | Ex2-2 | sense      | 5'-GCCGCAGCTCCCCGAGTA-3'              |
|                |       | anti-sense | 5'-GCTCCGCTTCTCTCTACGC-3'             |
|                | Ex3   | sense      | 5'-TTGGTTGTGACTGAGATTGGATTG-3'        |
|                |       | anti-sense | 5'-GGAGACCAGAACTCTCAATCTG-3'          |
|                | Ex4-1 | sense      | 5'-TGAATGTAATCACTTTGCATGTGC-3'        |
|                |       | anti-sense | 5'-AACATGAGCAAATATAATTGTAATAATAC-3'   |
|                | Ex4-2 | sense      | 5'-TATCCTGACATACTTTATCTTTGGAA-3'      |
|                |       | anti-sense | 5'-AACATGAGCAAATATAATTGTAATAATAC-3'   |
|                | Ex5-1 | sense      | 5'-TGATTAATAACTGATTAATTGTTAGAGAC-3'   |
|                |       | anti-sense | 5'-TATCATAGTAGTATTTAATACAGTTCCATT-3'  |
|                | Ex5-2 | sense      | 5'-CGAACACTTTCTCGTATCCAGCA-3'         |
|                |       | anti-sense | 5'-TACATCCATCTATATTTACTTGTAAGTTC-3'   |
|                | Ex6   | sense      | 5'-AAACATTTAATTTTTCTTTCTTTTCCTTATC-3' |
|                |       | anti-sense | 5'-CCCTGGAGCAAGAAGCAACAC-3'           |
|                | Ex7   | sense      | 5'-AGCAGCAGGAAGTATATAAAATTATTTTC-3'   |
|                |       | anti-sense | 5'-TGCTGAACTTTCTAACTACATATTCTAC-3'    |
|                | Ex8   | sense      | 5'-ATTATTAACCAATGGAGTTTTTAACATC-3'    |
|                |       | anti-sense | 5'-TATTAGTACTAAGAGGAACACCAC-3'        |
|                | Ex9-1 | sense      | 5'-GTCAAATCTTCACAGCATTTTTTCAC-3'      |
|                |       | anti-sense | 5'-TGCAGCCAGCATCTCCGAGAA-3'           |
|                | Ex9-2 | sense      | 5'-CTGAACTTCCACCTGTGAGCT-3'           |
|                |       | anti-sense | 5'-TTCCAGCCCTATAAAACCAGTTC-3'         |
|                | Ex10  | sense      | 5'-ATCGTTGTCATCCAGTCTCTTCC-3'         |
|                |       | anti-sense | 5'-ATGGATATCATAAGGCTGTTGTTCC-3'       |

|             |            |                                           |                                            |
|-------------|------------|-------------------------------------------|--------------------------------------------|
|             | Ex11       | sense                                     | 5'-GAGAAGGACGAATCCTTTTCATAG-3'             |
|             |            | anti-sense                                | 5'-AATCGGTATGCAGAGAAGCAGG-3'               |
|             | Ex12       | sense                                     | 5'-TTCCCTGAATAACACAGCCTTCTC-3'             |
|             |            | anti-sense                                | 5'-GAAGCATATAAGAACCAAATCTTATTTTC-3'        |
|             | Ex13       | sense                                     | 5'-ACATTAATATAATTCTTTTCATTTCTATTTTTTTCC-3' |
|             |            | anti-sense                                | 5'-AGTGTGTTGTTCTGTTTATAGGAAATC-3'          |
|             | Ex14       | sense                                     | 5'-CGGCTGTTCCAAAAATCTTGAC-3'               |
|             |            | anti-sense                                | 5'-CCAAGTCCAGCAAATGTCTCAC-3'               |
|             | Ex15       | sense                                     | 5'-TTGAAATTATTTAATCCAGACAATTTTC-3'         |
|             |            | anti-sense                                | 5'-TCTCAAAGAGGTTAGAAAACAAATTTTC-3'         |
|             | Ex16       | sense                                     | 5'-CATTTTAAGTAACTTGACATTTATTTCC-3'         |
|             |            | anti-sense                                | 5'-TAAGGGGGAAAAGAAAGATGTCATC-3'            |
|             | Ex17-1     | sense                                     | 5'-AAATCTTTGACAATTAAGTTGACAGTG-3'          |
|             |            | anti-sense                                | 5'-GGAACGTTCACTTTGACTGGAAG-3'              |
|             | Ex17-2     | sense                                     | 5'-ATAGAGATTCAAGTGGATTGGAATC-3'            |
|             |            | anti-sense                                | 5'-CAAATGTATAATTCAGAAAACCAGAACC-3'         |
|             | Ex18       | sense                                     | 5'-AGGTTGTTAATTGTTACAACTCTCC-3'            |
|             |            | anti-sense                                | 5'-AAGGGCTTACGGGAAAGTCTTAC-3'              |
|             | Ex19-1     | sense                                     | 5'-ACTAACAAAACATTGTGTCTTTCTTTTG-3'         |
|             |            | anti-sense                                | 5'-TAGAAAAGATACATCTGTAGAAAGGTTG-3'         |
|             | Ex19-2     | sense                                     | 5'-ACTAACAAAACATTGTGTCTTTCTTTTG-3'         |
| anti-sense  |            | 5'-CCGTCAAAAAGAATGTGTCCTTTCT-3'           |                                            |
| Ex20        | sense      | 5'-TGCTATTCTATTTCTACCCTGTGTTTC-3'         |                                            |
|             | anti-sense | 5'-ACTCTAATTATTCAAAATGTAATTCAAATATTTTC-3' |                                            |
| Ex21        | sense      | 5'-TTCAGTTGTATCAACACTTTGTTTTCC-3'         |                                            |
|             | anti-sense | 5'-CATTGAGGAAGTTTTGTCTTGATTC-3'           |                                            |
| <b>GJB2</b> | Ex2-1      | sense                                     | 5'-TGGTGTTTGCTCAGGAAGAG-3'                 |
|             |            | anti-sense                                | 5'-TTGTGTAGGTCCACCACAGG-3'                 |
|             | Ex2-2      | sense                                     | 5'-GCCTACCGGAGACATGAGAA-3'                 |
|             |            | anti-sense                                | 5'-GGCCTACAGGGGTTTCAAAT-3'                 |



**Table S2. Filtering process for variants from normal reference sequence (VRS) following whole exome sequencing (WES) in YUHL.**

| Individual                      | Total sequence reads       | Matched Reads (percentage of reads) | Total number of variants detected | <sup>a</sup> dbSNP138 (MAF<1%) | <sup>b</sup> Variants filtered by 32 control | <sup>c</sup> Nonsynonymous and splice variants | % c / a | Located within splice site | Deletion or Insertion | Stop codon gained or lost | Missense     |
|---------------------------------|----------------------------|-------------------------------------|-----------------------------------|--------------------------------|----------------------------------------------|------------------------------------------------|---------|----------------------------|-----------------------|---------------------------|--------------|
| YUHL8-21                        | 56,886,008                 | 56,772,683 ( 99.80% )               | 179,970                           | 49,441                         | 16,540                                       | 1,035                                          | 2.09%   | 76                         | 46                    | 12                        | 901          |
| YUHL10-21                       | 58,952,558                 | 58,843,748 ( 99.82% )               | 175,270                           | 46,130                         | 15,338                                       | 996                                            | 2.16%   | 66                         | 31                    | 11                        | 888          |
| YUHL13-21                       | 88,416,680                 | 88,248,060 ( 99.81% )               | 206,699                           | 53,182                         | 17,689                                       | 762                                            | 1.43%   | 44                         | 38                    | 15                        | 665          |
| YUHL14-21                       | 66,659,216                 | 66,531,054 ( 99.81% )               | 194,398                           | 52,428                         | 17,883                                       | 909                                            | 1.73%   | 55                         | 37                    | 9                         | 808          |
| YUHL20-21                       | 71,029,998                 | 70,889,041 ( 99.80% )               | 190,036                           | 51,104                         | 17,041                                       | 891                                            | 1.74%   | 70                         | 37                    | 8                         | 776          |
| YUHL21-21                       | 78,198,704                 | 77,247,208 ( 98.78% )               | 194,277                           | 53,546                         | 22,538                                       | 874                                            | 1.63%   | 38                         | 55                    | 17                        | 764          |
| YUHL24-21                       | 85,635,052                 | 85,401,914 ( 99.73% )               | 191,531                           | 38,741                         | 9,997                                        | 565                                            | 1.46%   | 38                         | 30                    | 8                         | 489          |
| YUHL25-21                       | 108,081,258                | 107,763,230 ( 99.71% )              | 195,767                           | 39,273                         | 15,217                                       | 898                                            | 2.29%   | 54                         | 77                    | 16                        | 751          |
| YUHL26-21                       | 96,145,100                 | 95,832,419 ( 99.67% )               | 200,817                           | 41,451                         | 16,802                                       | 912                                            | 2.20%   | 74                         | 64                    | 5                         | 769          |
| YUHL36-21                       | 96,689,608                 | 94,539,588 ( 97.78% )               | 194,569                           | 39,346                         | 15,327                                       | 910                                            | 2.31%   | 61                         | 73                    | 17                        | 759          |
| YUHL40-21                       | 58,508,176                 | 58,080,725 ( 99.27% )               | 163,533                           | 34,035                         | 12,587                                       | 910                                            | 2.67%   | 67                         | 65                    | 13                        | 765          |
| YUHL43-21                       | 50,266,852                 | 49,975,337 ( 99.42% )               | 164,309                           | 34,646                         | 16,010                                       | 1,040                                          | 3.00%   | 95                         | 92                    | 11                        | 842          |
| YUHL44-21                       | 51,690,290                 | 51,376,008 ( 99.39% )               | 170,215                           | 35,587                         | 13,677                                       | 929                                            | 2.61%   | 82                         | 63                    | 17                        | 767          |
| Mean value /<br><sup>d</sup> SD | 74,396,885 /<br>19,167,152 | 73,961,617 ( 99.41% )               | 186,261 /<br>14,076               | 43,762 /<br>7,450              | 15,896 /<br>2,967                            | 895 /<br>122                                   | 2.04%   | 63 /<br>17                 | 54 /<br>20            | 12 /<br>4                 | 765 /<br>103 |

<sup>a</sup>Variants which are not common dbSNP138 (MAF<1%)

<sup>b</sup>Variants which are not shared by 32 control of healthy individuals.

<sup>c</sup>Variants which are located in nonsynonymous and splice site

<sup>d</sup>Standard deviation

**Table S3. 72 known NSHL genes examined in this study.**

| #  | Gene symbol     | Gene Name                                                  | Accession #  | MIM-phenotype # | Mode | Coding Exons |
|----|-----------------|------------------------------------------------------------|--------------|-----------------|------|--------------|
| 1  | <i>ACTG1</i>    | actin gamma 1                                              | NM_001199954 | 102560          | AD   | 6            |
| 2  | <i>ADCY1</i>    | adenylate cyclase 1                                        | NM_021116    | 103072          | AR   | 20           |
| 3  | <i>BSND</i>     | barttin CLCNK type accessory beta subunit                  | NM_057176    | 606412          | AR   | 4            |
| 4  | <i>CCDC50</i>   | coiled-coil domain containing 50                           | NM_178335    | 611051          | AD   | 12           |
| 5  | <i>CDH23</i>    | cadherin related 23                                        | NM_022124    | 605516          | AR   | 68           |
| 6  | <i>CEACAM16</i> | carcinoembryonic antigen related cell adhesion molecule 16 | NM_001039213 | 614591          | AD   | 7            |
| 7  | <i>CIB2</i>     | calcium and integrin binding family member 2               | NM_006383    | 605564          | AR   | 6            |
| 8  | <i>CLDN14</i>   | claudin 14                                                 | NM_144492    | 605608          | AR   | 3            |
| 9  | <i>COCH</i>     | cochlin                                                    | NM_004086    | 603196          | AD   | 12           |
| 10 | <i>COL11A2</i>  | collagen type XI alpha 2 chain                             | NM_080680    | 120290          | AD   | 66           |
| 11 | <i>DFNA5</i>    | DFNA5, deafness associated tumor suppressor                | NM_004403    | 608798          | AD   | 10           |
| 12 | <i>DFNB59</i>   | deafness, autosomal recessive 59                           | NM_001042702 | 610219          | AR   | 7            |
| 13 | <i>DIABLO</i>   | diablo IAP-binding mitochondrial protein                   | NM_019887    | 605219          | AD   | 7            |
| 14 | <i>DIAPH1</i>   | diaphanous related formin 1                                | NM_001314007 | 602121          | AD   | 29           |
| 15 | <i>ELMOD3</i>   | ELMO domain containing 3                                   | NM_001135021 | 615427          | AR   | 15           |
| 16 | <i>EPS8</i>     | epidermal growth factor receptor pathway substrate 8       | NM_004447    | 600206          | AR   | 21           |
| 17 | <i>ESPN</i>     | espin                                                      | NM_031475    | 606351          | AR   | 13           |
| 18 | <i>ESRRB</i>    | estrogen related receptor beta                             | NM_004452    | 602167          | AR   | 11           |
| 19 | <i>EYA4</i>     | EYA transcriptional coactivator and phosphatase 4          | NM_004100    | 603550          | AD   | 20           |
| 20 | <i>FAM65B</i>   | family with sequence similarity 65 member B                | NM_014722    | 611410          | AR   | 23           |

|    |                 |                                                                      |              |        |    |    |
|----|-----------------|----------------------------------------------------------------------|--------------|--------|----|----|
| 21 | <i>GIPC3</i>    | GIPC PDZ domain containing family member 3                           | NM_133261    | 608792 | AR | 6  |
| 22 | <i>GJB2</i>     | gap junction protein beta 2                                          | NM_004004    | 121011 | AD | 2  |
| 23 | <i>GPSM2</i>    | G-protein signaling modulator 2                                      | NM_001321039 | 609245 | AR | 16 |
| 24 | <i>GRHL2</i>    | grainyhead like transcription factor 2                               | NM_024915    | 608576 | AD | 16 |
| 25 | <i>GRXCR1</i>   | glutaredoxin and cysteine rich domain containing 1                   | NM_001080476 | 613283 | AR | 4  |
| 26 | <i>GRXCR2</i>   | glutaredoxin and cysteine rich domain containing 2                   | NM_001080516 | 615762 | AR | 3  |
| 27 | <i>HGF</i>      | hepatocyte growth factor                                             | NM_000601    | 142409 | AR | 18 |
| 28 | <i>HOMER2</i>   | homer scaffolding protein 2                                          | NM_199330    | 604799 | AD | 9  |
| 29 | <i>ILDR1</i>    | immunoglobulin like domain containing receptor 1                     | NM_001199799 | 609739 | AR | 8  |
| 30 | <i>KARS</i>     | lysyl-tRNA synthetase                                                | NM_001130089 | 601421 | AR | 15 |
| 31 | <i>KCNQ4</i>    | potassium voltage-gated channel subfamily Q member 4                 | NM_004700    | 603537 | AD | 14 |
| 32 | <i>LHFPL5</i>   | lipoma HMGIC fusion partner-like 5                                   | NM_182548    | 609427 | AR | 4  |
| 33 | <i>LOXHD1</i>   | lipoxygenase homology domains 1                                      | NM_144612    | 613072 | AR | 40 |
| 34 | <i>LRTOMT</i>   | leucine rich transmembrane and O-methyltransferase domain containing | NM_001145309 | 612414 | AR | 9  |
| 35 | <i>MARVELD2</i> | MARVEL domain containing 2                                           | NM_001038603 | 610572 | AR | 7  |
| 36 | <i>MET</i>      | MET proto-oncogene, receptor tyrosine kinase                         | NM_001127500 | 164860 | AR | 21 |
| 37 | <i>MIR96</i>    | microRNA 96                                                          | NR_029512    | 611606 | AD | 1  |
| 38 | <i>MSRB3</i>    | methionine sulfoxide reductase B3                                    | NM_001193460 | 613719 | AR | 8  |
| 39 | <i>MYH14</i>    | myosin heavy chain 14                                                | NM_001145809 | 608568 | AD | 43 |
| 40 | <i>MYH9</i>     | myosin heavy chain 9                                                 | NM_002473    | 160775 | AD | 41 |
| 41 | <i>MYO15A</i>   | myosin XVA                                                           | NM_016239    | 602666 | AR | 65 |
| 42 | <i>MYO3A</i>    | myosin IIIA                                                          | NM_017433    | 606808 | AR | 35 |

|    |                 |                                                             |              |        |    |    |
|----|-----------------|-------------------------------------------------------------|--------------|--------|----|----|
| 43 | <i>MYO6</i>     | myosin VI                                                   | NM_004999    | 600970 | AD | 35 |
| 44 | <i>MYO7A</i>    | myosin VIIA                                                 | NM_000260    | 276903 | AD | 49 |
| 45 | <i>OSBPL2</i>   | oxysterol binding protein like 2                            | NM_144498    | 606731 | AD | 14 |
| 46 | <i>OTOA</i>     | otoancorin                                                  | NM_144672    | 607038 | AR | 28 |
| 47 | <i>OTOF</i>     | otoferlin                                                   | NM_194248    | 603681 | AR | 47 |
| 48 | <i>OTOG</i>     | otogelin                                                    | NM_001292063 | 604487 | AR | 56 |
| 49 | <i>OTOGL</i>    | otogelin like                                               | NM_173591    | 614925 | AR | 58 |
| 50 | <i>P2RX2</i>    | purinergic receptor P2X 2                                   | NM_174873    | 600844 | AD | 12 |
| 51 | <i>PCDH15</i>   | protocadherin related 15                                    | NM_001142769 | 605514 | AR | 36 |
| 52 | <i>POU3F4</i>   | POU class 3 homeobox 4                                      | NM_000307    | 300039 | XR | 1  |
| 53 | <i>POU4F3</i>   | POU class 4 homeobox 3                                      | NM_002700    | 602460 | AD | 2  |
| 54 | <i>PRPS1</i>    | phosphoribosyl pyrophosphate synthetase 1                   | NM_002764    | 311850 | XR | 7  |
| 55 | <i>RDX</i>      | radixin                                                     | NM_001260492 | 179410 | AR | 16 |
| 56 | <i>S1PR2</i>    | sphingosine-1-phosphate receptor 2                          | NM_004230    | 605111 | AR | 2  |
| 57 | <i>SERPINB6</i> | serpin family B member 6                                    | NM_001195291 | 173321 | AR | 8  |
| 58 | <i>SLC26A4</i>  | solute carrier family 26 member 4                           | NM_000441    | 605646 | AR | 21 |
| 59 | <i>SMPX</i>     | small muscle protein, X-linked                              | NR_045617    | 300226 | XR | 6  |
| 60 | <i>STRC</i>     | stereocilin                                                 | NM_153700    | 606440 | AR | 29 |
| 61 | <i>SYNE4</i>    | spectrin repeat containing nuclear envelope family member 4 | NM_001039876 | 615535 | AR | 8  |
| 62 | <i>TBC1D24</i>  | TBC1 domain family member 24                                | NM_001199107 | 613577 | AR | 8  |
| 63 | <i>TECTA</i>    | tectorin alpha                                              | NM_005422    | 602574 | AD | 23 |
| 64 | <i>TMC1</i>     | transmembrane channel like 1                                | NM_138691    | 606706 | AD | 24 |
| 65 | <i>TMIE</i>     | transmembrane inner ear                                     | NM_147196    | 607237 | AR | 4  |

|    |                |                                                      |              |        |    |    |
|----|----------------|------------------------------------------------------|--------------|--------|----|----|
| 66 | <i>TMPRSS3</i> | transmembrane protease, serine 3                     | NM_024022    | 605511 | AR | 13 |
| 67 | <i>TPRN</i>    | taperin                                              | NM_001128228 | 613354 | AR | 4  |
| 68 | <i>TRIOBP</i>  | TRIO and F-actin binding protein                     | NM_001039141 | 609761 | AR | 24 |
| 69 | <i>TSPEAR</i>  | thrombospondin type laminin G domain and EAR repeats | NM_001272037 | 612920 | AR | 13 |
| 70 | <i>USH1C</i>   | USH1 protein network component harmonin              | NM_153676    | 605242 | AR | 27 |
| 71 | <i>WFS1</i>    | wolframin ER transmembrane glycoprotein              | NM_001145853 | 606201 | AD | 8  |
| 72 | <i>WHRN</i>    | whirlin                                              | NM_001083885 | 607928 | AR | 12 |

**Table S4. Mean coverage of target regions in 72 known NSHL genes**

| Chr  | Start     | End       | Name  | YUHL<br>8-21 | YUHL<br>10-21 | YUHL<br>13-21 | YUHL<br>14-21 | YUHL<br>20-21 | YUHL<br>21-21 | YUHL<br>24-21 | YUHL<br>25-21 | YUHL<br>26-21 | YUHL<br>36-21 | YUHL<br>40-21 | YUHL<br>43-21 | YUHL<br>44-21 | Average<br>(highlight<=1) |
|------|-----------|-----------|-------|--------------|---------------|---------------|---------------|---------------|---------------|---------------|---------------|---------------|---------------|---------------|---------------|---------------|---------------------------|
| chr1 | 6485017   | 6485309   | ESPN  | 4.32         | 8.37          | 1.77          | 8.22          | 12.97         | 4.60          | 9.74          | 7.37          | 5.18          | 15.29         | 5.16          | 2.09          | 7.90          | 7.09                      |
| chr1 | 6488287   | 6488479   | ESPN  | 53.11        | 64.49         | 53.84         | 61.27         | 91.08         | 47.43         | 72.31         | 81.97         | 71.88         | 136.20        | 63.95         | 29.79         | 65.74         | 68.94                     |
| chr1 | 6500315   | 6500500   | ESPN  | 22.47        | 19.46         | 15.26         | 22.92         | 39.44         | 16.26         | 36.15         | 32.63         | 22.42         | 47.45         | 13.95         | 13.61         | 24.87         | 25.17                     |
| chr1 | 6500687   | 6500868   | ESPN  | 9.91         | 9.49          | 4.53          | 6.04          | 20.30         | 3.18          | 8.57          | 10.48         | 6.48          | 14.45         | 10.35         | 5.36          | 7.42          | 9.10                      |
| chr1 | 6500995   | 6501125   | ESPN  | 21.04        | 35.37         | 25.54         | 25.40         | 43.39         | 23.56         | 34.50         | 47.74         | 37.76         | 83.85         | 28.19         | 16.85         | 32.99         | 35.27                     |
| chr1 | 6504542   | 6504742   | ESPN  | 53.03        | 64.86         | 48.44         | 57.90         | 110.37        | 48.33         | 70.69         | 93.09         | 77.31         | 171.47        | 78.70         | 45.57         | 72.42         | 76.65                     |
| chr1 | 6505725   | 6505995   | ESPN  | 14.68        | 16.43         | 12.06         | 16.72         | 30.31         | 13.67         | 17.92         | 25.66         | 18.12         | 43.40         | 17.62         | 12.70         | 16.31         | 19.94                     |
| chr1 | 6508702   | 6509151   | ESPN  | 6.24         | 9.54          | 5.74          | 7.26          | 14.90         | 8.29          | 8.09          | 9.10          | 8.10          | 17.04         | 6.51          | 7.11          | 7.79          | 8.99                      |
| chr1 | 6511664   | 6511808   | ESPN  | 38.51        | 58.52         | 32.48         | 56.30         | 78.68         | 40.51         | 54.37         | 82.44         | 77.10         | 108.56        | 51.81         | 39.66         | 60.95         | 59.91                     |
| chr1 | 6511894   | 6512156   | ESPN  | 19.97        | 28.75         | 17.22         | 25.63         | 34.45         | 22.19         | 27.82         | 42.08         | 39.09         | 62.75         | 31.41         | 15.57         | 27.13         | 30.58                     |
| chr1 | 6517245   | 6517323   | ESPN  | 41.35        | 36.62         | 36.81         | 42.63         | 70.24         | 26.11         | 34.97         | 51.90         | 43.90         | 83.86         | 54.58         | 22.97         | 45.85         | 45.50                     |
| chr1 | 6517422   | 6517432   | ESPN  | 65.00        | 34.55         | 50.18         | 60.73         | 90.36         | 32.82         | 51.73         | 68.09         | 59.73         | 99.00         | 75.36         | 26.82         | 66.82         | 59.53                     |
| chr1 | 6520060   | 6520206   | ESPN  | 21.48        | 27.75         | 14.61         | 22.86         | 47.64         | 21.67         | 27.82         | 35.46         | 31.37         | 66.41         | 28.35         | 15.61         | 29.19         | 30.09                     |
| chr1 | 41249767  | 41250079  | KCNQ4 | 54.51        | 88.40         | 55.94         | 47.58         | 79.25         | 57.72         | 82.20         | 93.75         | 87.29         | 93.98         | 72.33         | 49.06         | 62.84         | 71.84                     |
| chr1 | 41282938  | 41283027  | KCNQ4 | 32.91        | 49.71         | 28.29         | 31.47         | 59.63         | 27.77         | 42.36         | 81.54         | 42.43         | 62.56         | 43.01         | 31.69         | 37.82         | 44.45                     |
| chr1 | 41283837  | 41283962  | KCNQ4 | 58.47        | 89.85         | 65.71         | 86.00         | 121.60        | 66.21         | 98.89         | 130.98        | 106.97        | 186.26        | 78.10         | 48.43         | 113.16        | 94.79                     |
| chr1 | 41284178  | 41284352  | KCNQ4 | 41.83        | 41.38         | 36.83         | 54.06         | 82.97         | 29.50         | 47.20         | 78.50         | 55.55         | 104.69        | 48.13         | 31.67         | 56.70         | 54.36                     |
| chr1 | 41285020  | 41285144  | KCNQ4 | 69.63        | 76.65         | 55.10         | 117.61        | 145.62        | 69.78         | 80.76         | 121.08        | 88.90         | 218.22        | 104.55        | 53.00         | 106.25        | 100.08                    |
| chr1 | 41285548  | 41285657  | KCNQ4 | 44.76        | 71.67         | 44.89         | 59.15         | 81.86         | 49.58         | 52.85         | 84.05         | 71.65         | 117.52        | 57.86         | 39.94         | 53.18         | 64.65                     |
| chr1 | 41285838  | 41285932  | KCNQ4 | 69.72        | 87.15         | 52.39         | 78.02         | 118.19        | 64.05         | 83.47         | 138.03        | 99.77         | 180.43        | 81.36         | 54.67         | 88.14         | 92.27                     |
| chr1 | 41287987  | 41288074  | KCNQ4 | 14.69        | 21.49         | 10.16         | 15.78         | 30.64         | 14.44         | 22.42         | 35.25         | 23.35         | 48.98         | 17.32         | 12.56         | 24.43         | 22.26                     |
| chr1 | 41289770  | 41289930  | KCNQ4 | 22.19        | 40.43         | 29.80         | 19.89         | 43.68         | 31.70         | 42.45         | 44.76         | 39.96         | 57.48         | 23.65         | 26.91         | 33.01         | 35.24                     |
| chr1 | 41296757  | 41296976  | KCNQ4 | 84.63        | 92.92         | 73.66         | 91.49         | 138.45        | 72.24         | 91.63         | 130.07        | 90.92         | 232.00        | 84.60         | 63.18         | 111.77        | 103.82                    |
| chr1 | 41298687  | 41298785  | KCNQ4 | 115.93       | 107.31        | 62.54         | 112.23        | 191.09        | 93.36         | 133.40        | 169.25        | 128.10        | 244.04        | 109.85        | 74.75         | 136.14        | 128.49                    |
| chr1 | 41300640  | 41300770  | KCNQ4 | 64.18        | 46.59         | 33.56         | 72.15         | 104.79        | 40.37         | 57.95         | 76.87         | 57.57         | 144.08        | 77.19         | 34.50         | 79.46         | 67.48                     |
| chr1 | 41303338  | 41303466  | KCNQ4 | 36.08        | 60.40         | 31.68         | 38.02         | 56.98         | 35.36         | 57.48         | 61.55         | 65.56         | 113.04        | 49.51         | 29.24         | 49.86         | 52.91                     |
| chr1 | 41303984  | 41304195  | KCNQ4 | 99.68        | 115.32        | 81.13         | 123.14        | 189.49        | 95.54         | 102.07        | 178.74        | 122.83        | 295.86        | 110.83        | 78.82         | 128.02        | 132.79                    |
| chr1 | 55464861  | 55465036  | BSND  | 45.79        | 37.15         | 28.07         | 39.76         | 67.09         | 40.20         | 51.34         | 81.22         | 48.14         | 100.59        | 33.56         | 29.77         | 47.51         | 50.22                     |
| chr1 | 55470696  | 55470789  | BSND  | 73.54        | 77.04         | 102.35        | 78.01         | 88.48         | 165.74        | 121.50        | 151.51        | 118.04        | 111.04        | 78.01         | 71.41         | 76.65         | 103.06                    |
| chr1 | 55472671  | 55472945  | BSND  | 37.13        | 40.87         | 37.24         | 47.13         | 52.21         | 24.14         | 44.20         | 47.80         | 48.93         | 97.49         | 41.49         | 34.73         | 39.76         | 46.11                     |
| chr1 | 55473888  | 55474301  | BSND  | 95.18        | 120.58        | 96.75         | 121.09        | 173.49        | 96.25         | 127.33        | 164.75        | 140.45        | 255.33        | 117.21        | 82.74         | 120.90        | 132.60                    |
| chr1 | 109427898 | 109428200 | GPSM2 | 13.25        | 25.29         | 22.89         | 11.03         | 19.73         | 14.83         | 26.64         | 27.94         | 31.47         | 0.33          | 19.20         | 21.73         | 13.90         | 19.53                     |
| chr1 | 109439487 | 109439707 | GPSM2 | 39.86        | 57.24         | 43.52         | 38.66         | 59.68         | 36.22         | 57.07         | 94.51         | 60.17         | 20.25         | 40.37         | 38.25         | 47.30         | 48.82                     |
| chr1 | 109440115 | 109440249 | GPSM2 | 83.90        | 142.94        | 88.55         | 72.36         | 99.04         | 81.87         | 141.57        | 182.66        | 151.18        | 47.14         | 101.15        | 72.57         | 73.06         | 105.41                    |
| chr1 | 109440582 | 109440723 | GPSM2 | 23.73        | 28.92         | 20.86         | 19.44         | 38.27         | 23.33         | 28.28         | 56.09         | 40.35         | 15.08         | 34.43         | 15.78         | 29.58         | 28.71                     |
| chr1 | 109441265 | 109441387 | GPSM2 | 73.70        | 94.22         | 57.82         | 50.41         | 84.40         | 60.66         | 98.44         | 159.54        | 112.54        | 36.00         | 75.80         | 48.13         | 68.58         | 79.30                     |
| chr1 | 109441502 | 109441616 | GPSM2 | 25.75        | 45.35         | 25.46         | 20.63         | 35.70         | 23.16         | 44.56         | 68.18         | 55.33         | 1.30          | 19.18         | 27.70         | 24.17         | 32.69                     |
| chr1 | 109444413 | 109444567 | GPSM2 | 72.06        | 113.05        | 71.83         | 55.69         | 105.33        | 65.51         | 116.08        | 144.05        | 123.55        | 2.24          | 84.26         | 66.81         | 67.94         | 85.04                     |
| chr1 | 109445749 | 109445856 | GPSM2 | 50.74        | 80.06         | 45.40         | 27.53         | 56.97         | 36.27         | 64.32         | 94.09         | 81.81         | 8.49          | 44.49         | 44.29         | 55.02         | 53.28                     |
| chr1 | 109446748 | 109446876 | GPSM2 | 11.62        | 27.97         | 13.98         | 10.17         | 22.83         | 14.59         | 27.25         | 42.31         | 33.60         | 0.00          | 13.97         | 16.81         | 13.27         | 19.59                     |
| chr1 | 109456961 | 109457030 | GPSM2 | 23.67        | 53.64         | 31.23         | 19.01         | 20.40         | 27.94         | 49.66         | 54.39         | 52.84         | 9.71          | 31.97         | 36.17         | 22.91         | 34.22                     |
| chr1 | 109461236 | 109461411 | GPSM2 | 77.29        | 136.08        | 73.08         | 77.32         | 95.19         | 87.15         | 134.83        | 182.21        | 151.27        | 19.65         | 86.71         | 73.61         | 75.30         | 99.53                     |
| chr1 | 109465040 | 109465198 | GPSM2 | 74.00        | 151.08        | 97.71         | 72.55         | 119.45        | 77.07         | 156.04        | 213.44        | 151.68        | 2.82          | 100.14        | 95.91         | 87.84         | 109.32                    |
| chr1 | 109466623 | 109466836 | GPSM2 | 113.86       | 152.74        | 109.36        | 99.91         | 148.16        | 90.99         | 161.04        | 218.47        | 190.28        | 115.04        | 130.00        | 100.88        | 122.48        | 135.89                    |
| chr1 | 109472324 | 109472597 | GPSM2 | 60.70        | 103.64        | 67.56         | 60.58         | 94.06         | 52.11         | 91.53         | 130.44        | 121.32        | 18.98         | 70.54         | 61.80         | 67.28         | 77.77                     |
| chr2 | 26680909  | 26681088  | OTOF  | 110.01       | 137.12        | 66.88         | 121.77        | 177.34        | 111.97        | 128.93        | 151.02        | 138.58        | 281.93        | 129.42        | 87.21         | 148.09        | 136.85                    |
| chr2 | 26682877  | 26683073  | OTOF  | 35.18        | 24.03         | 26.23         | 43.94         | 48.39         | 20.61         | 34.11         | 59.74         | 29.85         | 70.26         | 38.45         | 17.88         | 42.59         | 37.39                     |
| chr2 | 26683516  | 26683615  | OTOF  | 57.85        | 68.47         | 49.11         | 68.68         | 100.45        | 47.20         | 68.45         | 87.04         | 78.86         | 117.48        | 59.59         | 40.60         | 64.16         | 70.32                     |
| chr2 | 26683721  | 26683898  | OTOF  | 110.89       | 135.52        | 98.13         | 127.43        | 212.56        | 103.40        | 140.31        | 209.85        | 151.76        | 277.80        | 119.96        | 87.93         | 148.50        | 147.96                    |
| chr2 | 26684565  | 26684805  | OTOF  | 74.99        | 76.64         | 58.90         | 70.53         | 132.67        | 74.22         | 86.05         | 129.81        | 96.68         | 190.63        | 83.18         | 63.30         | 90.93         | 94.80                     |
| chr2 | 26684952  | 26685049  | OTOF  | 65.05        | 49.01         | 44.36         | 59.10         | 91.85         | 55.08         | 60.30         | 109.02        | 67.73         | 131.09        | 53.68         | 39.66         | 76.18         | 68.83                     |
| chr2 | 26686352  | 26686439  | OTOF  | 47.65        | 49.57         | 33.15         | 54.75         | 84.61         | 38.53         | 61.97         | 84.28         | 49.88         | 72.45         | 39.99         | 32.58         | 38.48         | 54.12                     |
| chr2 | 26686833  | 26686974  | OTOF  | 53.69        | 75.89         | 51.61         | 72.11         | 95.57         | 52.36         | 61.65         | 89.85         | 66.82         | 169.32        | 84.31         | 52.83         | 65.73         | 77.17                     |
| chr2 | 26687738  | 26687897  | OTOF  | 37.79        | 50.69         | 29.22         | 46.93         | 69.80         | 41.29         | 47.23         | 50.23         | 53.13         | 110.22        | 39.32         | 31.28         | 41.99         | 50.59                     |
| chr2 | 26688541  | 26688710  | OTOF  | 63.54        | 78.12         | 64.28         | 84.46         | 113.89        | 76.68         | 85.88         | 119.50        | 103.00        | 174.82        | 62.34         | 58.36         | 76.65         | 90.41                     |
| chr2 | 26688818  | 26688944  | OTOF  | 60.87        | 92.29         | 64.58         | 70.57         | 108.78        | 52.72         | 97.75         | 143.86        | 92.08         | 164.76        | 65.53         | 63.07         | 78.60         | 89.74                     |
| chr2 | 26689583  | 26689719  | OTOF  | 73.99        | 125.43        | 74.09         | 76.61         | 131.09        | 79.49         | 111.80        | 161.66        | 125.63        | 207.58        | 113.15        | 74.67         | 102.47        | 112.93                    |
| chr2 | 26689968  | 26690101  | OTOF  | 91.04        | 103.92        | 74.96         | 83.34         | 158.15        | 97.95         | 136.01        | 168.11        | 121.63        | 234.78        | 85.62         | 74.48         | 113.68        | 119.17                    |
| chr2 | 26690234  | 26690369  | OTOF  | 34.44        | 39.10         | 27.37         | 25.44         | 50.06         | 44.94         | 40.59         | 59.15         | 54.81         | 72.66         | 44.19         | 36.84         | 35.51         | 44.13                     |
| chr2 | 26691277  | 26691342  | OTOF  | 18.41        | 42.92         | 30.26         | 24.89         | 41.41         | 22.80         | 36.77         | 47.36         | 46.77         | 46.61         | 38.09         | 23.85         | 30.08         | 35.01                     |
| chr2 | 26693462  | 26693589  | OTOF  | 33.80        | 36.27         | 20.23         | 30.34         | 45.58         | 29.48         | 31.26         | 45.23         | 38.64         | 56.40         | 34.73         | 16.60         | 33.21         | 34.88                     |
| chr2 | 26693990  | 26694018  | OTOF  | 54.24        | 60.55         | 59.10         | 67.21         | 104.86        | 44.10         | 69.90         | 68.31         | 78.38         | 154.28        | 68.24         | 46.90         | 93.21         | 73.01                     |
| chr2 | 26695388  | 26695517  | OTOF  | 59.54        | 62.78         | 41.43         | 70.00         | 109.88        | 47.23         | 73.15         | 103.79        | 72.42         | 158.98        | 63.92         | 42.15         | 67.09         | 75.44                     |
| chr2 | 26696001  | 26696162  | OTOF  | 47.79        | 49.01         | 36.44         | 64.52         | 80.38         | 30.54         | 55.76         | 61.95         | 59.96         | 117.14        | 47.55         | 36.02         | 51.93         | 57.26                     |
| chr2 | 26696275  | 26696435  | OTOF  |              |               |               |               |               |               |               |               |               |               |               |               |               |                           |

|      |           |           |        |        |        |        |        |        |        |        |        |        |        |        |        |        |        |
|------|-----------|-----------|--------|--------|--------|--------|--------|--------|--------|--------|--------|--------|--------|--------|--------|--------|--------|
| chr2 | 26703072  | 26703179  | OTOF   | 24.91  | 46.15  | 24.32  | 29.39  | 63.54  | 28.94  | 35.69  | 70.97  | 48.33  | 86.10  | 45.54  | 21.51  | 39.13  | 43.78  |
| chr2 | 26703655  | 26703877  | OTOF   | 46.10  | 53.43  | 35.28  | 57.29  | 113.91 | 48.04  | 68.26  | 87.23  | 78.63  | 146.52 | 44.54  | 40.89  | 67.43  | 68.34  |
| chr2 | 26705275  | 26705460  | OTOF   | 32.79  | 38.87  | 33.97  | 37.77  | 57.37  | 37.52  | 43.64  | 71.18  | 50.28  | 112.99 | 43.02  | 27.11  | 49.89  | 48.88  |
| chr2 | 26706331  | 26706516  | OTOF   | 29.22  | 23.44  | 14.45  | 19.32  | 38.08  | 19.41  | 24.82  | 35.09  | 21.41  | 46.95  | 24.83  | 17.90  | 24.51  | 26.24  |
| chr2 | 26707343  | 26707501  | OTOF   | 62.67  | 60.52  | 38.87  | 55.84  | 114.83 | 55.75  | 68.71  | 95.25  | 69.09  | 154.48 | 72.13  | 44.98  | 52.55  | 74.43  |
| chr2 | 26712080  | 26712163  | OTOF   | 48.88  | 47.79  | 33.11  | 57.79  | 93.35  | 42.43  | 57.32  | 86.67  | 58.26  | 149.88 | 48.50  | 28.21  | 63.39  | 62.68  |
| chr2 | 26712547  | 26712608  | OTOF   | 80.21  | 118.02 | 66.44  | 112.11 | 167.26 | 67.94  | 97.42  | 174.61 | 127.16 | 205.40 | 88.61  | 55.18  | 89.60  | 113.36 |
| chr2 | 26717811  | 26717941  | OTOF   | 59.42  | 69.41  | 41.27  | 73.76  | 102.60 | 54.59  | 75.94  | 100.21 | 81.05  | 145.96 | 89.08  | 55.64  | 72.21  | 79.08  |
| chr2 | 26724623  | 26724676  | OTOF   | 32.09  | 55.76  | 40.19  | 40.93  | 72.57  | 26.11  | 59.85  | 70.31  | 81.07  | 54.65  | 44.91  | 33.89  | 52.78  | 51.03  |
| chr2 | 26725169  | 26725294  | OTOF   | 27.67  | 39.25  | 23.57  | 25.06  | 44.40  | 19.00  | 36.98  | 47.62  | 28.12  | 53.63  | 30.49  | 23.30  | 37.84  | 33.26  |
| chr2 | 26726641  | 26726713  | OTOF   | 59.07  | 83.21  | 51.34  | 78.32  | 103.11 | 49.38  | 85.73  | 112.49 | 91.12  | 125.56 | 75.52  | 54.64  | 63.42  | 80.79  |
| chr2 | 26739287  | 26739467  | OTOF   | 39.72  | 47.91  | 34.97  | 44.12  | 72.42  | 38.89  | 53.94  | 65.48  | 59.72  | 113.20 | 60.38  | 31.75  | 51.14  | 55.21  |
| chr2 | 26741879  | 26741977  | OTOF   | 64.58  | 72.98  | 50.41  | 84.06  | 106.14 | 60.96  | 66.32  | 109.06 | 81.69  | 169.17 | 74.76  | 47.92  | 71.38  | 82.34  |
| chr2 | 26750701  | 26750788  | OTOF   | 49.84  | 62.56  | 51.11  | 48.48  | 96.40  | 54.26  | 59.80  | 104.28 | 79.61  | 108.45 | 49.91  | 44.52  | 65.57  | 67.44  |
| chr2 | 26760585  | 26760642  | OTOF   | 37.78  | 38.69  | 31.40  | 24.09  | 58.17  | 26.93  | 28.64  | 65.02  | 32.03  | 66.81  | 40.53  | 34.43  | 34.07  | 40.38  |
| chr2 | 26781362  | 26781439  | OTOF   | 46.22  | 55.79  | 39.58  | 58.77  | 115.01 | 63.04  | 68.77  | 92.50  | 74.22  | 157.97 | 75.15  | 44.24  | 64.79  | 74.27  |
| chr2 | 85582200  | 85582293  | ELMOD3 | 0.00   | 0.07   | 0.82   | 0.00   | 0.00   | 4.40   | 0.00   | 0.50   | 1.00   | 0.00   | 0.00   | 0.00   | 0.00   | 0.57   |
| chr2 | 85582679  | 85582839  | ELMOD3 | 0.45   | 0.78   | 0.00   | 0.00   | 1.63   | 0.63   | 0.46   | 0.00   | 0.53   | 0.69   | 0.00   | 0.00   | 0.00   | 0.43   |
| chr2 | 85583726  | 85583790  | ELMOD3 | 0.32   | 0.63   | 0.88   | 0.00   | 0.71   | 1.94   | 0.00   | 1.00   | 0.00   | 0.18   | 0.78   | 0.66   | 0.00   | 0.59   |
| chr2 | 85584091  | 85584375  | ELMOD3 | 50.50  | 78.88  | 50.30  | 48.39  | 71.99  | 39.68  | 74.22  | 104.23 | 88.19  | 24.76  | 62.27  | 49.69  | 60.84  | 61.92  |
| chr2 | 85589310  | 85589383  | ELMOD3 | 64.74  | 141.18 | 86.66  | 62.36  | 101.01 | 70.27  | 116.24 | 165.53 | 144.41 | 32.49  | 82.32  | 70.04  | 69.55  | 94.77  |
| chr2 | 85590221  | 85590289  | ELMOD3 | 13.75  | 17.75  | 16.78  | 21.68  | 27.62  | 17.13  | 23.74  | 49.49  | 32.43  | 33.58  | 22.09  | 24.67  | 12.01  | 25.06  |
| chr2 | 85595810  | 85595877  | ELMOD3 | 20.68  | 35.63  | 24.93  | 18.71  | 30.19  | 29.65  | 33.26  | 45.10  | 29.32  | 41.88  | 35.07  | 25.10  | 18.35  | 30.79  |
| chr2 | 85596863  | 85596953  | ELMOD3 | 39.30  | 39.66  | 27.90  | 38.75  | 58.33  | 21.52  | 54.07  | 59.60  | 52.11  | 90.93  | 53.13  | 31.60  | 42.84  | 47.24  |
| chr2 | 85598210  | 85598332  | ELMOD3 | 57.02  | 63.14  | 55.34  | 59.26  | 106.52 | 46.74  | 64.22  | 97.69  | 81.96  | 145.43 | 76.52  | 39.10  | 72.79  | 74.41  |
| chr2 | 85598564  | 85598685  | ELMOD3 | 36.39  | 38.95  | 37.04  | 42.48  | 56.31  | 35.81  | 42.52  | 59.78  | 53.07  | 87.36  | 58.23  | 27.14  | 42.84  | 47.92  |
| chr2 | 85604468  | 85604597  | ELMOD3 | 66.62  | 62.13  | 45.42  | 67.69  | 88.62  | 51.48  | 73.06  | 99.34  | 58.43  | 171.28 | 72.08  | 45.19  | 66.89  | 75.11  |
| chr2 | 85616875  | 85616950  | ELMOD3 | 62.67  | 73.64  | 59.01  | 71.01  | 89.34  | 61.62  | 96.16  | 126.36 | 91.51  | 164.46 | 84.30  | 54.53  | 82.41  | 86.22  |
| chr2 | 85617262  | 85617621  | ELMOD3 | 85.01  | 104.72 | 83.17  | 93.24  | 121.44 | 81.56  | 119.29 | 175.77 | 119.54 | 167.15 | 106.13 | 75.51  | 97.27  | 111.04 |
| chr2 | 85617884  | 85618085  | ELMOD3 | 44.41  | 54.78  | 89.33  | 53.23  | 53.23  | 119.08 | 50.73  | 78.49  | 58.91  | 54.04  | 39.20  | 28.36  | 34.27  | 60.32  |
| chr2 | 179318116 | 179318347 | DFNB59 | 58.27  | 109.11 | 78.03  | 53.19  | 68.25  | 55.81  | 93.56  | 128.72 | 108.33 | 17.15  | 80.81  | 55.92  | 72.44  | 75.60  |
| chr2 | 179319060 | 179319254 | DFNB59 | 12.11  | 39.81  | 25.92  | 16.33  | 21.41  | 25.38  | 35.86  | 69.78  | 44.86  | 0.52   | 29.08  | 20.98  | 25.96  | 28.50  |
| chr2 | 179320738 | 179320878 | DFNB59 | 54.65  | 82.65  | 57.90  | 56.07  | 95.79  | 45.55  | 87.98  | 123.63 | 95.27  | 54.84  | 64.82  | 52.60  | 55.72  | 72.64  |
| chr2 | 179323238 | 179323354 | DFNB59 | 77.74  | 124.09 | 98.20  | 79.50  | 102.97 | 82.23  | 141.38 | 171.14 | 144.07 | 7.62   | 90.71  | 82.91  | 86.74  | 100.21 |
| chr2 | 179325076 | 179325173 | DFNB59 | 29.78  | 67.53  | 36.67  | 43.82  | 51.76  | 45.04  | 69.77  | 88.84  | 74.96  | 4.43   | 33.45  | 28.61  | 38.70  | 47.89  |
| chr2 | 179325710 | 179326001 | DFNB59 | 120.19 | 190.67 | 113.50 | 97.11  | 136.12 | 103.29 | 178.67 | 284.02 | 228.10 | 24.02  | 127.10 | 111.60 | 100.29 | 142.87 |
| chr3 | 46742979  | 46743070  | TMIE   | 30.79  | 43.14  | 20.76  | 34.11  | 58.20  | 38.79  | 45.67  | 49.32  | 48.24  | 68.60  | 36.71  | 39.72  | 40.68  | 42.84  |
| chr3 | 46747281  | 46747397  | TMIE   | 53.18  | 58.30  | 48.50  | 63.12  | 76.32  | 52.26  | 61.71  | 90.76  | 77.47  | 133.20 | 50.06  | 46.16  | 60.60  | 67.59  |
| chr3 | 46750617  | 46750765  | TMIE   | 57.15  | 57.56  | 43.72  | 66.01  | 108.56 | 48.38  | 60.97  | 81.72  | 84.70  | 144.58 | 77.50  | 46.09  | 75.26  | 73.08  |
| chr3 | 46751070  | 46751178  | TMIE   | 36.66  | 21.85  | 21.89  | 34.58  | 59.75  | 19.12  | 21.61  | 27.54  | 31.88  | 48.97  | 37.97  | 21.11  | 34.89  | 31.91  |
| chr3 | 121707215 | 121707255 | ILDR1  | 54.78  | 74.00  | 41.00  | 51.66  | 78.63  | 36.80  | 76.51  | 115.51 | 90.02  | 48.80  | 69.07  | 41.46  | 52.39  | 64.86  |
| chr3 | 121711998 | 121712817 | ILDR1  | 52.33  | 66.72  | 43.45  | 53.96  | 95.77  | 49.49  | 69.96  | 90.05  | 73.58  | 136.41 | 57.43  | 47.77  | 69.88  | 69.74  |
| chr3 | 121713030 | 121713160 | ILDR1  | 40.27  | 61.67  | 44.69  | 51.38  | 100.43 | 49.75  | 70.95  | 78.90  | 75.71  | 101.90 | 65.59  | 41.59  | 65.96  | 65.24  |
| chr3 | 121720156 | 121720301 | ILDR1  | 21.68  | 26.99  | 16.42  | 34.16  | 49.20  | 17.46  | 25.22  | 41.81  | 20.92  | 41.47  | 37.21  | 25.71  | 21.55  | 29.85  |
| chr3 | 121720593 | 121720711 | ILDR1  | 25.89  | 33.50  | 17.56  | 19.47  | 43.42  | 24.19  | 37.09  | 41.92  | 43.85  | 29.25  | 25.30  | 19.18  | 27.06  | 30.05  |
| chr3 | 121724092 | 121724240 | ILDR1  | 57.54  | 88.05  | 55.56  | 60.50  | 118.52 | 71.37  | 96.56  | 116.68 | 105.07 | 172.66 | 73.74  | 81.59  | 80.82  | 91.49  |
| chr3 | 121725839 | 121726008 | ILDR1  | 29.61  | 29.61  | 24.06  | 21.99  | 41.58  | 24.32  | 34.88  | 55.28  | 34.07  | 56.75  | 27.30  | 17.16  | 30.51  | 33.05  |
| chr3 | 121740868 | 121740924 | ILDR1  | 24.12  | 24.93  | 19.07  | 30.65  | 57.35  | 26.33  | 32.47  | 44.16  | 28.60  | 71.88  | 39.81  | 22.46  | 37.05  | 35.15  |
| chr3 | 191047465 | 191047512 | CCDC50 | 58.69  | 81.92  | 37.92  | 69.25  | 137.46 | 53.54  | 73.44  | 99.63  | 77.65  | 171.73 | 56.33  | 43.88  | 84.48  | 80.12  |
| chr3 | 191074878 | 191074939 | CCDC50 | 40.98  | 85.19  | 59.42  | 51.37  | 82.34  | 62.19  | 76.40  | 113.73 | 84.47  | 33.66  | 71.61  | 49.61  | 54.03  | 67.58  |
| chr3 | 191075788 | 191075913 | CCDC50 | 82.56  | 148.30 | 101.23 | 93.64  | 128.12 | 72.14  | 157.88 | 230.46 | 162.02 | 91.06  | 107.47 | 96.83  | 110.11 | 122.64 |
| chr3 | 191078859 | 191078948 | CCDC50 | 84.91  | 117.74 | 75.34  | 90.90  | 122.96 | 66.54  | 105.42 | 128.87 | 126.38 | 30.18  | 106.12 | 78.34  | 98.67  | 94.48  |
| chr3 | 191087709 | 191087825 | CCDC50 | 76.21  | 130.74 | 86.81  | 79.90  | 109.79 | 67.10  | 138.76 | 176.80 | 135.88 | 12.36  | 98.96  | 69.68  | 94.29  | 98.58  |
| chr3 | 191092852 | 191093378 | CCDC50 | 62.58  | 76.03  | 54.46  | 64.23  | 93.65  | 53.51  | 83.80  | 96.92  | 88.49  | 92.28  | 67.04  | 53.15  | 68.49  | 73.84  |
| chr3 | 191097949 | 191098063 | CCDC50 | 55.39  | 66.34  | 51.86  | 37.97  | 70.36  | 49.21  | 56.62  | 71.64  | 93.07  | 17.68  | 65.53  | 48.75  | 53.87  | 57.03  |
| chr3 | 191098477 | 191098520 | CCDC50 | 33.07  | 42.00  | 37.50  | 29.57  | 46.45  | 31.50  | 33.75  | 51.14  | 41.77  | 6.02   | 52.25  | 28.32  | 32.27  | 36.11  |
| chr3 | 191098618 | 191098721 | CCDC50 | 65.33  | 81.25  | 61.63  | 35.53  | 80.18  | 48.23  | 57.45  | 73.78  | 89.22  | 10.73  | 83.60  | 60.85  | 51.02  | 62.31  |
| chr3 | 191100536 | 191100614 | CCDC50 | 67.66  | 87.62  | 57.28  | 50.56  | 102.95 | 48.80  | 91.70  | 116.39 | 97.06  | 29.53  | 84.90  | 54.96  | 75.65  | 74.12  |
| chr3 | 191107286 | 191107391 | CCDC50 | 85.95  | 121.19 | 86.60  | 77.06  | 137.67 | 80.61  | 138.66 | 210.26 | 179.20 | 42.74  | 100.12 | 89.92  | 112.03 | 112.50 |
| chr3 | 191109531 | 191109549 | CCDC50 | 29.37  | 47.05  | 34.68  | 22.32  | 39.32  | 31.79  | 54.63  | 56.26  | 58.42  | 3.00   | 28.21  | 30.58  | 18.05  | 36.30  |
| chr4 | 6279179   | 6279414   | WFS1   | 39.96  | 44.56  | 30.08  | 36.85  | 73.73  | 34.21  | 37.27  | 43.84  | 44.62  | 92.65  | 54.31  | 27.43  | 52.41  | 46.63  |
| chr4 | 6288821   | 6288902   | WFS1   | 15.37  | 21.52  | 21.21  | 15.74  | 47.65  | 26.43  | 27.72  | 52.07  | 42.18  | 47.68  | 25.67  | 17.96  | 29.06  | 30.10  |
| chr4 | 6290715   | 6290858   | WFS1   | 35.78  | 48.33  | 26.24  | 41.59  | 65.45  | 26.81  | 38.31  | 67.33  | 38.56  | 96.15  | 48.07  | 25.80  | 44.99  | 46.54  |
| chr4 | 6292925   | 6293094   | WFS1   | 64.61  | 102.65 | 61.40  | 95.76  | 125.01 | 73.06  | 116.14 | 143.51 | 101.02 | 194.85 | 110.82 | 72.15  | 101.35 | 105.08 |
| chr4 | 6293645   | 6293724   | WFS1   | 31.73  | 34.64  | 20.84  | 33.94  | 63.78  | 30.51  | 34.46  | 63.69  | 42.35  | 88.09  | 35.01  | 19.86  | 34.66  | 41.57  |
| chr4 | 6296769   | 6296916   | WFS1   | 17.51  | 29.13  | 19.16  | 26.48  | 45.87  | 24.44  | 28.29  | 50.10  | 42.47  | 61.32  |        |        |        |        |

|      |           |           |          |        |        |        |        |        |        |        |        |        |        |        |        |        |        |
|------|-----------|-----------|----------|--------|--------|--------|--------|--------|--------|--------|--------|--------|--------|--------|--------|--------|--------|
| chr5 | 140905606 | 140905740 | DIAPH1   | 44.81  | 84.16  | 43.67  | 50.71  | 67.13  | 45.21  | 87.84  | 110.53 | 108.23 | 71.84  | 52.30  | 49.82  | 58.02  | 68.02  |
| chr5 | 140905865 | 140906028 | DIAPH1   | 79.39  | 128.77 | 67.89  | 83.54  | 111.61 | 84.49  | 129.67 | 174.11 | 124.28 | 83.55  | 86.43  | 81.49  | 86.40  | 102.94 |
| chr5 | 140907141 | 140907264 | DIAPH1   | 51.90  | 81.51  | 73.13  | 57.65  | 61.97  | 49.16  | 106.54 | 122.53 | 104.26 | 18.42  | 73.02  | 56.49  | 53.01  | 71.38  |
| chr5 | 140908021 | 140908149 | DIAPH1   | 38.05  | 46.99  | 42.16  | 35.48  | 57.97  | 35.12  | 59.65  | 87.60  | 71.57  | 49.57  | 58.05  | 34.71  | 52.02  | 51.41  |
| chr5 | 140908270 | 140908508 | DIAPH1   | 78.24  | 111.11 | 87.20  | 78.79  | 115.29 | 70.60  | 120.41 | 181.94 | 145.58 | 79.10  | 103.40 | 81.42  | 91.91  | 104.42 |
| chr5 | 140908740 | 140908840 | DIAPH1   | 54.78  | 93.90  | 60.27  | 63.24  | 99.75  | 59.80  | 100.70 | 139.51 | 125.97 | 71.64  | 80.28  | 55.80  | 71.79  | 83.80  |
| chr5 | 140909171 | 140909264 | DIAPH1   | 72.87  | 67.33  | 80.18  | 71.83  | 113.31 | 76.02  | 81.13  | 149.97 | 111.33 | 70.51  | 82.38  | 79.60  | 83.80  | 88.04  |
| chr5 | 140913903 | 140914000 | DIAPH1   | 86.48  | 138.30 | 90.48  | 76.89  | 103.27 | 102.67 | 165.05 | 171.57 | 178.84 | 10.34  | 97.08  | 99.08  | 83.41  | 110.00 |
| chr5 | 140915622 | 140915629 | DIAPH1   | 24.50  | 66.88  | 39.75  | 36.75  | 56.50  | 38.38  | 51.38  | 86.75  | 75.00  | 33.38  | 58.88  | 38.00  | 39.13  | 50.51  |
| chr5 | 140951494 | 140951607 | DIAPH1   | 48.22  | 75.32  | 52.45  | 46.90  | 67.64  | 45.15  | 73.95  | 100.98 | 61.26  | 28.91  | 72.86  | 53.24  | 52.88  | 60.57  |
| chr5 | 140953060 | 140953775 | DIAPH1   | 25.48  | 37.39  | 28.02  | 32.22  | 36.46  | 29.70  | 44.25  | 52.58  | 45.72  | 58.16  | 38.44  | 27.89  | 33.07  | 38.03  |
| chr5 | 140954535 | 140954713 | DIAPH1   | 45.29  | 78.22  | 53.49  | 68.53  | 85.90  | 62.81  | 94.14  | 116.63 | 108.96 | 52.52  | 85.45  | 62.82  | 71.54  | 76.23  |
| chr5 | 140955798 | 140955861 | DIAPH1   | 83.19  | 151.61 | 92.44  | 77.56  | 127.44 | 79.41  | 140.91 | 210.88 | 166.94 | 8.14   | 102.94 | 91.50  | 73.13  | 111.08 |
| chr5 | 140956324 | 140956438 | DIAPH1   | 47.17  | 71.27  | 44.12  | 57.76  | 64.63  | 39.62  | 68.60  | 105.37 | 70.62  | 10.49  | 60.78  | 43.43  | 57.51  | 56.99  |
| chr5 | 140957043 | 140957158 | DIAPH1   | 61.47  | 75.46  | 49.16  | 53.18  | 87.62  | 41.51  | 79.70  | 134.38 | 92.81  | 7.12   | 71.13  | 29.40  | 60.84  | 65.24  |
| chr5 | 140957793 | 140957910 | DIAPH1   | 103.27 | 172.84 | 139.35 | 91.60  | 145.13 | 126.65 | 208.19 | 264.64 | 212.24 | 34.42  | 126.48 | 134.01 | 126.93 | 146.57 |
| chr5 | 140958083 | 140958192 | DIAPH1   | 19.82  | 23.15  | 25.55  | 16.28  | 33.67  | 25.34  | 30.55  | 56.75  | 36.80  | 12.47  | 22.20  | 23.67  | 28.25  | 27.19  |
| chr5 | 140958656 | 140958763 | DIAPH1   | 19.26  | 61.47  | 38.05  | 44.36  | 54.44  | 33.67  | 62.12  | 91.69  | 81.65  | 31.40  | 46.37  | 32.86  | 58.83  | 49.78  |
| chr5 | 140960312 | 140960450 | DIAPH1   | 40.22  | 44.88  | 32.85  | 49.99  | 68.25  | 35.68  | 45.53  | 56.29  | 58.38  | 29.31  | 39.16  | 28.67  | 41.91  | 44.10  |
| chr5 | 140961880 | 140961942 | DIAPH1   | 80.62  | 133.75 | 86.78  | 93.83  | 116.79 | 99.05  | 154.21 | 191.08 | 144.60 | 22.71  | 114.11 | 78.32  | 97.92  | 109.65 |
| chr5 | 140962774 | 140962859 | DIAPH1   | 48.95  | 64.45  | 57.90  | 63.85  | 80.97  | 58.80  | 79.66  | 121.60 | 98.86  | 36.43  | 78.62  | 73.21  | 67.76  | 71.94  |
| chr5 | 140963053 | 140963182 | DIAPH1   | 22.58  | 36.74  | 22.96  | 24.98  | 33.68  | 23.72  | 35.25  | 57.00  | 42.96  | 16.52  | 41.28  | 25.91  | 27.05  | 31.97  |
| chr5 | 140963692 | 140963792 | DIAPH1   | 18.87  | 16.64  | 24.80  | 14.67  | 31.36  | 22.10  | 32.14  | 47.18  | 35.12  | 5.61   | 21.42  | 22.95  | 22.00  | 24.41  |
| chr5 | 140966610 | 140966764 | DIAPH1   | 113.54 | 170.79 | 108.71 | 96.15  | 140.68 | 97.37  | 171.89 | 257.26 | 201.14 | 33.28  | 140.07 | 105.21 | 105.93 | 136.34 |
| chr5 | 140967792 | 140967817 | DIAPH1   | 69.23  | 87.77  | 41.38  | 54.92  | 71.08  | 37.46  | 59.96  | 81.96  | 71.65  | 27.88  | 64.96  | 34.88  | 76.08  | 58.60  |
| chr5 | 140998366 | 140998481 | DIAPH1   | 47.25  | 82.03  | 39.18  | 24.83  | 42.53  | 56.79  | 51.39  | 49.76  | 69.23  | 69.90  | 49.08  | 40.44  | 65.05  | 51.87  |
| chr5 | 145239297 | 145239478 | GRXCR2   | 33.89  | 55.49  | 27.99  | 46.69  | 72.80  | 31.84  | 46.79  | 70.13  | 51.41  | 84.48  | 42.21  | 26.98  | 49.11  | 49.22  |
| chr5 | 145246065 | 145246291 | GRXCR2   | 76.41  | 108.48 | 90.44  | 67.64  | 107.79 | 73.44  | 130.32 | 170.46 | 151.43 | 38.17  | 84.47  | 96.25  | 98.74  | 99.61  |
| chr5 | 145252197 | 145252531 | GRXCR2   | 66.13  | 110.42 | 80.54  | 77.20  | 112.81 | 69.44  | 117.18 | 139.87 | 120.70 | 106.72 | 77.22  | 68.80  | 84.59  | 95.59  |
| chr5 | 145718677 | 145718795 | POU4F3   | 52.88  | 41.49  | 33.56  | 67.18  | 81.84  | 42.97  | 62.09  | 66.18  | 43.71  | 132.77 | 62.13  | 44.01  | 66.29  | 60.90  |
| chr5 | 145719112 | 145720007 | POU4F3   | 108.59 | 125.65 | 90.12  | 127.20 | 198.10 | 91.87  | 130.04 | 187.75 | 153.17 | 282.24 | 124.35 | 83.10  | 137.64 | 141.85 |
| chr6 | 2948533   | 2948933   | SERPINB6 | 84.52  | 83.34  | 68.12  | 80.23  | 112.58 | 64.66  | 95.14  | 130.91 | 95.68  | 177.46 | 75.44  | 67.54  | 84.03  | 94.64  |
| chr6 | 2949149   | 2949303   | SERPINB6 | 73.25  | 116.41 | 85.28  | 83.17  | 112.75 | 63.19  | 131.39 | 154.95 | 144.40 | 47.39  | 73.29  | 92.21  | 89.94  | 98.14  |
| chr6 | 2953279   | 2953420   | SERPINB6 | 73.05  | 89.80  | 60.25  | 63.62  | 96.08  | 66.15  | 100.26 | 138.00 | 102.43 | 134.97 | 74.89  | 76.01  | 89.25  | 89.63  |
| chr6 | 2954827   | 2954943   | SERPINB6 | 110.01 | 166.40 | 108.35 | 107.97 | 128.05 | 85.77  | 175.77 | 246.30 | 185.35 | 43.55  | 137.50 | 84.57  | 99.36  | 131.63 |
| chr6 | 2955759   | 2955904   | SERPINB6 | 66.36  | 89.61  | 64.23  | 77.18  | 84.36  | 66.02  | 98.91  | 128.77 | 109.60 | 96.42  | 79.67  | 74.90  | 69.27  | 86.34  |
| chr6 | 2959403   | 2959576   | SERPINB6 | 48.44  | 73.15  | 54.56  | 68.16  | 100.02 | 52.10  | 115.87 | 143.25 | 81.01  | 109.68 | 65.89  | 65.29  | 73.24  | 81.45  |
| chr6 | 2969014   | 2969147   | SERPINB6 | 0.00   | 0.00   | 0.00   | 0.00   | 0.71   | 0.56   | 0.00   | 0.34   | 0.00   | 0.00   | 0.00   | 0.00   | 0.00   | 0.13   |
| chr6 | 2970993   | 2971038   | SERPINB6 | 0.00   | 0.00   | 2.00   | 0.00   | 2.28   | 0.00   | 0.00   | 0.00   | 0.00   | 0.00   | 0.00   | 0.00   | 0.00   | 0.36   |
| chr6 | 2971352   | 2971382   | SERPINB6 | 1.00   | 2.65   | 3.29   | 2.23   | 0.00   | 2.55   | 1.23   | 0.00   | 0.00   | 1.00   | 0.00   | 0.00   | 0.00   | 1.16   |
| chr6 | 24806602  | 24806701  | FAM65B   | 86.47  | 97.89  | 67.22  | 71.31  | 108.36 | 65.82  | 112.46 | 142.58 | 127.11 | 60.20  | 78.50  | 77.31  | 81.63  | 91.27  |
| chr6 | 24809946  | 24810035  | FAM65B   | 92.63  | 112.11 | 87.07  | 82.07  | 115.01 | 73.46  | 103.34 | 171.78 | 135.09 | 38.00  | 80.59  | 70.12  | 68.07  | 96.77  |
| chr6 | 24818771  | 24818853  | FAM65B   | 30.27  | 52.02  | 32.06  | 30.94  | 41.60  | 38.00  | 55.00  | 59.51  | 52.81  | 29.99  | 31.16  | 31.36  | 48.46  | 40.39  |
| chr6 | 24825455  | 24825656  | FAM65B   | 47.59  | 77.62  | 42.78  | 41.65  | 76.93  | 47.55  | 63.23  | 103.78 | 80.53  | 28.98  | 53.85  | 39.01  | 44.75  | 58.63  |
| chr6 | 24828366  | 24828523  | FAM65B   | 48.25  | 47.41  | 37.92  | 39.35  | 72.42  | 53.46  | 57.94  | 75.61  | 55.96  | 101.32 | 61.02  | 33.25  | 58.07  | 56.99  |
| chr6 | 24830738  | 24830898  | FAM65B   | 19.19  | 24.99  | 18.49  | 21.24  | 28.08  | 16.54  | 25.53  | 52.57  | 32.85  | 43.35  | 20.84  | 14.57  | 27.35  | 26.52  |
| chr6 | 24832485  | 24832619  | FAM65B   | 101.91 | 138.47 | 97.47  | 89.00  | 133.10 | 95.22  | 143.87 | 235.33 | 187.99 | 59.62  | 128.38 | 74.01  | 113.40 | 123.70 |
| chr6 | 24835932  | 24836099  | FAM65B   | 26.11  | 34.93  | 24.82  | 23.96  | 44.52  | 27.53  | 33.50  | 50.92  | 49.77  | 74.53  | 35.39  | 18.25  | 34.95  | 37.02  |
| chr6 | 24839320  | 24839500  | FAM65B   | 52.53  | 101.66 | 71.65  | 62.50  | 81.12  | 72.60  | 123.76 | 167.09 | 128.82 | 57.67  | 80.47  | 80.38  | 62.43  | 90.02  |
| chr6 | 24839823  | 24839827  | FAM65B   | 49.00  | 61.20  | 42.20  | 45.80  | 71.20  | 32.00  | 66.60  | 66.80  | 65.20  | 27.80  | 54.40  | 51.60  | 58.00  | 52.82  |
| chr6 | 24840933  | 24841003  | FAM65B   | 26.07  | 37.27  | 31.01  | 30.23  | 53.79  | 29.25  | 33.69  | 63.82  | 43.30  | 36.48  | 48.66  | 35.28  | 42.80  | 39.07  |
| chr6 | 24843091  | 24843782  | FAM65B   | 62.76  | 85.32  | 58.55  | 69.79  | 103.63 | 63.49  | 99.49  | 117.82 | 105.15 | 82.82  | 73.28  | 58.29  | 76.92  | 81.70  |
| chr6 | 24847771  | 24847919  | FAM65B   | 31.89  | 35.32  | 29.32  | 37.37  | 50.26  | 32.30  | 37.56  | 53.84  | 37.17  | 63.64  | 37.38  | 31.21  | 39.12  | 39.77  |
| chr6 | 24848254  | 24848382  | FAM65B   | 33.09  | 34.18  | 33.91  | 34.36  | 52.52  | 26.74  | 50.39  | 77.76  | 56.80  | 65.84  | 37.98  | 26.29  | 35.58  | 44.16  |
| chr6 | 24850031  | 24850178  | FAM65B   | 31.18  | 59.36  | 31.87  | 57.39  | 70.84  | 40.76  | 55.97  | 94.68  | 66.34  | 71.34  | 70.96  | 43.85  | 56.16  | 57.88  |
| chr6 | 24850826  | 24850950  | FAM65B   | 49.23  | 89.53  | 44.71  | 63.46  | 72.04  | 63.03  | 83.50  | 97.98  | 99.10  | 90.71  | 69.79  | 65.03  | 69.43  | 74.01  |
| chr6 | 24852804  | 24852846  | FAM65B   | 88.47  | 123.09 | 102.56 | 89.63  | 124.02 | 100.07 | 127.40 | 153.16 | 168.56 | 73.93  | 119.70 | 82.72  | 89.58  | 112.78 |
| chr6 | 24861202  | 24861264  | FAM65B   | 57.97  | 96.13  | 47.52  | 66.10  | 78.89  | 36.94  | 100.13 | 124.83 | 113.33 | 51.79  | 77.33  | 49.60  | 69.62  | 75.05  |
| chr6 | 24865530  | 24865678  | FAM65B   | 49.71  | 69.42  | 50.32  | 50.72  | 85.34  | 58.42  | 69.44  | 95.85  | 75.80  | 51.95  | 50.62  | 40.38  | 45.38  | 62.33  |
| chr6 | 24869323  | 24869375  | FAM65B   | 40.53  | 85.53  | 56.40  | 36.85  | 77.43  | 33.19  | 78.00  | 115.11 | 97.60  | 6.19   | 62.62  | 52.77  | 44.45  | 61.85  |
| chr6 | 24871095  | 24871117  | FAM65B   | 109.78 | 173.48 | 81.17  | 112.30 | 159.70 | 98.70  | 161.04 | 223.22 | 190.48 | 90.70  | 115.91 | 117.91 | 124.39 | 136.20 |
| chr6 | 24873110  | 24873187  | FAM65B   | 69.78  | 118.17 | 75.88  | 73.82  | 88.17  | 70.00  | 129.86 | 193.00 | 120.21 | 31.33  | 82.78  | 72.99  | 72.45  | 93.83  |
| chr6 | 24873873  | 24874027  | FAM65B   | 97.01  | 148.73 | 93.34  | 97.03  | 152.37 | 98.44  | 173.07 | 251.45 | 186.96 | 98.83  | 126.41 | 99.57  | 131.03 | 135.27 |
| chr6 | 24875920  | 24876045  | FAM65B   | 36.33  | 37.24  | 24.17  | 44.73  | 56.91  | 30.40  | 46.73  | 56.25  | 48.98  | 40.61  | 42.13  | 27.29  | 37.57  | 40.98  |
| chr6 | 24936067  | 24936126  | FAM65B   | 35.72  | 45.37  | 35.70  | 55.05  | 61.22  | 35.78  | 42.10  | 65.27  | 64.62  | 89.83  | 62.05  | 35.23  | 42.83  | 52.33  |
| chr6 | 25042080  | 25042     |          |        |        |        |        |        |        |        |        |        |        |        |        |        |        |



|      |          |          |         |        |        |        |        |        |        |        |        |        |        |        |       |        |        |
|------|----------|----------|---------|--------|--------|--------|--------|--------|--------|--------|--------|--------|--------|--------|-------|--------|--------|
| chr6 | 33136733 | 33136785 | COL11A2 | 21.49  | 28.66  | 19.77  | 22.45  | 34.36  | 21.96  | 34.89  | 39.91  | 39.98  | 63.58  | 29.28  | 25.30 | 35.04  | 31.80  |
| chr6 | 33137161 | 33137267 | COL11A2 | 30.10  | 52.18  | 43.71  | 45.35  | 68.35  | 39.32  | 45.05  | 58.05  | 69.79  | 94.94  | 59.63  | 45.10 | 52.35  | 54.30  |
| chr6 | 33137609 | 33137661 | COL11A2 | 44.51  | 69.58  | 45.21  | 43.11  | 90.72  | 45.26  | 63.62  | 108.08 | 84.42  | 105.66 | 49.87  | 43.81 | 59.96  | 66.15  |
| chr6 | 33137825 | 33137877 | COL11A2 | 54.79  | 65.40  | 51.00  | 60.68  | 86.49  | 50.38  | 86.87  | 117.64 | 85.02  | 127.40 | 75.53  | 49.40 | 53.83  | 75.88  |
| chr6 | 33138104 | 33138156 | COL11A2 | 38.26  | 59.47  | 43.38  | 54.77  | 81.68  | 39.36  | 57.09  | 94.19  | 55.87  | 107.60 | 43.43  | 42.43 | 67.92  | 59.80  |
| chr6 | 33138335 | 33138387 | COL11A2 | 27.72  | 38.83  | 32.42  | 34.21  | 52.40  | 34.60  | 40.34  | 54.68  | 41.94  | 54.51  | 42.77  | 32.51 | 49.96  | 40.58  |
| chr6 | 33138588 | 33138694 | COL11A2 | 52.13  | 72.49  | 66.88  | 70.21  | 112.96 | 72.23  | 68.22  | 101.49 | 91.47  | 156.58 | 68.88  | 58.08 | 72.18  | 82.64  |
| chr6 | 33138892 | 33138944 | COL11A2 | 32.45  | 44.11  | 31.43  | 34.17  | 57.28  | 31.57  | 43.53  | 59.74  | 47.64  | 81.57  | 37.08  | 30.68 | 40.72  | 44.27  |
| chr6 | 33139049 | 33139101 | COL11A2 | 43.94  | 46.74  | 49.51  | 45.04  | 61.83  | 35.89  | 64.06  | 103.08 | 59.60  | 101.87 | 48.34  | 40.75 | 44.77  | 58.39  |
| chr6 | 33139245 | 33139351 | COL11A2 | 32.36  | 44.03  | 32.73  | 47.22  | 63.25  | 47.33  | 46.18  | 71.35  | 50.49  | 84.44  | 32.10  | 27.98 | 37.77  | 48.29  |
| chr6 | 33139491 | 33139597 | COL11A2 | 67.52  | 85.47  | 52.19  | 70.75  | 109.65 | 55.72  | 91.05  | 116.69 | 100.79 | 147.07 | 75.06  | 57.21 | 62.32  | 85.76  |
| chr6 | 33139828 | 33139880 | COL11A2 | 50.43  | 43.89  | 24.81  | 40.75  | 74.36  | 34.26  | 50.75  | 73.30  | 65.81  | 81.42  | 44.53  | 26.87 | 45.83  | 50.93  |
| chr6 | 33140067 | 33140155 | COL11A2 | 36.55  | 59.63  | 38.08  | 49.49  | 56.37  | 40.20  | 65.03  | 67.38  | 70.45  | 80.06  | 57.97  | 42.11 | 53.11  | 55.28  |
| chr6 | 33140308 | 33140414 | COL11A2 | 37.23  | 49.79  | 49.81  | 50.27  | 69.65  | 43.96  | 53.79  | 64.78  | 64.70  | 110.15 | 47.43  | 46.26 | 52.72  | 57.32  |
| chr6 | 33140838 | 33140890 | COL11A2 | 48.36  | 63.42  | 41.15  | 54.62  | 82.45  | 38.09  | 54.89  | 86.79  | 59.47  | 134.68 | 56.57  | 41.53 | 72.75  | 63.50  |
| chr6 | 33141126 | 33141178 | COL11A2 | 28.81  | 22.87  | 18.64  | 29.34  | 39.51  | 22.70  | 31.89  | 30.23  | 26.64  | 61.74  | 30.15  | 21.74 | 27.04  | 30.35  |
| chr6 | 33141280 | 33141332 | COL11A2 | 21.83  | 20.45  | 17.62  | 19.30  | 24.34  | 19.89  | 27.13  | 21.66  | 22.15  | 43.19  | 27.42  | 22.55 | 14.91  | 23.96  |
| chr6 | 33141479 | 33141522 | COL11A2 | 36.61  | 43.82  | 41.00  | 49.02  | 63.64  | 44.30  | 55.25  | 68.91  | 47.64  | 92.34  | 26.32  | 38.75 | 47.25  | 50.63  |
| chr6 | 33141651 | 33141703 | COL11A2 | 81.58  | 93.43  | 69.15  | 74.36  | 120.26 | 70.15  | 102.36 | 109.89 | 114.70 | 170.11 | 72.13  | 58.79 | 87.23  | 94.74  |
| chr6 | 33141789 | 33141832 | COL11A2 | 94.34  | 94.48  | 74.25  | 66.89  | 118.61 | 66.36  | 96.00  | 94.91  | 113.41 | 184.89 | 109.84 | 54.86 | 121.75 | 97.40  |
| chr6 | 33141943 | 33141995 | COL11A2 | 28.70  | 49.15  | 31.91  | 29.83  | 51.51  | 37.89  | 46.15  | 45.36  | 52.66  | 71.47  | 40.38  | 27.19 | 59.15  | 42.68  |
| chr6 | 33142305 | 33142357 | COL11A2 | 25.89  | 50.17  | 29.40  | 30.58  | 59.49  | 24.96  | 31.09  | 47.09  | 51.89  | 52.26  | 36.85  | 24.26 | 33.68  | 38.66  |
| chr6 | 33143352 | 33143458 | COL11A2 | 44.98  | 49.16  | 42.90  | 46.48  | 69.52  | 46.63  | 44.71  | 73.28  | 52.99  | 105.30 | 45.47  | 25.35 | 45.90  | 53.90  |
| chr6 | 33143794 | 33143846 | COL11A2 | 54.04  | 69.30  | 41.36  | 65.34  | 74.11  | 40.36  | 56.21  | 99.68  | 75.19  | 116.66 | 60.32  | 36.08 | 63.26  | 65.72  |
| chr6 | 33144037 | 33144080 | COL11A2 | 17.09  | 33.93  | 14.80  | 11.16  | 21.32  | 16.70  | 29.77  | 36.16  | 33.61  | 37.02  | 25.95  | 22.23 | 34.16  | 24.98  |
| chr6 | 33144211 | 33144263 | COL11A2 | 26.17  | 26.04  | 18.66  | 20.32  | 28.94  | 27.92  | 29.96  | 34.38  | 28.55  | 40.09  | 22.68  | 18.94 | 24.98  | 26.89  |
| chr6 | 33144499 | 33144542 | COL11A2 | 11.36  | 10.18  | 22.55  | 21.36  | 13.86  | 25.05  | 22.55  | 23.66  | 13.05  | 12.45  | 17.43  | 11.09 | 13.75  | 17.05  |
| chr6 | 33144770 | 33144822 | COL11A2 | 34.28  | 38.28  | 38.53  | 48.94  | 59.58  | 37.87  | 40.89  | 60.91  | 49.38  | 72.30  | 32.58  | 26.25 | 48.06  | 44.98  |
| chr6 | 33144959 | 33145002 | COL11A2 | 62.61  | 84.75  | 57.27  | 60.59  | 100.05 | 62.05  | 94.52  | 105.89 | 125.59 | 124.73 | 95.23  | 56.02 | 88.68  | 85.77  |
| chr6 | 33145190 | 33145242 | COL11A2 | 46.30  | 58.40  | 29.58  | 43.26  | 67.66  | 28.19  | 56.47  | 76.38  | 65.92  | 75.62  | 43.00  | 39.43 | 48.60  | 52.52  |
| chr6 | 33145440 | 33145483 | COL11A2 | 40.43  | 71.80  | 51.98  | 57.30  | 84.86  | 40.89  | 77.50  | 92.84  | 85.18  | 138.14 | 63.05  | 49.20 | 61.98  | 71.10  |
| chr6 | 33145910 | 33145962 | COL11A2 | 54.83  | 64.85  | 41.57  | 49.58  | 69.75  | 42.53  | 72.43  | 97.66  | 71.94  | 125.30 | 55.75  | 42.74 | 63.92  | 65.75  |
| chr6 | 33146086 | 33146129 | COL11A2 | 67.00  | 80.34  | 62.50  | 59.36  | 108.84 | 53.30  | 87.73  | 107.68 | 102.57 | 146.14 | 66.95  | 75.00 | 75.61  | 84.78  |
| chr6 | 33146213 | 33146265 | COL11A2 | 67.87  | 68.13  | 47.15  | 54.64  | 89.28  | 69.45  | 76.89  | 87.87  | 88.40  | 138.08 | 64.28  | 75.47 | 71.85  | 77.29  |
| chr6 | 33146457 | 33146509 | COL11A2 | 75.38  | 107.21 | 83.08  | 84.74  | 108.58 | 72.53  | 115.04 | 151.11 | 118.89 | 164.72 | 87.34  | 80.62 | 95.75  | 104.10 |
| chr6 | 33146698 | 33146750 | COL11A2 | 43.40  | 61.85  | 40.06  | 52.21  | 82.36  | 42.40  | 48.92  | 70.64  | 65.83  | 98.04  | 46.49  | 34.83 | 51.42  | 57.25  |
| chr6 | 33146851 | 33146903 | COL11A2 | 35.38  | 46.38  | 70.83  | 50.55  | 38.13  | 111.94 | 45.25  | 71.51  | 61.36  | 56.32  | 28.51  | 29.60 | 38.13  | 53.81  |
| chr6 | 33147009 | 33147061 | COL11A2 | 69.13  | 70.26  | 51.43  | 60.42  | 90.02  | 45.08  | 70.85  | 88.74  | 78.53  | 138.72 | 72.67  | 60.43 | 82.17  | 74.67  |
| chr6 | 33147209 | 33147264 | COL11A2 | 88.55  | 81.70  | 73.63  | 104.75 | 125.05 | 66.43  | 104.52 | 125.64 | 102.75 | 234.55 | 94.04  | 68.13 | 108.16 | 105.81 |
| chr6 | 33147497 | 33147582 | COL11A2 | 33.01  | 42.91  | 26.65  | 37.09  | 71.13  | 34.33  | 48.17  | 53.36  | 52.37  | 67.64  | 52.02  | 43.35 | 34.08  | 46.84  |
| chr6 | 33148036 | 33148109 | COL11A2 | 26.80  | 31.00  | 16.82  | 18.11  | 41.08  | 19.20  | 37.28  | 36.85  | 51.58  | 39.86  | 38.61  | 19.59 | 31.69  | 31.40  |
| chr6 | 33148446 | 33148507 | COL11A2 | 16.34  | 29.21  | 15.29  | 24.13  | 34.19  | 20.40  | 25.65  | 41.44  | 29.60  | 44.26  | 26.15  | 15.87 | 23.47  | 26.88  |
| chr6 | 33148742 | 33148782 | COL11A2 | 32.78  | 48.34  | 31.63  | 41.00  | 40.20  | 46.95  | 43.07  | 60.05  | 46.41  | 67.63  | 56.27  | 32.63 | 42.05  | 45.58  |
| chr6 | 33148889 | 33148947 | COL11A2 | 65.73  | 67.76  | 53.93  | 67.85  | 83.02  | 62.44  | 69.53  | 106.00 | 83.86  | 111.73 | 72.85  | 50.31 | 77.58  | 74.58  |
| chr6 | 33151923 | 33152101 | COL11A2 | 65.03  | 84.05  | 54.42  | 47.74  | 85.67  | 58.65  | 75.97  | 96.16  | 83.58  | 102.58 | 66.70  | 50.30 | 74.30  | 72.57  |
| chr6 | 33152770 | 33152831 | COL11A2 | 22.03  | 26.85  | 23.19  | 26.31  | 45.47  | 19.23  | 25.00  | 36.92  | 29.44  | 65.35  | 22.02  | 15.16 | 21.02  | 29.75  |
| chr6 | 33153479 | 33153555 | COL11A2 | 17.83  | 20.43  | 12.01  | 10.13  | 20.45  | 13.51  | 23.01  | 41.78  | 20.58  | 23.57  | 29.25  | 11.18 | 20.78  | 20.31  |
| chr6 | 33154330 | 33154595 | COL11A2 | 52.24  | 69.54  | 45.35  | 49.50  | 70.30  | 47.11  | 85.00  | 106.23 | 76.73  | 96.53  | 58.18  | 43.33 | 71.08  | 66.67  |
| chr6 | 33156140 | 33156301 | COL11A2 | 32.59  | 39.19  | 34.10  | 36.98  | 52.25  | 25.54  | 49.75  | 59.91  | 50.59  | 61.64  | 42.94  | 25.91 | 36.22  | 42.62  |
| chr6 | 33156756 | 33156965 | COL11A2 | 42.40  | 62.28  | 36.37  | 52.14  | 74.74  | 40.81  | 57.41  | 84.61  | 66.76  | 85.34  | 50.20  | 47.85 | 43.77  | 58.41  |
| chr6 | 33157098 | 33157246 | COL11A2 | 58.80  | 87.27  | 57.80  | 82.81  | 123.54 | 58.59  | 72.83  | 110.48 | 88.44  | 153.28 | 76.22  | 51.70 | 70.26  | 84.81  |
| chr6 | 33159937 | 33160017 | COL11A2 | 16.75  | 15.31  | 17.58  | 17.53  | 43.96  | 16.22  | 16.51  | 19.40  | 21.30  | 57.28  | 18.11  | 14.25 | 21.56  | 22.85  |
| chr6 | 35773449 | 35773859 | LHFPL5  | 104.68 | 105.98 | 91.06  | 111.82 | 173.80 | 103.72 | 121.88 | 161.67 | 137.58 | 241.19 | 110.96 | 85.19 | 132.51 | 129.13 |
| chr6 | 35782324 | 35782559 | LHFPL5  | 83.32  | 83.47  | 55.28  | 78.02  | 126.50 | 51.31  | 86.97  | 123.22 | 86.65  | 198.32 | 93.43  | 56.54 | 88.05  | 93.59  |
| chr6 | 35787215 | 35787240 | LHFPL5  | 52.38  | 106.88 | 61.92  | 54.12  | 88.08  | 49.69  | 93.58  | 155.62 | 112.65 | 47.96  | 63.35  | 57.54 | 61.88  | 78.65  |
| chr6 | 76527219 | 76527381 | MYO6    | 46.12  | 92.55  | 50.85  | 45.37  | 84.23  | 53.69  | 93.82  | 99.25  | 106.83 | 45.21  | 66.28  | 48.86 | 53.09  | 69.42  |
| chr6 | 76532500 | 76532568 | MYO6    | 36.29  | 67.83  | 49.80  | 35.35  | 44.83  | 35.59  | 56.03  | 57.55  | 75.99  | 2.00   | 40.67  | 35.48 | 32.65  | 44.78  |
| chr6 | 76538258 | 76538330 | MYO6    | 22.07  | 51.68  | 40.66  | 16.63  | 32.77  | 25.62  | 41.56  | 68.86  | 55.77  | 0.53   | 24.41  | 27.64 | 22.40  | 34.02  |
| chr6 | 76540134 | 76540262 | MYO6    | 26.92  | 51.91  | 45.36  | 32.16  | 39.22  | 25.47  | 49.01  | 61.62  | 81.47  | 0.00   | 34.30  | 39.48 | 35.83  | 40.58  |
| chr6 | 76542560 | 76542664 | MYO6    | 52.31  | 98.46  | 60.69  | 27.28  | 57.10  | 66.21  | 77.46  | 86.44  | 104.32 | 5.67   | 67.42  | 49.16 | 49.06  | 62.71  |
| chr6 | 76545619 | 76545673 | MYO6    | 25.00  | 35.58  | 26.91  | 25.49  | 43.85  | 22.71  | 42.62  | 65.91  | 56.00  | 0.00   | 30.93  | 23.95 | 25.05  | 33.25  |
| chr6 | 76550303 | 76550399 | MYO6    | 35.34  | 52.96  | 35.03  | 28.76  | 45.40  | 37.37  | 49.54  | 84.72  | 74.35  | 18.37  | 37.59  | 42.84 | 29.30  | 45.19  |
| chr6 | 76550932 | 76551095 | MYO6    | 9.87   | 36.84  | 27.05  | 11.43  | 28.56  | 20.18  | 34.05  | 31.02  | 36.75  | 1.65   | 21.55  | 24.45 | 18.94  | 23.62  |
| chr6 | 76554615 | 76554694 | MYO6    | 36.68  | 73.40  | 47.56  | 30.63  | 43.80  | 35.50  | 71.13  | 75.93  | 79.31  | 1.00   | 48.49  | 43.91 | 37.74  | 48.94  |
| chr6 | 76558069 | 76558248 | MYO6    | 85.72  | 143.87 | 102.36 | 72.87  | 105.26 | 90.11  | 154.04 | 191.27 | 158.69 | 33.06  | 98.04  | 75.03 | 97.07  | 109.19 |
| chr6 | 76564857 | 76565000 | MYO6    | 78.85  | 87.03  | 82.67  |        |        |        |        |        |        |        |        |       |        |        |

|      |           |           |       |        |        |        |        |        |        |        |        |        |        |        |        |        |        |
|------|-----------|-----------|-------|--------|--------|--------|--------|--------|--------|--------|--------|--------|--------|--------|--------|--------|--------|
| chr6 | 76600946  | 76601023  | MYO6  | 30.24  | 50.77  | 33.82  | 37.60  | 47.59  | 19.38  | 46.99  | 45.03  | 49.94  | 3.27   | 52.22  | 28.72  | 33.92  | 37.13  |
| chr6 | 76602248  | 76602407  | MYO6  | 24.83  | 24.60  | 22.37  | 23.76  | 38.98  | 20.81  | 34.94  | 36.29  | 31.73  | 42.04  | 23.62  | 21.58  | 31.21  | 28.80  |
| chr6 | 76604949  | 76604977  | MYO6  | 39.66  | 77.69  | 39.48  | 33.17  | 44.45  | 51.00  | 55.59  | 90.72  | 74.62  | 0.00   | 43.48  | 46.97  | 46.59  | 49.74  |
| chr6 | 76608091  | 76608128  | MYO6  | 23.68  | 38.05  | 27.37  | 20.71  | 26.89  | 22.92  | 34.97  | 58.58  | 40.34  | 3.00   | 25.39  | 26.66  | 26.47  | 29.05  |
| chr6 | 76617323  | 76617425  | MYO6  | 77.17  | 131.24 | 84.70  | 72.02  | 92.35  | 55.34  | 116.87 | 179.41 | 148.04 | 11.16  | 101.49 | 60.46  | 90.44  | 94.19  |
| chr6 | 76618214  | 76618344  | MYO6  | 50.48  | 102.84 | 66.11  | 50.47  | 76.60  | 52.46  | 86.54  | 145.44 | 114.38 | 0.86   | 57.93  | 55.97  | 53.86  | 71.67  |
| chr6 | 76621390  | 76621415  | MYO6  | 21.81  | 58.88  | 38.88  | 18.46  | 39.50  | 37.69  | 44.08  | 89.08  | 73.38  | 2.00   | 35.38  | 34.88  | 26.85  | 41.17  |
| chr6 | 76623781  | 76623998  | MYO6  | 38.03  | 59.68  | 31.14  | 40.94  | 44.00  | 38.36  | 54.22  | 58.73  | 53.69  | 58.70  | 45.76  | 31.93  | 43.61  | 46.27  |
| chr6 | 76624531  | 76624729  | MYO6  | 17.50  | 37.41  | 19.39  | 22.26  | 28.40  | 19.41  | 25.20  | 40.09  | 35.13  | 27.15  | 23.16  | 10.77  | 20.52  | 25.49  |
| chr6 | 133595855 | 133595951 | EYA4  | 38.18  | 52.90  | 42.48  | 41.68  | 56.97  | 42.37  | 63.06  | 77.77  | 60.15  | 1.53   | 54.95  | 34.95  | 53.61  | 47.25  |
| chr6 | 133703531 | 133703579 | EYA4  | 50.53  | 84.90  | 43.29  | 60.65  | 62.55  | 38.94  | 91.24  | 104.84 | 89.55  | 0.69   | 46.69  | 39.57  | 46.06  | 59.45  |
| chr6 | 133767769 | 133767892 | EYA4  | 47.61  | 77.67  | 56.12  | 42.58  | 77.50  | 38.16  | 72.55  | 114.53 | 100.61 | 5.46   | 51.16  | 48.73  | 44.66  | 61.06  |
| chr6 | 133769250 | 133769317 | EYA4  | 62.22  | 124.22 | 87.68  | 86.46  | 88.99  | 64.07  | 107.37 | 190.44 | 146.21 | 29.35  | 93.90  | 73.35  | 77.35  | 96.19  |
| chr6 | 133777695 | 133777786 | EYA4  | 79.52  | 122.40 | 69.76  | 70.67  | 133.73 | 48.84  | 100.75 | 146.23 | 112.51 | 79.55  | 101.53 | 80.24  | 90.91  | 95.48  |
| chr6 | 133782253 | 133782318 | EYA4  | 71.95  | 156.27 | 126.26 | 109.82 | 150.09 | 83.59  | 205.33 | 270.23 | 200.95 | 3.56   | 119.68 | 110.74 | 102.52 | 134.04 |
| chr6 | 133783474 | 133783615 | EYA4  | 96.11  | 171.09 | 100.83 | 108.11 | 149.52 | 106.86 | 137.70 | 214.28 | 187.95 | 92.94  | 113.46 | 95.87  | 97.82  | 131.23 |
| chr6 | 133783760 | 133783902 | EYA4  | 47.52  | 83.07  | 55.25  | 37.34  | 68.05  | 46.78  | 76.10  | 106.61 | 77.94  | 43.00  | 56.85  | 44.18  | 57.06  | 61.89  |
| chr6 | 133785918 | 133785996 | EYA4  | 31.49  | 80.38  | 50.56  | 23.96  | 54.82  | 49.82  | 77.80  | 106.65 | 80.44  | 1.00   | 42.47  | 53.54  | 35.73  | 54.41  |
| chr6 | 133789705 | 133789887 | EYA4  | 71.95  | 136.89 | 81.99  | 70.85  | 97.30  | 78.57  | 129.89 | 181.84 | 138.19 | 27.49  | 81.28  | 80.72  | 88.01  | 98.08  |
| chr6 | 133802602 | 133802737 | EYA4  | 32.26  | 32.13  | 24.00  | 25.36  | 24.62  | 19.76  | 36.84  | 42.42  | 42.56  | 3.77   | 29.22  | 25.46  | 30.35  | 28.20  |
| chr6 | 133804171 | 133804253 | EYA4  | 107.63 | 239.11 | 127.54 | 84.65  | 118.06 | 104.46 | 206.93 | 269.63 | 256.37 | 38.75  | 129.43 | 136.19 | 88.66  | 151.56 |
| chr6 | 133827245 | 133827333 | EYA4  | 34.09  | 67.19  | 49.92  | 34.08  | 55.01  | 49.47  | 64.19  | 65.87  | 81.64  | 7.81   | 38.51  | 37.82  | 41.94  | 48.80  |
| chr6 | 133833860 | 133833917 | EYA4  | 68.29  | 145.71 | 79.93  | 64.31  | 111.81 | 86.74  | 127.72 | 206.84 | 176.72 | 10.88  | 93.10  | 81.26  | 74.81  | 104.44 |
| chr6 | 133834017 | 133834176 | EYA4  | 86.91  | 144.49 | 84.97  | 72.53  | 115.00 | 64.64  | 139.95 | 187.41 | 147.73 | 50.57  | 96.88  | 88.62  | 78.28  | 106.64 |
| chr6 | 133836460 | 133836573 | EYA4  | 49.95  | 96.04  | 58.14  | 67.31  | 83.22  | 56.77  | 87.23  | 107.41 | 91.92  | 14.21  | 75.37  | 57.05  | 74.79  | 70.39  |
| chr6 | 133844195 | 133844315 | EYA4  | 53.78  | 94.35  | 53.85  | 43.44  | 86.82  | 72.21  | 88.90  | 109.26 | 119.85 | 0.62   | 73.03  | 59.61  | 67.66  | 71.31  |
| chr6 | 133846154 | 133846253 | EYA4  | 70.05  | 109.16 | 67.38  | 75.59  | 68.03  | 67.58  | 99.91  | 170.19 | 116.85 | 33.33  | 74.07  | 54.84  | 75.33  | 83.92  |
| chr6 | 133846293 | 133846392 | EYA4  | 95.24  | 162.61 | 89.64  | 88.99  | 117.69 | 76.47  | 129.29 | 222.22 | 168.96 | 47.70  | 106.87 | 68.84  | 101.36 | 114.54 |
| chr6 | 133849864 | 133849943 | EYA4  | 56.36  | 79.88  | 56.34  | 54.44  | 77.89  | 59.89  | 87.46  | 122.96 | 101.45 | 43.78  | 61.35  | 54.21  | 59.23  | 71.33  |
| chr7 | 24738646  | 24738878  | DFNA5 | 60.31  | 86.82  | 64.35  | 53.47  | 97.58  | 47.24  | 100.64 | 120.64 | 100.98 | 28.49  | 70.35  | 47.78  | 71.42  | 73.22  |
| chr7 | 24742380  | 24742452  | DFNA5 | 25.93  | 30.42  | 19.30  | 27.40  | 44.68  | 18.18  | 42.00  | 61.33  | 52.16  | 44.67  | 35.34  | 34.42  | 23.93  | 36.32  |
| chr7 | 24745804  | 24745995  | DFNA5 | 16.37  | 32.36  | 15.72  | 22.30  | 29.21  | 20.61  | 28.36  | 51.12  | 37.35  | 41.07  | 28.63  | 25.16  | 23.28  | 29.02  |
| chr7 | 24747747  | 24747873  | DFNA5 | 23.56  | 43.23  | 33.39  | 35.20  | 49.53  | 33.24  | 42.34  | 42.67  | 62.43  | 63.82  | 49.05  | 29.79  | 33.57  | 42.35  |
| chr7 | 24749844  | 24750007  | DFNA5 | 18.57  | 32.10  | 26.58  | 27.58  | 36.03  | 17.87  | 33.00  | 44.75  | 42.13  | 43.44  | 26.41  | 15.79  | 27.37  | 30.35  |
| chr7 | 24756874  | 24756993  | DFNA5 | 63.32  | 100.86 | 78.88  | 104.63 | 171.08 | 102.85 | 118.02 | 172.13 | 112.88 | 250.91 | 109.87 | 73.77  | 130.67 | 121.60 |
| chr7 | 24758667  | 24758837  | DFNA5 | 27.90  | 22.37  | 49.37  | 35.35  | 24.77  | 48.07  | 35.07  | 41.87  | 35.07  | 23.80  | 17.49  | 25.57  | 16.63  | 32.22  |
| chr7 | 24784182  | 24784373  | DFNA5 | 53.67  | 82.87  | 59.30  | 57.86  | 89.57  | 57.84  | 85.87  | 120.87 | 96.40  | 125.89 | 60.61  | 63.79  | 61.98  | 79.54  |
| chr7 | 24789184  | 24789412  | DFNA5 | 42.42  | 65.99  | 33.57  | 33.83  | 55.49  | 32.87  | 60.57  | 88.99  | 82.22  | 20.80  | 50.64  | 36.61  | 42.72  | 50.33  |
| chr7 | 45614144  | 45614781  | ADCY1 | 28.81  | 22.03  | 14.77  | 28.04  | 45.73  | 18.30  | 27.58  | 36.63  | 34.91  | 53.11  | 26.29  | 15.22  | 31.40  | 29.28  |
| chr7 | 45632359  | 45632507  | ADCY1 | 112.47 | 129.40 | 88.48  | 142.85 | 202.29 | 87.08  | 167.11 | 233.82 | 146.25 | 287.19 | 138.27 | 78.77  | 121.15 | 151.16 |
| chr7 | 45649979  | 45650096  | ADCY1 | 104.09 | 112.05 | 78.78  | 69.95  | 125.06 | 70.40  | 114.22 | 182.39 | 107.49 | 192.98 | 105.02 | 63.08  | 106.00 | 110.46 |
| chr7 | 45662232  | 45662342  | ADCY1 | 30.20  | 42.61  | 28.53  | 24.77  | 45.21  | 22.80  | 38.64  | 66.77  | 55.82  | 59.07  | 31.53  | 29.72  | 36.06  | 39.64  |
| chr7 | 45688270  | 45688396  | ADCY1 | 77.80  | 110.94 | 67.21  | 80.19  | 112.00 | 80.86  | 109.79 | 170.65 | 119.62 | 174.16 | 107.20 | 65.50  | 94.21  | 106.33 |
| chr7 | 45697327  | 45697484  | ADCY1 | 45.72  | 38.33  | 22.86  | 37.03  | 66.16  | 27.43  | 42.32  | 60.18  | 56.73  | 95.22  | 40.08  | 25.58  | 51.94  | 46.47  |
| chr7 | 45699642  | 45699782  | ADCY1 | 49.65  | 98.21  | 62.28  | 81.14  | 96.77  | 67.62  | 87.97  | 142.30 | 99.54  | 122.54 | 71.78  | 54.53  | 63.70  | 86.19  |
| chr7 | 45701659  | 45701813  | ADCY1 | 65.30  | 92.72  | 57.52  | 68.09  | 90.23  | 51.38  | 91.17  | 140.62 | 114.70 | 101.83 | 80.70  | 73.26  | 80.04  | 85.63  |
| chr7 | 45703889  | 45703974  | ADCY1 | 31.78  | 39.65  | 26.01  | 38.10  | 61.49  | 37.44  | 52.71  | 72.85  | 49.99  | 92.03  | 41.67  | 24.86  | 50.66  | 47.38  |
| chr7 | 45717469  | 45717662  | ADCY1 | 100.98 | 147.23 | 93.15  | 99.76  | 165.56 | 89.20  | 136.57 | 164.84 | 143.16 | 210.00 | 113.25 | 92.16  | 107.03 | 129.66 |
| chr7 | 45717766  | 45717862  | ADCY1 | 53.31  | 77.68  | 48.43  | 60.41  | 99.91  | 40.05  | 77.23  | 111.07 | 64.82  | 120.44 | 76.82  | 39.80  | 60.65  | 72.50  |
| chr7 | 45719309  | 45719392  | ADCY1 | 65.07  | 108.48 | 71.56  | 70.90  | 113.95 | 77.90  | 119.29 | 190.10 | 140.17 | 132.63 | 82.19  | 53.48  | 69.27  | 102.14 |
| chr7 | 45724579  | 45724667  | ADCY1 | 70.61  | 93.98  | 62.04  | 60.58  | 96.37  | 69.42  | 110.82 | 169.18 | 115.18 | 71.36  | 88.85  | 55.64  | 75.28  | 88.67  |
| chr7 | 45725562  | 45725814  | ADCY1 | 66.11  | 78.26  | 58.01  | 71.26  | 112.35 | 47.34  | 82.35  | 105.92 | 92.67  | 167.44 | 81.14  | 43.99  | 75.50  | 83.90  |
| chr7 | 45726147  | 45726272  | ADCY1 | 56.93  | 50.02  | 27.62  | 55.76  | 88.50  | 28.90  | 57.98  | 69.85  | 60.61  | 122.71 | 50.38  | 46.43  | 56.82  | 59.64  |
| chr7 | 45742976  | 45743091  | ADCY1 | 34.74  | 35.19  | 23.80  | 44.14  | 56.35  | 39.30  | 45.47  | 60.88  | 37.02  | 82.52  | 47.85  | 35.09  | 42.24  | 45.20  |
| chr7 | 45743200  | 45743345  | ADCY1 | 125.32 | 125.24 | 86.71  | 145.52 | 187.42 | 105.62 | 144.47 | 215.08 | 140.55 | 297.35 | 143.12 | 98.93  | 148.95 | 151.28 |
| chr7 | 45744118  | 45744215  | ADCY1 | 21.57  | 51.58  | 33.45  | 32.83  | 38.21  | 34.58  | 47.00  | 67.74  | 56.05  | 75.14  | 36.38  | 35.61  | 34.81  | 44.18  |
| chr7 | 45747950  | 45748063  | ADCY1 | 38.21  | 66.74  | 46.22  | 45.18  | 75.47  | 38.88  | 67.00  | 107.61 | 79.52  | 63.48  | 48.51  | 35.98  | 42.41  | 59.40  |
| chr7 | 45750128  | 45750251  | ADCY1 | 76.65  | 105.34 | 65.33  | 83.60  | 107.23 | 59.34  | 89.93  | 142.19 | 125.15 | 185.65 | 89.50  | 55.62  | 69.66  | 98.79  |
| chr7 | 45753293  | 45753594  | ADCY1 | 56.69  | 74.54  | 43.70  | 63.56  | 77.40  | 53.69  | 73.29  | 114.25 | 74.28  | 138.03 | 77.92  | 49.90  | 76.80  | 74.77  |
| chr7 | 81331898  | 81332073  | HGF   | 162.02 | 271.25 | 172.89 | 146.75 | 202.39 | 120.70 | 229.49 | 300.44 | 261.01 | 55.43  | 179.17 | 152.08 | 165.62 | 187.80 |
| chr7 | 81334707  | 81334851  | HGF   | 38.86  | 73.16  | 35.72  | 39.36  | 59.39  | 47.61  | 72.08  | 93.04  | 81.77  | 2.79   | 34.72  | 46.24  | 37.34  | 52.06  |
| chr7 | 81334964  | 81335069  | HGF   | 54.05  | 106.84 | 49.24  | 55.92  | 88.10  | 54.06  | 103.26 | 99.21  | 110.20 | 13.58  | 67.43  | 51.64  | 61.22  | 71.13  |
| chr7 | 81335604  | 81335743  | HGF   | 110.86 | 190.39 | 134.80 | 124.06 | 156.85 | 120.82 | 198.04 | 246.54 | 238.80 | 12.95  | 162.10 | 123.96 | 126.77 | 151.68 |
| chr7 | 81336607  | 81336680  | HGF   | 34.26  | 70.14  | 40.53  | 31.39  | 50.42  | 51.11  | 62.49  | 64.38  | 87.59  | 1.91   | 41.46  | 35.27  | 39.23  | 47.58  |
| chr7 | 81339464  | 81339559  | HGF   | 40.89  | 79.63  | 37.05  | 31.20  | 70.73  | 42.60  | 75.54  | 113.36 | 87.81  | 11.95  | 41.41  | 38.39  | 46.90  | 55.88  |
| chr7 | 81340798  | 81340835  | HGF   | 10.76  |        |        |        |        |        |        |        |        |        |        |        |        |        |

|      |           |           |         |        |        |        |        |        |        |        |        |        |        |        |        |        |        |
|------|-----------|-----------|---------|--------|--------|--------|--------|--------|--------|--------|--------|--------|--------|--------|--------|--------|--------|
| chr7 | 107312584 | 107312693 | SLC26A4 | 54.73  | 116.59 | 73.96  | 49.05  | 85.76  | 58.29  | 117.53 | 159.19 | 134.95 | 0.88   | 60.78  | 63.57  | 56.92  | 81.27  |
| chr7 | 107314610 | 107314793 | SLC26A4 | 39.09  | 47.03  | 48.74  | 34.54  | 50.47  | 37.47  | 71.49  | 72.08  | 73.04  | 11.10  | 53.05  | 42.20  | 38.78  | 48.36  |
| chr7 | 107315391 | 107315554 | SLC26A4 | 69.96  | 109.50 | 61.31  | 56.03  | 68.27  | 58.43  | 118.26 | 159.28 | 140.81 | 25.93  | 72.72  | 55.23  | 56.99  | 82.98  |
| chr7 | 107323648 | 107323799 | SLC26A4 | 25.05  | 40.11  | 35.72  | 19.96  | 29.32  | 29.43  | 50.72  | 63.26  | 60.44  | 1.98   | 23.47  | 33.23  | 32.73  | 34.39  |
| chr7 | 107323901 | 107323982 | SLC26A4 | 39.43  | 65.02  | 60.32  | 45.26  | 61.67  | 51.89  | 81.82  | 118.12 | 94.22  | 4.22   | 63.98  | 58.02  | 54.10  | 62.00  |
| chr7 | 107329499 | 107329645 | SLC26A4 | 54.50  | 83.59  | 44.31  | 64.87  | 90.56  | 56.97  | 87.52  | 152.42 | 105.88 | 63.91  | 66.03  | 60.61  | 72.54  | 77.60  |
| chr7 | 107330570 | 107330682 | SLC26A4 | 78.21  | 136.75 | 81.77  | 89.18  | 111.26 | 99.99  | 136.72 | 208.99 | 171.77 | 95.84  | 100.16 | 82.37  | 84.27  | 116.08 |
| chr7 | 107334849 | 107334925 | SLC26A4 | 69.79  | 86.03  | 52.29  | 51.78  | 83.81  | 53.26  | 91.38  | 150.30 | 120.52 | 53.90  | 71.58  | 61.70  | 75.23  | 78.86  |
| chr7 | 107335067 | 107335161 | SLC26A4 | 80.13  | 154.80 | 80.23  | 88.17  | 133.58 | 86.46  | 136.00 | 201.27 | 165.97 | 49.47  | 109.07 | 91.29  | 97.96  | 114.70 |
| chr7 | 107336379 | 107336484 | SLC26A4 | 64.81  | 136.68 | 76.33  | 60.78  | 83.49  | 55.18  | 121.26 | 153.68 | 118.37 | 8.25   | 85.25  | 78.70  | 62.75  | 86.90  |
| chr7 | 107338488 | 107338556 | SLC26A4 | 74.84  | 152.12 | 72.68  | 81.32  | 112.13 | 69.36  | 156.38 | 179.81 | 145.20 | 50.57  | 87.67  | 80.19  | 96.96  | 105.19 |
| chr7 | 107340529 | 107340620 | SLC26A4 | 20.92  | 66.28  | 22.57  | 23.37  | 32.73  | 29.97  | 46.61  | 61.57  | 65.08  | 2.09   | 26.71  | 38.33  | 27.50  | 36.35  |
| chr7 | 107341547 | 107341641 | SLC26A4 | 41.11  | 71.08  | 38.43  | 36.11  | 56.22  | 36.80  | 80.44  | 83.94  | 87.34  | 0.00   | 43.16  | 40.94  | 41.76  | 51.30  |
| chr7 | 107342273 | 107342502 | SLC26A4 | 98.54  | 154.55 | 100.82 | 93.16  | 130.89 | 84.57  | 156.30 | 257.20 | 172.37 | 48.81  | 98.09  | 88.99  | 102.42 | 123.69 |
| chr7 | 107344777 | 107344830 | SLC26A4 | 59.54  | 132.39 | 98.98  | 54.83  | 81.17  | 74.44  | 126.24 | 192.41 | 157.67 | 1.96   | 78.02  | 89.54  | 56.30  | 95.60  |
| chr7 | 107350500 | 107350644 | SLC26A4 | 46.03  | 85.17  | 45.56  | 43.11  | 62.86  | 49.71  | 79.59  | 111.99 | 98.68  | 8.46   | 49.74  | 57.90  | 43.91  | 61.57  |
| chr7 | 107352985 | 107353067 | SLC26A4 | 41.58  | 91.93  | 64.94  | 46.02  | 69.19  | 42.58  | 106.99 | 114.18 | 99.47  | 3.59   | 56.51  | 54.67  | 53.83  | 65.97  |
| chr7 | 107355869 | 107355891 | SLC26A4 | 98.61  | 154.61 | 104.61 | 102.57 | 115.83 | 105.52 | 154.91 | 172.30 | 171.52 | 16.00  | 115.43 | 72.43  | 98.57  | 115.36 |
| chr7 | 116339126 | 116340338 | MET     | 115.49 | 188.92 | 129.68 | 118.17 | 164.14 | 119.56 | 207.31 | 293.03 | 224.20 | 91.42  | 133.43 | 124.87 | 126.84 | 159.18 |
| chr7 | 116371723 | 116371913 | MET     | 52.51  | 80.10  | 50.64  | 40.11  | 64.34  | 64.48  | 70.10  | 117.69 | 80.67  | 36.06  | 58.17  | 52.61  | 40.13  | 63.96  |
| chr7 | 116380005 | 116380138 | MET     | 72.82  | 107.34 | 70.34  | 77.59  | 106.70 | 71.57  | 128.87 | 192.19 | 144.05 | 48.34  | 95.47  | 63.96  | 94.44  | 98.27  |
| chr7 | 116380907 | 116381079 | MET     | 32.06  | 27.73  | 28.29  | 14.94  | 52.57  | 29.39  | 37.35  | 49.61  | 33.29  | 65.23  | 37.72  | 28.94  | 35.97  | 36.43  |
| chr7 | 116395410 | 116395569 | MET     | 69.60  | 139.16 | 87.39  | 70.23  | 99.89  | 67.43  | 116.23 | 121.26 | 148.30 | 35.44  | 100.16 | 57.28  | 84.04  | 92.70  |
| chr7 | 116397492 | 116397593 | MET     | 27.16  | 34.57  | 28.16  | 21.22  | 23.87  | 25.36  | 49.60  | 34.15  | 52.67  | 0.00   | 27.56  | 23.75  | 21.25  | 29.00  |
| chr7 | 116397693 | 116397828 | MET     | 54.50  | 99.15  | 52.25  | 49.00  | 62.99  | 71.60  | 85.34  | 118.50 | 125.11 | 8.42   | 40.12  | 45.93  | 49.96  | 67.74  |
| chr7 | 116398514 | 116398674 | MET     | 44.12  | 94.94  | 70.97  | 47.14  | 64.55  | 58.92  | 102.99 | 127.77 | 123.69 | 6.34   | 61.24  | 51.74  | 49.39  | 71.20  |
| chr7 | 116399392 | 116399544 | MET     | 106.98 | 154.25 | 94.23  | 101.49 | 145.65 | 98.84  | 173.50 | 259.20 | 189.63 | 50.01  | 118.96 | 108.30 | 110.30 | 133.42 |
| chr7 | 116403105 | 116403322 | MET     | 102.33 | 277.79 | 172.31 | 119.55 | 161.56 | 135.85 | 277.28 | 381.06 | 294.06 | 19.36  | 146.61 | 154.24 | 136.06 | 186.83 |
| chr7 | 116409700 | 116409920 | MET     | 57.70  | 104.06 | 72.14  | 59.71  | 98.11  | 61.88  | 124.58 | 142.53 | 130.74 | 31.87  | 73.02  | 76.87  | 74.61  | 86.10  |
| chr7 | 116411553 | 116411708 | MET     | 24.35  | 43.46  | 25.83  | 25.11  | 35.44  | 23.73  | 41.06  | 72.51  | 44.85  | 6.14   | 29.46  | 21.94  | 23.19  | 32.82  |
| chr7 | 116411904 | 116412043 | MET     | 68.51  | 97.92  | 49.57  | 61.04  | 88.59  | 55.88  | 104.91 | 148.00 | 123.98 | 28.79  | 78.74  | 68.67  | 66.27  | 81.22  |
| chr7 | 116414936 | 116415165 | MET     | 40.30  | 69.61  | 54.73  | 48.83  | 76.70  | 46.67  | 73.52  | 119.53 | 89.53  | 20.95  | 83.04  | 45.08  | 61.87  | 64.04  |
| chr7 | 116417444 | 116417523 | MET     | 46.01  | 115.53 | 79.98  | 51.94  | 59.91  | 70.74  | 109.25 | 138.99 | 129.45 | 15.41  | 81.50  | 63.75  | 61.06  | 80.20  |
| chr7 | 116418831 | 116419011 | MET     | 24.65  | 43.92  | 34.38  | 26.27  | 44.19  | 22.31  | 46.27  | 59.88  | 47.02  | 17.66  | 28.76  | 24.81  | 26.35  | 35.01  |
| chr7 | 116422043 | 116422151 | MET     | 68.72  | 107.39 | 74.01  | 52.73  | 85.52  | 60.12  | 118.97 | 157.98 | 111.04 | 10.45  | 71.28  | 71.81  | 63.51  | 82.50  |
| chr7 | 116423359 | 116423523 | MET     | 89.38  | 116.97 | 81.84  | 86.34  | 108.90 | 72.58  | 108.60 | 179.10 | 144.44 | 36.44  | 91.16  | 82.54  | 79.18  | 99.86  |
| chr7 | 116435710 | 116435845 | MET     | 29.82  | 39.81  | 43.12  | 34.03  | 44.13  | 30.32  | 38.58  | 77.82  | 62.20  | 19.06  | 40.64  | 38.74  | 36.85  | 41.52  |
| chr7 | 116435942 | 116436178 | MET     | 63.12  | 97.41  | 65.35  | 75.54  | 95.21  | 67.89  | 111.61 | 150.86 | 115.70 | 81.14  | 87.54  | 68.74  | 89.69  | 90.01  |
| chr8 | 102504999 | 102505017 | GRHL2   | 67.53  | 91.21  | 46.79  | 76.32  | 87.63  | 70.00  | 86.16  | 126.79 | 84.89  | 129.68 | 93.00  | 57.95  | 71.47  | 84.83  |
| chr8 | 102555470 | 102555664 | GRHL2   | 40.05  | 53.58  | 56.53  | 53.29  | 63.58  | 44.38  | 58.39  | 81.35  | 77.23  | 44.75  | 61.01  | 36.35  | 47.58  | 55.87  |
| chr8 | 102564944 | 102565010 | GRHL2   | 57.10  | 48.24  | 32.79  | 54.90  | 57.93  | 24.60  | 60.70  | 68.64  | 64.57  | 33.04  | 47.28  | 38.03  | 52.40  | 48.99  |
| chr8 | 102570648 | 102571040 | GRHL2   | 54.04  | 79.48  | 44.68  | 56.43  | 87.39  | 45.85  | 72.96  | 106.91 | 72.95  | 116.25 | 69.01  | 46.48  | 59.93  | 71.04  |
| chr8 | 102582568 | 102582622 | GRHL2   | 64.20  | 144.04 | 72.15  | 70.89  | 117.29 | 77.13  | 118.18 | 184.87 | 133.55 | 2.85   | 96.95  | 67.98  | 89.76  | 95.84  |
| chr8 | 102585897 | 102586052 | GRHL2   | 45.30  | 59.20  | 43.81  | 43.69  | 56.08  | 37.65  | 55.06  | 66.31  | 75.69  | 74.21  | 51.02  | 30.31  | 50.34  | 53.19  |
| chr8 | 102589637 | 102589747 | GRHL2   | 26.54  | 53.87  | 42.22  | 33.86  | 73.41  | 39.98  | 47.20  | 80.66  | 65.03  | 45.72  | 51.28  | 29.50  | 51.92  | 49.11  |
| chr8 | 102611286 | 102611379 | GRHL2   | 86.67  | 128.18 | 109.82 | 79.78  | 126.24 | 87.48  | 145.60 | 223.37 | 173.61 | 7.73   | 96.97  | 112.80 | 110.50 | 114.85 |
| chr8 | 102631768 | 102631925 | GRHL2   | 85.75  | 164.63 | 101.84 | 85.53  | 128.38 | 84.04  | 176.99 | 233.89 | 186.11 | 4.22   | 131.07 | 95.27  | 113.53 | 123.14 |
| chr8 | 102643866 | 102643952 | GRHL2   | 65.43  | 73.66  | 47.86  | 56.31  | 90.03  | 32.06  | 56.47  | 104.11 | 90.91  | 76.67  | 71.00  | 49.54  | 74.62  | 67.84  |
| chr8 | 102644455 | 102644593 | GRHL2   | 57.05  | 83.35  | 51.91  | 47.59  | 83.19  | 65.68  | 98.54  | 157.91 | 104.24 | 33.35  | 76.75  | 61.40  | 68.63  | 76.75  |
| chr8 | 102649126 | 102649156 | GRHL2   | 100.45 | 157.55 | 90.65  | 107.00 | 148.68 | 95.10  | 161.19 | 244.39 | 173.10 | 39.45  | 109.52 | 89.32  | 98.74  | 126.37 |
| chr8 | 102656360 | 102656453 | GRHL2   | 71.95  | 82.93  | 44.63  | 57.39  | 85.17  | 47.93  | 84.89  | 151.54 | 98.53  | 90.84  | 58.05  | 45.23  | 74.89  | 76.59  |
| chr8 | 102661643 | 102661727 | GRHL2   | 33.99  | 43.33  | 40.76  | 41.53  | 55.39  | 36.49  | 31.93  | 88.21  | 59.91  | 45.98  | 39.62  | 28.27  | 39.22  | 45.45  |
| chr8 | 102676683 | 102676746 | GRHL2   | 40.55  | 39.09  | 29.03  | 43.88  | 67.38  | 27.05  | 51.75  | 68.08  | 62.06  | 19.94  | 53.66  | 29.69  | 43.47  | 44.35  |
| chr8 | 102678818 | 102678931 | GRHL2   | 47.43  | 46.80  | 24.55  | 47.33  | 60.30  | 37.53  | 46.30  | 65.84  | 54.92  | 96.81  | 54.08  | 34.94  | 47.47  | 51.40  |
| chr9 | 75192819  | 75192939  | TMC1    | 0.58   | 0.00   | 0.02   | 0.00   | 0.00   | 0.14   | 0.00   | 0.80   | 0.79   | 0.00   | 1.31   | 0.43   | 1.42   | 0.34   |
| chr9 | 75231285  | 75231393  | TMC1    | 0.00   | 0.00   | 0.00   | 0.00   | 0.02   | 0.00   | 0.92   | 0.00   | 0.53   | 0.00   | 0.00   | 0.00   | 0.00   | 0.12   |
| chr9 | 75242838  | 75242979  | TMC1    | 19.98  | 33.85  | 24.10  | 33.95  | 30.05  | 26.65  | 35.29  | 40.07  | 27.87  | 34.79  | 29.45  | 12.07  | 25.15  | 29.01  |
| chr9 | 75263514  | 75263580  | TMC1    | 33.45  | 55.21  | 31.85  | 38.73  | 45.22  | 32.79  | 46.13  | 63.24  | 58.88  | 36.24  | 44.51  | 28.46  | 40.22  | 42.89  |
| chr9 | 75303626  | 75303672  | TMC1    | 51.74  | 86.57  | 60.04  | 51.28  | 98.43  | 42.96  | 81.96  | 87.26  | 105.11 | 7.47   | 83.74  | 66.64  | 67.91  | 68.60  |
| chr9 | 75309460  | 75309630  | TMC1    | 26.98  | 34.64  | 28.29  | 24.96  | 33.74  | 25.87  | 42.84  | 40.39  | 30.60  | 2.62   | 43.70  | 18.20  | 28.81  | 29.40  |
| chr9 | 75315435  | 75315559  | TMC1    | 23.59  | 30.03  | 18.49  | 29.50  | 24.02  | 27.46  | 33.74  | 53.30  | 35.03  | 0.00   | 26.42  | 20.75  | 14.66  | 26.86  |
| chr9 | 75355036  | 75355125  | TMC1    | 75.44  | 119.59 | 67.77  | 69.53  | 97.83  | 52.72  | 101.32 | 143.80 | 136.29 | 24.71  | 98.27  | 57.58  | 70.83  | 87.07  |
| chr9 | 75357361  | 75357441  | TMC1    | 51.01  | 78.49  | 50.25  | 42.11  | 60.22  | 37.09  | 82.33  | 137.06 | 79.20  | 27.78  | 64.85  | 41.99  | 38.80  | 62.70  |
| chr9 | 75366767  | 75366872  | TMC1    | 19.54  | 49.66  | 18.14  | 22.95  | 32.65  | 22.09  | 60.28  | 56.07  | 39.75  | 0.60   | 30.84  | 28.07  | 19.31  | 31.72  |
| chr9 | 75369703  | 75369800  | TMC1    | 65.80  | 116.42 | 69.16  | 73.66  | 93.01  | 65.44  | 112.63 | 166.22 | 132.81 | 109.38 | 93.11  | 70.03  | 80.83  | 97.31  |
|      |           |           |         |        |        |        |        |        |        |        |        |        |        |        |        |        |        |

|       |           |           |        |        |        |        |        |        |        |        |        |        |        |        |        |        |        |
|-------|-----------|-----------|--------|--------|--------|--------|--------|--------|--------|--------|--------|--------|--------|--------|--------|--------|--------|
| chr9  | 117168636 | 117169172 | WHRN   | 48.42  | 51.81  | 34.14  | 54.70  | 81.35  | 37.56  | 52.24  | 78.76  | 56.50  | 126.26 | 50.27  | 36.77  | 53.93  | 59.07  |
| chr9  | 117170228 | 117170298 | WHRN   | 41.49  | 23.83  | 23.59  | 48.68  | 59.79  | 29.25  | 44.01  | 50.55  | 45.82  | 73.69  | 45.97  | 28.68  | 42.28  | 42.95  |
| chr9  | 117185595 | 117185803 | WHRN   | 34.64  | 49.19  | 38.10  | 49.31  | 77.60  | 46.41  | 54.45  | 95.39  | 54.65  | 102.72 | 55.88  | 34.35  | 51.20  | 57.72  |
| chr9  | 117186615 | 117186626 | WHRN   | 12.35  | 26.00  | 17.92  | 23.97  | 31.70  | 18.55  | 15.97  | 27.46  | 30.25  | 52.99  | 16.21  | 13.63  | 24.36  | 23.92  |
| chr9  | 117187269 | 117187304 | WHRN   | 45.17  | 76.72  | 47.72  | 58.69  | 84.75  | 54.17  | 73.94  | 103.50 | 68.25  | 83.39  | 66.78  | 34.28  | 55.78  | 66.45  |
| chr9  | 117188492 | 117188693 | WHRN   | 21.12  | 25.19  | 22.90  | 20.63  | 31.17  | 21.17  | 20.71  | 42.52  | 37.93  | 48.56  | 24.87  | 21.36  | 34.81  | 28.18  |
| chr9  | 117228548 | 117228672 | WHRN   | 96.90  | 106.83 | 71.84  | 89.37  | 155.50 | 62.91  | 102.30 | 121.42 | 139.87 | 228.25 | 106.46 | 62.60  | 97.31  | 112.02 |
| chr9  | 117240834 | 117241051 | WHRN   | 63.28  | 88.17  | 66.43  | 88.63  | 140.24 | 64.87  | 111.01 | 131.28 | 109.07 | 188.17 | 85.87  | 56.39  | 89.78  | 99.45  |
| chr9  | 117266465 | 117267081 | WHRN   | 66.95  | 80.37  | 57.86  | 78.51  | 146.96 | 65.19  | 82.39  | 104.21 | 99.99  | 181.61 | 73.84  | 59.06  | 87.89  | 91.41  |
| chr9  | 140086565 | 140086626 | TPRN   | 66.97  | 73.94  | 60.26  | 84.85  | 123.82 | 75.47  | 76.55  | 91.11  | 82.13  | 180.66 | 81.82  | 44.02  | 107.42 | 86.80  |
| chr9  | 140086712 | 140086817 | TPRN   | 61.36  | 56.68  | 50.19  | 64.16  | 110.63 | 55.22  | 67.74  | 85.78  | 60.07  | 128.95 | 64.77  | 51.33  | 86.42  | 71.41  |
| chr9  | 140086904 | 140087143 | TPRN   | 77.04  | 80.26  | 64.02  | 93.70  | 127.57 | 53.19  | 95.96  | 121.40 | 97.99  | 201.81 | 78.00  | 71.30  | 109.26 | 96.85  |
| chr9  | 140093440 | 140095163 | TPRN   | 39.42  | 60.32  | 37.70  | 43.76  | 72.27  | 42.26  | 54.67  | 76.42  | 57.07  | 102.74 | 44.41  | 37.65  | 51.55  | 55.73  |
| chr10 | 26224674  | 26224759  | MYO3A  | 0.00   | 0.00   | 0.90   | 0.00   | 0.00   | 1.95   | 0.42   | 0.95   | 0.00   | 0.66   | 0.00   | 0.00   | 0.00   | 0.41   |
| chr10 | 26241024  | 26241207  | MYO3A  | 28.93  | 76.76  | 30.94  | 27.77  | 41.31  | 28.99  | 60.41  | 89.45  | 60.51  | 4.38   | 37.55  | 30.80  | 33.23  | 43.15  |
| chr10 | 26243804  | 26243937  | MYO3A  | 20.23  | 55.62  | 42.70  | 29.67  | 45.89  | 35.21  | 54.88  | 100.31 | 57.79  | 0.11   | 23.86  | 26.59  | 33.03  | 41.07  |
| chr10 | 26285420  | 26285523  | MYO3A  | 44.18  | 58.53  | 36.27  | 30.42  | 43.79  | 36.01  | 40.38  | 87.65  | 51.42  | 0.43   | 45.67  | 23.05  | 27.64  | 41.48  |
| chr10 | 26286089  | 26286187  | MYO3A  | 29.73  | 59.44  | 32.36  | 33.67  | 45.46  | 26.70  | 58.83  | 92.79  | 64.31  | 0.00   | 23.22  | 31.83  | 24.78  | 41.53  |
| chr10 | 26305750  | 26305825  | MYO3A  | 54.96  | 95.79  | 68.07  | 68.25  | 103.13 | 54.87  | 102.45 | 146.80 | 109.91 | 62.01  | 80.97  | 59.63  | 75.82  | 83.90  |
| chr10 | 26310433  | 26310577  | MYO3A  | 77.36  | 99.85  | 58.99  | 64.39  | 102.50 | 62.14  | 119.69 | 163.48 | 140.63 | 64.73  | 102.66 | 57.44  | 86.48  | 92.82  |
| chr10 | 26312952  | 26313016  | MYO3A  | 129.31 | 226.28 | 133.00 | 123.55 | 169.75 | 133.38 | 220.58 | 301.48 | 233.68 | 10.06  | 190.11 | 126.68 | 157.80 | 166.49 |
| chr10 | 26315307  | 26315461  | MYO3A  | 54.50  | 80.97  | 55.25  | 41.16  | 70.32  | 52.87  | 94.24  | 99.87  | 102.90 | 12.59  | 56.28  | 46.79  | 59.90  | 63.98  |
| chr10 | 26355905  | 26356003  | MYO3A  | 69.43  | 94.16  | 57.91  | 68.49  | 90.85  | 60.35  | 93.54  | 134.21 | 140.55 | 2.00   | 44.01  | 72.03  | 58.98  | 77.29  |
| chr10 | 26357698  | 26357813  | MYO3A  | 84.87  | 155.69 | 96.15  | 75.63  | 114.73 | 76.28  | 158.48 | 186.31 | 169.23 | 1.00   | 97.58  | 75.59  | 74.93  | 107.63 |
| chr10 | 26359041  | 26359144  | MYO3A  | 18.02  | 50.60  | 18.46  | 21.45  | 24.48  | 28.49  | 41.35  | 53.75  | 51.51  | 2.00   | 27.21  | 22.08  | 28.97  | 29.95  |
| chr10 | 26359248  | 26359330  | MYO3A  | 22.66  | 53.07  | 34.88  | 29.17  | 30.18  | 42.10  | 46.66  | 58.99  | 58.14  | 2.11   | 37.42  | 35.45  | 26.82  | 37.57  |
| chr10 | 26377133  | 26377334  | MYO3A  | 28.48  | 55.17  | 44.79  | 28.68  | 51.79  | 38.42  | 50.48  | 61.66  | 66.04  | 1.60   | 34.32  | 33.54  | 31.48  | 41.25  |
| chr10 | 26385311  | 26385408  | MYO3A  | 28.36  | 40.36  | 34.21  | 21.31  | 34.13  | 27.23  | 42.84  | 42.13  | 57.02  | 1.81   | 30.26  | 32.12  | 26.71  | 32.65  |
| chr10 | 26385498  | 26385611  | MYO3A  | 30.39  | 48.33  | 29.93  | 21.69  | 38.54  | 32.82  | 65.17  | 64.19  | 74.24  | 0.26   | 35.61  | 36.60  | 28.77  | 39.82  |
| chr10 | 26409606  | 26409731  | MYO3A  | 43.58  | 67.53  | 48.48  | 39.90  | 83.68  | 49.70  | 96.07  | 123.16 | 93.92  | 20.75  | 61.04  | 52.93  | 51.50  | 65.06  |
| chr10 | 26414328  | 26414537  | MYO3A  | 29.78  | 54.91  | 31.46  | 48.49  | 53.49  | 35.11  | 54.17  | 73.89  | 59.81  | 24.48  | 50.74  | 37.57  | 34.30  | 46.16  |
| chr10 | 26417321  | 26417467  | MYO3A  | 16.00  | 34.73  | 21.84  | 23.29  | 28.42  | 19.56  | 31.88  | 48.99  | 39.79  | 1.78   | 18.86  | 22.99  | 19.21  | 25.68  |
| chr10 | 26432378  | 26432530  | MYO3A  | 82.03  | 130.96 | 91.75  | 71.08  | 114.04 | 74.61  | 141.42 | 182.47 | 145.42 | 8.02   | 77.95  | 85.33  | 91.95  | 100.42 |
| chr10 | 26434376  | 26434463  | MYO3A  | 30.09  | 63.45  | 39.70  | 31.99  | 48.13  | 40.82  | 74.26  | 93.55  | 78.53  | 2.80   | 39.24  | 38.18  | 34.02  | 48.39  |
| chr10 | 26436360  | 26436488  | MYO3A  | 135.68 | 204.86 | 129.13 | 119.40 | 195.29 | 115.09 | 237.67 | 377.53 | 248.36 | 21.72  | 136.71 | 124.74 | 149.18 | 170.52 |
| chr10 | 26442780  | 26442858  | MYO3A  | 32.10  | 56.08  | 38.73  | 19.73  | 29.85  | 33.99  | 49.00  | 70.30  | 65.67  | 1.25   | 34.41  | 43.05  | 19.66  | 39.51  |
| chr10 | 26443676  | 26443752  | MYO3A  | 62.03  | 74.64  | 42.23  | 55.94  | 86.26  | 46.18  | 75.51  | 92.97  | 87.62  | 8.17   | 63.69  | 39.45  | 57.78  | 61.22  |
| chr10 | 26446240  | 26446444  | MYO3A  | 94.49  | 150.73 | 112.31 | 92.27  | 128.08 | 82.73  | 164.76 | 199.90 | 163.54 | 57.23  | 135.74 | 84.35  | 103.55 | 122.18 |
| chr10 | 26454997  | 26455107  | MYO3A  | 25.80  | 23.25  | 18.35  | 27.11  | 33.03  | 18.18  | 31.16  | 37.77  | 34.14  | 26.30  | 23.17  | 15.20  | 20.95  | 26.12  |
| chr10 | 26457642  | 26457803  | MYO3A  | 9.77   | 32.40  | 17.67  | 12.12  | 18.09  | 10.30  | 32.20  | 31.59  | 33.42  | 2.03   | 20.54  | 16.41  | 13.46  | 19.71  |
| chr10 | 26459346  | 26459468  | MYO3A  | 20.07  | 36.33  | 25.47  | 15.02  | 18.74  | 15.93  | 25.11  | 50.93  | 42.38  | 1.38   | 18.30  | 14.24  | 19.53  | 23.66  |
| chr10 | 26462593  | 26463486  | MYO3A  | 76.67  | 113.44 | 82.52  | 82.94  | 110.63 | 58.66  | 109.48 | 144.57 | 130.78 | 34.05  | 92.61  | 73.00  | 91.52  | 92.45  |
| chr10 | 26465631  | 26465774  | MYO3A  | 76.27  | 133.95 | 89.38  | 83.94  | 122.19 | 95.57  | 159.81 | 229.86 | 160.92 | 12.19  | 111.42 | 87.28  | 88.76  | 113.57 |
| chr10 | 26482135  | 26482240  | MYO3A  | 24.92  | 64.57  | 41.24  | 36.61  | 36.92  | 32.08  | 43.79  | 65.00  | 67.07  | 16.33  | 39.83  | 47.92  | 40.18  | 43.02  |
| chr10 | 26490195  | 26490234  | MYO3A  | 15.55  | 36.88  | 30.15  | 17.18  | 16.48  | 16.33  | 22.13  | 28.68  | 26.83  | 4.05   | 25.45  | 15.10  | 14.88  | 21.23  |
| chr10 | 26491894  | 26492036  | MYO3A  | 62.25  | 128.82 | 84.24  | 67.06  | 104.48 | 77.03  | 101.98 | 129.91 | 131.55 | 0.85   | 89.44  | 67.62  | 82.43  | 87.10  |
| chr10 | 26500773  | 26500892  | MYO3A  | 45.12  | 74.44  | 49.54  | 58.20  | 95.17  | 41.64  | 49.86  | 76.12  | 61.07  | 121.36 | 57.34  | 41.82  | 61.47  | 64.31  |
| chr10 | 55566340  | 55566890  | PCDH15 | 68.60  | 113.25 | 82.89  | 59.81  | 110.81 | 76.69  | 117.26 | 167.98 | 146.18 | 68.57  | 96.25  | 78.09  | 84.53  | 98.87  |
| chr10 | 55568453  | 55569306  | PCDH15 | 76.80  | 124.42 | 88.61  | 80.94  | 113.86 | 83.92  | 155.63 | 212.92 | 162.24 | 46.33  | 104.46 | 92.66  | 92.06  | 111.90 |
| chr10 | 55570317  | 55570426  | PCDH15 | 79.86  | 114.26 | 78.55  | 90.70  | 102.51 | 77.45  | 110.13 | 137.93 | 144.72 | 23.15  | 109.40 | 85.50  | 91.75  | 96.18  |
| chr10 | 55571310  | 55571381  | PCDH15 | 18.97  | 39.67  | 30.50  | 17.00  | 26.15  | 20.60  | 31.22  | 39.15  | 30.65  | 0.00   | 18.71  | 21.47  | 16.13  | 24.51  |
| chr10 | 55581619  | 55583118  | PCDH15 | 70.22  | 114.92 | 71.86  | 66.48  | 88.04  | 62.95  | 121.81 | 175.03 | 132.51 | 33.44  | 83.87  | 63.82  | 72.14  | 90.41  |
| chr10 | 55583190  | 55583193  | PCDH15 | 14.00  | 30.25  | 30.00  | 22.50  | 26.25  | 20.50  | 31.00  | 41.75  | 28.00  | 1.00   | 12.00  | 17.25  | 14.25  | 22.88  |
| chr10 | 55587150  | 55587308  | PCDH15 | 44.57  | 111.58 | 62.33  | 56.05  | 94.06  | 69.82  | 99.58  | 130.60 | 116.74 | 96.71  | 60.98  | 69.21  | 63.38  | 84.35  |
| chr10 | 55588326  | 55588333  | PCDH15 | 25.13  | 55.38  | 39.13  | 16.38  | 32.50  | 35.88  | 68.88  | 72.50  | 57.25  | 0.00   | 44.88  | 53.13  | 27.00  | 41.05  |
| chr10 | 55591076  | 55591293  | PCDH15 | 40.58  | 40.27  | 61.16  | 49.98  | 45.83  | 23.11  | 75.49  | 96.19  | 58.42  | 54.49  | 40.27  | 38.44  | 41.32  | 52.02  |
| chr10 | 55600081  | 55600256  | PCDH15 | 70.45  | 118.76 | 84.97  | 86.97  | 110.61 | 68.12  | 132.60 | 181.92 | 146.05 | 59.38  | 88.84  | 68.10  | 94.34  | 101.40 |
| chr10 | 55616936  | 55617023  | PCDH15 | 28.36  | 71.26  | 47.30  | 34.82  | 37.42  | 35.76  | 65.85  | 72.75  | 87.63  | 3.16   | 44.51  | 35.93  | 39.41  | 47.06  |
| chr10 | 55626403  | 55626617  | PCDH15 | 62.92  | 111.67 | 78.37  | 63.78  | 92.01  | 58.23  | 123.16 | 152.93 | 146.23 | 1.22   | 69.64  | 72.19  | 64.54  | 86.03  |
| chr10 | 55663004  | 55663130  | PCDH15 | 10.97  | 40.58  | 27.24  | 20.40  | 23.06  | 28.80  | 47.73  | 73.82  | 50.63  | 7.69   | 25.11  | 35.86  | 33.90  | 32.66  |
| chr10 | 55698576  | 55698715  | PCDH15 | 62.64  | 113.06 | 67.33  | 54.95  | 99.98  | 53.79  | 94.90  | 134.91 | 129.82 | 1.00   | 71.01  | 68.22  | 80.87  | 79.30  |
| chr10 | 55700627  | 55700735  | PCDH15 | 97.22  | 139.74 | 101.10 | 84.06  | 95.87  | 96.61  | 146.37 | 165.29 | 160.50 | 9.87   | 100.66 | 86.57  | 79.49  | 106.99 |
| chr10 | 55719493  | 55719604  | PCDH15 | 81.99  | 124.65 | 100.58 | 89.07  | 115.63 | 89.41  | 158.21 | 179.30 | 166.04 | 41.89  | 122.88 | 106.22 | 93.39  | 114.66 |
| chr10 | 55721513  | 55721652  | PCDH15 | 48.22  | 109.90 | 84.85  | 35.41  | 59.94  | 61.88  | 110.95 | 139.86 | 124.79 | 0.00   | 81.24  | 78.86  | 72.29  | 77.99  |
| chr10 | 55755410  | 55755525  | PCDH15 | 71.40  | 143.13 | 98.61  | 93.58  | 109.34 | 72.87  | 122.71 | 245.39 | 159.25 | 4.97   | 103.10 | 78.99  | 78.33  | 108.61 |
|       |           |           |        |        |        |        |        |        |        |        |        |        |        |        |        |        |        |

|       |          |          |        |        |        |        |        |        |        |        |        |        |        |        |       |        |        |
|-------|----------|----------|--------|--------|--------|--------|--------|--------|--------|--------|--------|--------|--------|--------|-------|--------|--------|
| chr10 | 56106126 | 56106244 | PCDH15 | 64.74  | 140.81 | 89.88  | 65.13  | 84.07  | 84.04  | 148.67 | 160.50 | 140.88 | 3.45   | 72.60  | 77.65 | 65.29  | 94.37  |
| chr10 | 56128881 | 56129035 | PCDH15 | 49.01  | 81.41  | 62.15  | 56.38  | 78.70  | 58.68  | 96.06  | 101.90 | 111.37 | 16.42  | 58.55  | 44.76 | 63.16  | 67.95  |
| chr10 | 56138543 | 56138702 | PCDH15 | 45.67  | 74.59  | 41.68  | 34.74  | 73.54  | 45.16  | 55.07  | 91.70  | 89.01  | 17.22  | 61.72  | 52.73 | 47.51  | 56.90  |
| chr10 | 56287573 | 56287637 | PCDH15 | 46.55  | 82.43  | 49.28  | 43.80  | 67.86  | 37.86  | 76.74  | 81.72  | 100.78 | 0.00   | 43.52  | 35.43 | 35.98  | 55.50  |
| chr10 | 56288149 | 56288162 | PCDH15 | 39.43  | 75.57  | 40.50  | 34.71  | 37.64  | 33.71  | 64.71  | 77.21  | 90.50  | 1.00   | 42.36  | 41.79 | 39.86  | 48.26  |
| chr10 | 56423933 | 56424050 | PCDH15 | 80.38  | 122.19 | 77.74  | 89.16  | 114.61 | 53.67  | 121.36 | 171.15 | 141.32 | 4.63   | 85.94  | 73.47 | 75.69  | 94.64  |
| chr10 | 73199585 | 73199655 | CDH23  | 30.04  | 45.87  | 31.73  | 34.45  | 55.31  | 47.59  | 51.86  | 74.94  | 53.99  | 105.38 | 33.04  | 24.49 | 46.97  | 49.06  |
| chr10 | 73206076 | 73206152 | CDH23  | 32.34  | 40.62  | 31.47  | 37.99  | 58.00  | 26.62  | 48.38  | 71.49  | 47.40  | 73.69  | 51.48  | 38.09 | 35.32  | 46.46  |
| chr10 | 73269840 | 73269981 | CDH23  | 57.37  | 94.72  | 60.79  | 82.08  | 120.52 | 63.28  | 94.25  | 140.12 | 102.51 | 193.27 | 80.82  | 58.13 | 83.76  | 95.65  |
| chr10 | 73270712 | 73270758 | CDH23  | 59.74  | 72.66  | 49.83  | 54.04  | 100.55 | 51.66  | 67.94  | 99.64  | 91.53  | 161.77 | 64.04  | 49.60 | 85.62  | 76.92  |
| chr10 | 73270878 | 73270969 | CDH23  | 96.05  | 106.59 | 81.25  | 106.38 | 168.93 | 75.89  | 121.32 | 166.12 | 128.76 | 296.60 | 110.23 | 71.65 | 116.76 | 127.48 |
| chr10 | 73326500 | 73326693 | CDH23  | 59.66  | 85.62  | 55.64  | 77.19  | 93.63  | 65.45  | 83.95  | 121.48 | 102.52 | 162.21 | 83.21  | 55.44 | 66.42  | 87.17  |
| chr10 | 73330548 | 73330675 | CDH23  | 47.76  | 86.30  | 48.24  | 50.40  | 87.96  | 73.06  | 79.20  | 125.18 | 102.77 | 77.25  | 58.59  | 48.20 | 70.92  | 73.74  |
| chr10 | 73337672 | 73337749 | CDH23  | 73.56  | 95.42  | 62.14  | 78.55  | 97.31  | 74.19  | 77.44  | 101.78 | 86.50  | 157.13 | 91.26  | 45.41 | 56.26  | 86.72  |
| chr10 | 73375262 | 73375373 | CDH23  | 85.30  | 94.54  | 66.54  | 89.03  | 144.71 | 69.17  | 90.00  | 137.65 | 88.89  | 197.70 | 101.19 | 66.68 | 108.58 | 102.62 |
| chr10 | 73376963 | 73377237 | CDH23  | 39.03  | 48.54  | 36.01  | 42.03  | 54.41  | 35.41  | 53.70  | 78.04  | 55.17  | 85.13  | 55.48  | 32.25 | 50.63  | 51.27  |
| chr10 | 73405583 | 73405737 | CDH23  | 55.75  | 67.86  | 47.76  | 65.62  | 93.62  | 54.33  | 58.59  | 86.47  | 73.90  | 141.12 | 60.49  | 46.07 | 59.45  | 70.97  |
| chr10 | 73406217 | 73406518 | CDH23  | 30.04  | 47.07  | 26.39  | 38.78  | 46.40  | 33.43  | 41.27  | 43.80  | 46.75  | 82.70  | 37.80  | 34.55 | 42.53  | 43.09  |
| chr10 | 73434870 | 73434933 | CDH23  | 38.28  | 32.56  | 23.73  | 35.25  | 40.84  | 30.50  | 40.14  | 79.75  | 48.64  | 68.61  | 55.22  | 23.55 | 38.77  | 43.09  |
| chr10 | 73437214 | 73437450 | CDH23  | 81.96  | 88.76  | 66.17  | 76.73  | 148.64 | 61.47  | 95.76  | 156.73 | 123.86 | 227.59 | 84.44  | 66.43 | 93.03  | 106.55 |
| chr10 | 73439145 | 73439249 | CDH23  | 108.33 | 97.79  | 83.67  | 91.41  | 159.64 | 101.52 | 109.90 | 195.78 | 117.66 | 236.10 | 121.74 | 78.31 | 147.68 | 125.15 |
| chr10 | 73442203 | 73442329 | CDH23  | 52.19  | 49.32  | 27.54  | 40.72  | 58.06  | 42.05  | 48.71  | 70.27  | 57.39  | 88.19  | 54.56  | 35.72 | 52.11  | 52.06  |
| chr10 | 73447405 | 73447476 | CDH23  | 53.58  | 50.75  | 59.22  | 85.24  | 126.85 | 38.29  | 72.65  | 80.81  | 73.36  | 160.08 | 69.42  | 47.17 | 73.50  | 76.45  |
| chr10 | 73450226 | 73450341 | CDH23  | 30.96  | 31.15  | 22.42  | 27.45  | 41.35  | 29.41  | 26.22  | 34.00  | 29.84  | 55.76  | 26.53  | 15.46 | 30.59  | 30.88  |
| chr10 | 73453905 | 73454016 | CDH23  | 45.08  | 38.32  | 19.94  | 42.87  | 78.36  | 20.49  | 40.04  | 52.65  | 41.88  | 106.79 | 46.02  | 23.26 | 45.16  | 46.31  |
| chr10 | 73455176 | 73455282 | CDH23  | 116.99 | 133.15 | 104.27 | 141.63 | 209.66 | 107.69 | 139.77 | 191.22 | 159.79 | 327.47 | 146.34 | 96.71 | 156.92 | 156.22 |
| chr10 | 73461780 | 73461968 | CDH23  | 74.65  | 92.36  | 55.18  | 100.85 | 143.69 | 77.24  | 107.61 | 126.97 | 101.55 | 203.90 | 99.93  | 76.09 | 96.53  | 105.00 |
| chr10 | 73462307 | 73462451 | CDH23  | 70.74  | 114.03 | 70.93  | 105.92 | 110.74 | 84.28  | 123.94 | 163.95 | 111.46 | 233.23 | 105.14 | 80.23 | 102.14 | 114.55 |
| chr10 | 73464669 | 73464887 | CDH23  | 55.86  | 62.60  | 40.79  | 65.59  | 97.44  | 42.58  | 63.58  | 86.98  | 84.44  | 125.76 | 43.90  | 39.59 | 52.91  | 67.43  |
| chr10 | 73466655 | 73466886 | CDH23  | 52.07  | 60.19  | 42.71  | 68.76  | 107.40 | 50.02  | 53.21  | 86.83  | 62.06  | 144.88 | 74.40  | 36.51 | 79.81  | 69.92  |
| chr10 | 73468856 | 73468968 | CDH23  | 33.68  | 35.38  | 31.99  | 39.74  | 72.58  | 27.96  | 39.81  | 52.04  | 55.55  | 83.35  | 44.63  | 25.39 | 42.02  | 45.17  |
| chr10 | 73472423 | 73472570 | CDH23  | 89.31  | 109.22 | 72.32  | 118.69 | 161.75 | 76.20  | 125.14 | 146.08 | 124.08 | 222.07 | 101.20 | 74.28 | 108.85 | 118.36 |
| chr10 | 73483803 | 73483862 | CDH23  | 63.50  | 101.17 | 69.62  | 87.77  | 127.13 | 61.30  | 102.43 | 117.65 | 88.50  | 188.20 | 84.73  | 37.75 | 77.40  | 94.15  |
| chr10 | 73485130 | 73485277 | CDH23  | 52.49  | 68.59  | 60.24  | 60.88  | 93.44  | 55.84  | 93.95  | 115.57 | 94.28  | 141.55 | 63.74  | 61.41 | 62.81  | 80.16  |
| chr10 | 73490227 | 73490361 | CDH23  | 24.62  | 26.23  | 18.53  | 43.72  | 47.39  | 16.07  | 27.62  | 39.48  | 28.87  | 63.69  | 37.45  | 10.97 | 39.42  | 32.05  |
| chr10 | 73491745 | 73492174 | CDH23  | 110.46 | 120.51 | 91.17  | 127.85 | 188.73 | 99.75  | 135.01 | 210.88 | 151.83 | 269.03 | 115.92 | 95.41 | 123.06 | 143.05 |
| chr10 | 73493998 | 73494098 | CDH23  | 38.04  | 42.51  | 40.53  | 60.69  | 73.97  | 45.12  | 54.39  | 83.02  | 73.16  | 120.77 | 57.46  | 42.17 | 58.16  | 60.99  |
| chr10 | 73498253 | 73498404 | CDH23  | 54.28  | 74.65  | 47.69  | 63.72  | 79.93  | 64.01  | 83.19  | 112.07 | 81.65  | 137.57 | 68.32  | 52.58 | 63.79  | 76.64  |
| chr10 | 73499402 | 73499529 | CDH23  | 45.84  | 32.99  | 22.77  | 42.90  | 72.69  | 20.34  | 31.09  | 51.55  | 42.30  | 91.06  | 43.63  | 27.41 | 46.59  | 43.70  |
| chr10 | 73500580 | 73500707 | CDH23  | 95.61  | 124.80 | 90.43  | 145.55 | 183.55 | 111.59 | 132.16 | 175.21 | 143.74 | 284.27 | 124.43 | 97.34 | 132.90 | 142.39 |
| chr10 | 73501452 | 73501678 | CDH23  | 64.63  | 66.39  | 67.24  | 82.20  | 127.82 | 66.58  | 84.47  | 133.08 | 100.38 | 176.80 | 76.88  | 70.32 | 85.30  | 93.07  |
| chr10 | 73537438 | 73537658 | CDH23  | 39.37  | 53.57  | 42.84  | 54.43  | 73.80  | 41.06  | 63.90  | 86.25  | 55.95  | 121.74 | 49.81  | 34.73 | 45.98  | 59.79  |
| chr10 | 73537947 | 73538065 | CDH23  | 51.29  | 48.66  | 38.66  | 52.95  | 71.72  | 33.75  | 37.64  | 72.34  | 50.58  | 103.24 | 46.22  | 27.37 | 59.41  | 52.87  |
| chr10 | 73539025 | 73539204 | CDH23  | 73.76  | 107.48 | 73.52  | 75.02  | 117.11 | 78.86  | 115.42 | 157.12 | 143.63 | 158.28 | 82.31  | 68.86 | 76.27  | 104.28 |
| chr10 | 73544045 | 73544177 | CDH23  | 49.74  | 77.05  | 46.77  | 80.29  | 91.46  | 49.20  | 81.96  | 97.89  | 68.67  | 138.30 | 76.11  | 43.98 | 57.98  | 75.12  |
| chr10 | 73544649 | 73544857 | CDH23  | 58.48  | 77.47  | 49.71  | 62.54  | 90.26  | 69.08  | 78.38  | 122.15 | 83.49  | 143.32 | 68.33  | 49.78 | 55.58  | 79.42  |
| chr10 | 73545389 | 73545495 | CDH23  | 79.06  | 102.27 | 76.67  | 97.48  | 131.15 | 66.46  | 88.33  | 131.84 | 101.63 | 185.87 | 86.23  | 78.11 | 96.03  | 102.09 |
| chr10 | 73548698 | 73548799 | CDH23  | 93.79  | 114.24 | 82.50  | 92.14  | 164.03 | 74.16  | 121.69 | 176.53 | 166.05 | 223.70 | 110.83 | 70.14 | 106.49 | 124.15 |
| chr10 | 73550046 | 73550170 | CDH23  | 89.22  | 102.87 | 66.09  | 91.26  | 160.71 | 77.32  | 112.84 | 167.85 | 122.48 | 236.09 | 102.40 | 68.65 | 109.94 | 116.48 |
| chr10 | 73550890 | 73551092 | CDH23  | 40.71  | 42.66  | 39.39  | 53.20  | 79.80  | 35.38  | 40.87  | 57.65  | 40.01  | 107.01 | 53.31  | 27.23 | 60.85  | 51.44  |
| chr10 | 73552940 | 73553397 | CDH23  | 97.28  | 124.41 | 92.94  | 109.48 | 162.68 | 102.18 | 129.41 | 181.06 | 152.56 | 225.83 | 126.37 | 86.66 | 128.87 | 132.57 |
| chr10 | 73556862 | 73556977 | CDH23  | 30.71  | 39.78  | 28.59  | 44.37  | 40.48  | 19.42  | 39.42  | 65.63  | 33.72  | 65.82  | 34.40  | 18.12 | 33.78  | 38.37  |
| chr10 | 73558112 | 73558335 | CDH23  | 20.89  | 26.03  | 62.05  | 33.04  | 27.19  | 77.60  | 40.23  | 48.96  | 41.61  | 29.59  | 26.34  | 26.29 | 26.34  | 38.32  |
| chr10 | 73558869 | 73559037 | CDH23  | 86.20  | 124.05 | 72.13  | 107.50 | 141.27 | 84.07  | 125.92 | 181.83 | 121.01 | 187.82 | 95.98  | 82.88 | 89.60  | 117.56 |
| chr10 | 73559250 | 73559386 | CDH23  | 35.55  | 42.21  | 31.63  | 35.66  | 50.82  | 25.19  | 40.19  | 66.99  | 51.63  | 82.10  | 50.24  | 28.70 | 46.45  | 45.08  |
| chr10 | 73560394 | 73560512 | CDH23  | 37.69  | 55.73  | 31.03  | 30.97  | 55.63  | 32.87  | 64.14  | 65.52  | 59.70  | 64.46  | 40.13  | 30.81 | 33.37  | 47.39  |
| chr10 | 73562656 | 73562832 | CDH23  | 112.91 | 109.94 | 78.33  | 146.92 | 190.28 | 104.93 | 129.56 | 194.94 | 135.60 | 323.24 | 128.29 | 98.66 | 153.66 | 146.13 |
| chr10 | 73562967 | 73563177 | CDH23  | 47.85  | 74.91  | 46.82  | 60.36  | 90.60  | 52.19  | 56.42  | 117.77 | 79.68  | 149.69 | 59.70  | 49.51 | 64.63  | 73.79  |
| chr10 | 73565564 | 73565754 | CDH23  | 59.16  | 83.53  | 53.55  | 81.40  | 113.88 | 62.96  | 73.72  | 134.48 | 80.03  | 158.58 | 73.50  | 49.59 | 73.94  | 85.37  |
| chr10 | 73565926 | 73566038 | CDH23  | 40.20  | 47.97  | 41.42  | 36.48  | 76.57  | 35.21  | 58.89  | 81.60  | 67.55  | 113.75 | 53.11  | 33.63 | 50.46  | 57.20  |
| chr10 | 73567035 | 73567163 | CDH23  | 44.71  | 52.68  | 43.12  | 66.67  | 98.13  | 51.55  | 52.27  | 70.61  | 62.40  | 121.19 | 59.11  | 23.54 | 62.66  | 62.16  |
| chr10 | 73567274 | 73567524 | CDH23  | 81.45  | 105.56 | 65.24  | 95.15  | 142.31 | 86.68  | 101.56 | 153.45 | 106.56 | 223.18 | 89.97  | 76.43 | 111.78 | 110.63 |
| chr10 | 73567604 | 73567764 | CDH23  | 86.91  | 98.22  | 56.62  | 80.08  | 140.35 | 56.76  | 101.99 | 136.94 | 106.48 | 202.72 | 84.66  | 49.09 | 111.53 | 100.07 |
| chr10 | 73569578 | 73569833 | CDH23  | 110.57 | 138.96 | 80.55  | 120.77 | 205.26 | 94.11  | 136.55 | 184.86 | 124.52 | 321.88 | 128.50 | 90.31 | 137.95 | 144.74 |
| chr10 | 73570230 | 73570326 | CDH23  | 64.63  | 76.76  | 54.77  |        |        |        |        |        |        |        |        |       |        |        |

|       |          |          |       |       |        |       |       |        |       |        |        |        |        |       |       |       |        |
|-------|----------|----------|-------|-------|--------|-------|-------|--------|-------|--------|--------|--------|--------|-------|-------|-------|--------|
| chr11 | 17523487 | 17523527 | USH1C | 63.95 | 72.39  | 42.02 | 47.76 | 82.90  | 58.10 | 57.59  | 96.76  | 71.10  | 105.02 | 68.80 | 32.15 | 55.29 | 66.54  |
| chr11 | 17526195 | 17526244 | USH1C | 67.56 | 118.92 | 92.44 | 76.34 | 123.10 | 85.98 | 115.86 | 150.72 | 150.94 | 167.04 | 93.64 | 59.72 | 91.32 | 108.52 |
| chr11 | 17527378 | 17527496 | USH1C | 46.92 | 51.46  | 25.08 | 37.10 | 63.35  | 38.52 | 53.34  | 52.93  | 60.55  | 104.07 | 52.18 | 25.77 | 44.73 | 50.94  |
| chr11 | 17530904 | 17531385 | USH1C | 42.06 | 58.81  | 36.53 | 46.31 | 71.61  | 43.68 | 65.60  | 86.58  | 65.56  | 92.27  | 43.04 | 42.25 | 53.42 | 57.86  |
| chr11 | 17531953 | 17532068 | USH1C | 20.11 | 30.87  | 10.48 | 17.04 | 30.09  | 14.09 | 25.10  | 31.45  | 25.44  | 31.72  | 20.95 | 14.03 | 19.81 | 22.61  |
| chr11 | 17533450 | 17533601 | USH1C | 63.80 | 104.44 | 72.13 | 60.70 | 97.50  | 71.55 | 130.26 | 137.26 | 121.51 | 40.16  | 89.95 | 81.67 | 84.11 | 89.24  |
| chr11 | 17537789 | 17537837 | USH1C | 39.37 | 35.12  | 20.55 | 29.53 | 43.08  | 20.84 | 41.69  | 63.73  | 55.04  | 53.88  | 38.92 | 25.61 | 34.29 | 38.95  |
| chr11 | 17538949 | 17539021 | USH1C | 28.05 | 28.40  | 16.63 | 27.08 | 37.64  | 22.86 | 24.88  | 23.77  | 32.18  | 68.19  | 26.96 | 22.22 | 34.96 | 29.91  |
| chr11 | 17542418 | 17542541 | USH1C | 53.07 | 86.85  | 52.07 | 55.23 | 89.27  | 66.44 | 92.44  | 142.34 | 107.83 | 77.71  | 72.62 | 54.63 | 63.77 | 79.21  |
| chr11 | 17542894 | 17542958 | USH1C | 64.28 | 126.23 | 69.45 | 68.72 | 106.54 | 65.68 | 125.98 | 187.35 | 131.89 | 88.66  | 69.94 | 57.29 | 89.97 | 96.83  |
| chr11 | 17544332 | 17544473 | USH1C | 43.90 | 40.08  | 22.22 | 29.25 | 57.06  | 29.32 | 39.05  | 30.26  | 37.35  | 76.76  | 36.94 | 28.33 | 45.58 | 39.21  |
| chr11 | 17544759 | 17544814 | USH1C | 74.30 | 57.18  | 53.07 | 64.21 | 92.82  | 38.39 | 56.75  | 94.52  | 80.57  | 130.20 | 49.13 | 46.75 | 61.55 | 69.82  |
| chr11 | 17544967 | 17545025 | USH1C | 37.64 | 30.76  | 56.24 | 35.54 | 31.61  | 72.56 | 43.68  | 58.54  | 41.39  | 35.54  | 39.08 | 32.05 | 36.24 | 42.89  |
| chr11 | 17545999 | 17546082 | USH1C | 34.98 | 25.39  | 19.54 | 36.27 | 61.70  | 26.17 | 33.50  | 45.19  | 29.21  | 65.05  | 29.88 | 23.05 | 33.87 | 35.83  |
| chr11 | 17547895 | 17547988 | USH1C | 44.82 | 91.60  | 73.54 | 89.00 | 109.98 | 54.83 | 82.67  | 106.11 | 82.27  | 173.13 | 70.65 | 48.82 | 90.68 | 85.62  |
| chr11 | 17548301 | 17548357 | USH1C | 64.54 | 55.84  | 55.79 | 62.44 | 90.16  | 58.91 | 72.88  | 74.32  | 61.91  | 136.32 | 69.39 | 45.61 | 80.12 | 70.68  |
| chr11 | 17548564 | 17548587 | USH1C | 20.71 | 15.00  | 20.46 | 19.92 | 38.38  | 33.88 | 24.54  | 24.83  | 24.79  | 60.79  | 22.29 | 12.58 | 32.21 | 26.51  |
| chr11 | 17548771 | 17548878 | USH1C | 20.89 | 25.18  | 17.37 | 21.78 | 41.30  | 20.50 | 35.97  | 44.38  | 33.58  | 34.45  | 27.62 | 16.25 | 27.45 | 28.27  |
| chr11 | 17552702 | 17552839 | USH1C | 28.36 | 29.20  | 28.58 | 42.86 | 64.04  | 26.26 | 41.33  | 39.91  | 43.06  | 84.78  | 34.52 | 19.61 | 47.57 | 40.21  |
| chr11 | 17552947 | 17553089 | USH1C | 35.60 | 41.74  | 22.29 | 38.81 | 63.67  | 33.00 | 48.51  | 49.20  | 35.48  | 103.45 | 34.36 | 22.45 | 47.07 | 44.05  |
| chr11 | 17554803 | 17554869 | USH1C | 24.00 | 43.34  | 30.36 | 37.33 | 41.72  | 41.31 | 49.24  | 46.78  | 34.39  | 65.61  | 35.58 | 27.93 | 35.19 | 39.80  |
| chr11 | 17565820 | 17565963 | USH1C | 31.69 | 41.28  | 30.72 | 57.58 | 82.16  | 32.38 | 43.98  | 53.30  | 46.35  | 107.84 | 49.54 | 35.60 | 59.48 | 51.03  |
| chr11 | 17568921 | 17569093 | OTOG  | 27.66 | 38.42  | 25.24 | 27.22 | 33.56  | 20.39 | 39.23  | 44.18  | 27.81  | 57.78  | 32.76 | 19.49 | 25.66 | 32.81  |
| chr11 | 17569475 | 17569534 | OTOG  | 3.38  | 1.77   | 3.22  | 2.37  | 10.23  | 3.72  | 5.38   | 4.30   | 5.73   | 16.35  | 3.00  | 3.23  | 4.03  | 5.22   |
| chr11 | 17569683 | 17569759 | OTOG  | 33.52 | 21.03  | 23.56 | 40.17 | 65.99  | 18.87 | 38.29  | 47.74  | 37.96  | 72.81  | 40.92 | 21.65 | 42.22 | 38.54  |
| chr11 | 17573548 | 17573622 | OTOG  | 58.95 | 55.81  | 32.81 | 61.55 | 96.84  | 59.51 | 60.72  | 107.75 | 70.59  | 133.57 | 66.39 | 39.39 | 73.29 | 70.32  |
| chr11 | 17574667 | 17574758 | OTOG  | 79.77 | 101.30 | 62.63 | 86.84 | 120.01 | 52.63 | 101.77 | 159.78 | 103.84 | 203.20 | 84.09 | 56.40 | 97.39 | 101.02 |
| chr11 | 17574913 | 17575066 | OTOG  | 62.41 | 91.32  | 63.34 | 71.44 | 99.42  | 57.94 | 99.83  | 125.40 | 117.58 | 173.99 | 65.54 | 64.80 | 82.81 | 91.08  |
| chr11 | 17577327 | 17577444 | OTOG  | 28.42 | 42.76  | 24.93 | 37.08 | 53.58  | 23.74 | 36.81  | 58.15  | 34.75  | 66.75  | 41.42 | 26.28 | 30.83 | 39.56  |
| chr11 | 17578666 | 17578870 | OTOG  | 36.58 | 47.16  | 29.71 | 47.90 | 71.06  | 37.80 | 47.46  | 82.30  | 53.24  | 122.46 | 53.08 | 33.25 | 51.97 | 55.17  |
| chr11 | 17579733 | 17579862 | OTOG  | 38.20 | 39.15  | 30.55 | 43.64 | 55.89  | 36.35 | 40.02  | 52.20  | 51.98  | 94.21  | 47.38 | 34.84 | 53.85 | 47.03  |
| chr11 | 17580086 | 17580191 | OTOG  | 46.95 | 51.92  | 32.03 | 54.42 | 94.41  | 41.24 | 60.25  | 79.05  | 58.17  | 128.34 | 55.56 | 45.64 | 55.43 | 62.33  |
| chr11 | 17580600 | 17580708 | OTOG  | 38.83 | 48.46  | 39.08 | 42.50 | 76.70  | 30.79 | 62.61  | 96.79  | 67.89  | 106.55 | 51.06 | 32.86 | 49.84 | 57.84  |
| chr11 | 17581082 | 17581209 | OTOG  | 49.89 | 67.75  | 42.13 | 60.18 | 90.95  | 41.87 | 57.15  | 83.24  | 63.86  | 126.95 | 62.52 | 40.25 | 66.20 | 65.56  |
| chr11 | 17582257 | 17582364 | OTOG  | 24.69 | 72.06  | 47.66 | 34.95 | 58.13  | 43.41 | 61.27  | 87.51  | 54.61  | 78.89  | 46.62 | 38.66 | 47.01 | 54.04  |
| chr11 | 17582639 | 17582684 | OTOG  | 62.72 | 75.26  | 46.57 | 45.46 | 73.54  | 61.78 | 67.93  | 124.00 | 80.93  | 113.22 | 74.37 | 36.41 | 55.50 | 71.85  |
| chr11 | 17583210 | 17583354 | OTOG  | 53.58 | 57.67  | 47.86 | 56.52 | 76.88  | 42.26 | 65.12  | 94.95  | 79.76  | 144.34 | 62.29 | 46.11 | 65.66 | 68.94  |
| chr11 | 17590704 | 17590835 | OTOG  | 31.96 | 32.89  | 25.84 | 37.08 | 44.54  | 31.34 | 35.41  | 42.91  | 40.84  | 62.55  | 35.64 | 31.33 | 37.33 | 37.69  |
| chr11 | 17591761 | 17591937 | OTOG  | 49.04 | 52.95  | 31.62 | 44.78 | 92.85  | 32.19 | 62.54  | 75.31  | 66.02  | 125.73 | 51.31 | 42.85 | 54.56 | 60.60  |
| chr11 | 17593628 | 17593751 | OTOG  | 66.71 | 75.60  | 53.64 | 66.88 | 95.89  | 52.42 | 67.95  | 122.03 | 85.82  | 136.23 | 87.48 | 43.62 | 54.05 | 79.52  |
| chr11 | 17594626 | 17594837 | OTOG  | 36.96 | 56.25  | 30.75 | 45.90 | 66.82  | 42.13 | 52.38  | 74.16  | 58.78  | 97.42  | 46.06 | 29.67 | 55.36 | 53.11  |
| chr11 | 17596268 | 17596459 | OTOG  | 41.03 | 55.54  | 39.86 | 50.70 | 85.39  | 39.65 | 55.58  | 80.19  | 69.72  | 108.41 | 51.13 | 46.71 | 63.14 | 60.33  |
| chr11 | 17598104 | 17598177 | OTOG  | 60.61 | 58.58  | 45.84 | 69.50 | 105.58 | 58.15 | 74.77  | 127.73 | 90.04  | 146.97 | 88.34 | 53.32 | 73.35 | 81.62  |
| chr11 | 17598416 | 17598458 | OTOG  | 55.56 | 65.16  | 51.42 | 52.63 | 93.79  | 47.12 | 75.12  | 94.30  | 83.02  | 141.72 | 68.47 | 45.23 | 51.53 | 72.79  |
| chr11 | 17599921 | 17600073 | OTOG  | 34.72 | 42.42  | 30.62 | 45.31 | 78.42  | 35.67 | 40.41  | 66.58  | 46.48  | 90.42  | 42.91 | 23.87 | 44.61 | 48.15  |
| chr11 | 17608022 | 17608128 | OTOG  | 34.24 | 34.25  | 27.31 | 43.71 | 42.65  | 21.53 | 34.11  | 65.38  | 45.16  | 41.54  | 32.25 | 26.33 | 40.57 | 37.37  |
| chr11 | 17612998 | 17613135 | OTOG  | 56.99 | 70.91  | 48.65 | 57.92 | 94.20  | 46.28 | 56.09  | 102.27 | 75.35  | 154.50 | 62.52 | 52.57 | 76.05 | 73.19  |
| chr11 | 17614741 | 17614874 | OTOG  | 80.50 | 125.49 | 84.90 | 80.20 | 98.58  | 61.53 | 117.44 | 193.76 | 159.60 | 49.59  | 88.65 | 78.96 | 88.78 | 101.60 |
| chr11 | 17615158 | 17615303 | OTOG  | 13.78 | 14.60  | 6.02  | 18.78 | 22.86  | 15.45 | 16.51  | 29.42  | 20.29  | 39.59  | 22.40 | 8.31  | 16.80 | 19.00  |
| chr11 | 17615595 | 17615713 | OTOG  | 58.00 | 50.77  | 50.50 | 71.36 | 75.86  | 38.60 | 59.35  | 65.68  | 75.31  | 125.27 | 69.64 | 54.46 | 72.64 | 66.23  |
| chr11 | 17617586 | 17617701 | OTOG  | 60.70 | 66.44  | 43.88 | 57.97 | 82.84  | 44.43 | 55.56  | 103.16 | 61.07  | 103.57 | 64.46 | 45.93 | 49.45 | 65.83  |
| chr11 | 17618399 | 17618554 | OTOG  | 25.99 | 30.60  | 24.95 | 38.13 | 43.27  | 25.72 | 34.28  | 53.12  | 41.16  | 76.68  | 36.85 | 28.10 | 36.22 | 38.24  |
| chr11 | 17621219 | 17621244 | OTOG  | 53.85 | 88.85  | 60.35 | 65.50 | 92.23  | 61.38 | 89.35  | 110.00 | 101.92 | 137.65 | 73.27 | 62.08 | 73.58 | 83.04  |
| chr11 | 17623758 | 17623924 | OTOG  | 27.33 | 23.95  | 16.27 | 19.30 | 30.76  | 15.95 | 16.07  | 31.60  | 35.03  | 53.25  | 20.07 | 19.17 | 27.32 | 25.73  |
| chr11 | 17627405 | 17627682 | OTOG  | 52.99 | 55.08  | 43.61 | 61.91 | 84.64  | 49.37 | 60.31  | 75.48  | 65.32  | 137.91 | 58.02 | 40.94 | 75.24 | 65.47  |
| chr11 | 17629844 | 17629960 | OTOG  | 23.00 | 35.47  | 24.33 | 28.80 | 61.74  | 17.29 | 26.48  | 48.62  | 36.60  | 72.72  | 34.96 | 25.35 | 36.91 | 36.28  |
| chr11 | 17630678 | 17630756 | OTOG  | 47.28 | 54.54  | 44.65 | 50.27 | 70.47  | 32.33 | 60.99  | 81.01  | 55.59  | 69.61  | 37.66 | 41.01 | 47.06 | 53.78  |
| chr11 | 17631203 | 17632970 | OTOG  | 68.56 | 79.00  | 54.96 | 75.01 | 125.41 | 61.90 | 73.27  | 102.81 | 87.96  | 173.19 | 79.93 | 54.43 | 90.03 | 86.37  |
| chr11 | 17633710 | 17633877 | OTOG  | 37.50 | 42.83  | 34.42 | 39.81 | 63.72  | 39.03 | 49.83  | 69.32  | 42.86  | 100.45 | 45.55 | 33.62 | 38.51 | 49.91  |
| chr11 | 17634168 | 17634312 | OTOG  | 43.74 | 47.54  | 38.73 | 45.26 | 83.41  | 39.40 | 53.40  | 67.60  | 53.01  | 105.47 | 55.08 | 28.61 | 53.61 | 55.10  |
| chr11 | 17635160 | 17635248 | OTOG  | 50.44 | 52.99  | 40.25 | 56.19 | 84.25  | 42.96 | 62.99  | 111.00 | 64.62  | 122.04 | 60.80 | 37.02 | 59.44 | 65.46  |
| chr11 | 17650681 | 17650863 | OTOG  | 27.28 | 34.53  | 19.83 | 34.69 | 66.71  | 28.87 | 34.17  | 57.75  | 39.30  | 72.45  | 27.03 | 22.56 | 35.79 | 38.76  |
| chr11 | 17653250 | 17653469 | OTOG  | 57.83 | 72.01  | 57.75 | 57.18 | 101.88 | 52.82 | 86.71  | 117.02 | 76.83  | 140.34 | 71.93 | 49.85 | 79.59 | 78.51  |
| chr11 | 17653636 | 17653773 | OTOG  | 30.49 | 29.64  | 29.90 | 31.46 | 45.67  | 27.46 | 33.30  | 46.30  | 28.61  | 67.03  | 31.91 | 15.96 | 34.05 | 34.81  |
| chr11 | 17655228 | 17655421 | OTOG  | 17.44 | 21.96  | 19.98 | 27.21 | 53.12  | 24.81 | 26.74  | 29.93  | 32.76  | 79.04  | 28.12 | 19.25 | 30.99 | 31.69  |
| chr11 | 17655617 | 17655828 | OTOG  | 16.14 | 26.57  | 15.35 | 31.46 | 36.20  | 13.72 | 26.41  | 34.09  | 28.98  | 48.15  | 25.27 | 21.10 | 20.53 |        |

|       |           |           |        |        |        |       |        |        |        |        |        |        |        |        |        |        |        |
|-------|-----------|-----------|--------|--------|--------|-------|--------|--------|--------|--------|--------|--------|--------|--------|--------|--------|--------|
| chr11 | 71800464  | 71800642  | LRTOMT | 44.17  | 72.48  | 40.30 | 41.79  | 60.76  | 30.85  | 65.67  | 70.86  | 76.05  | 29.33  | 52.72  | 35.91  | 46.61  | 51.74  |
| chr11 | 71804543  | 71804747  | LRTOMT | 17.36  | 19.69  | 32.51 | 17.00  | 24.18  | 28.11  | 28.11  | 29.13  | 33.52  | 24.30  | 20.27  | 19.16  | 16.02  | 24.45  |
| chr11 | 71805995  | 71806146  | LRTOMT | 70.57  | 94.97  | 66.38 | 66.18  | 107.41 | 55.24  | 97.01  | 105.80 | 95.11  | 126.86 | 96.93  | 57.74  | 64.14  | 86.68  |
| chr11 | 71806426  | 71807938  | LRTOMT | 16.67  | 24.12  | 17.73 | 18.83  | 26.68  | 16.82  | 23.37  | 30.28  | 25.29  | 22.64  | 21.01  | 15.78  | 22.05  | 21.60  |
| chr11 | 71816011  | 71816058  | LRTOMT | 47.90  | 60.21  | 54.31 | 54.85  | 72.79  | 51.96  | 49.88  | 82.48  | 65.29  | 128.54 | 57.25  | 47.31  | 66.63  | 64.40  |
| chr11 | 71816983  | 71817256  | LRTOMT | 60.13  | 63.30  | 42.79 | 60.26  | 76.37  | 57.25  | 64.56  | 73.05  | 58.06  | 108.39 | 65.19  | 49.55  | 65.25  | 64.91  |
| chr11 | 71818970  | 71819165  | LRTOMT | 73.62  | 124.53 | 69.08 | 91.91  | 119.43 | 81.82  | 121.62 | 141.05 | 127.39 | 175.72 | 98.01  | 75.67  | 100.26 | 108.32 |
| chr11 | 71819652  | 71819971  | LRTOMT | 48.48  | 52.21  | 47.87 | 51.20  | 102.01 | 50.81  | 55.84  | 102.16 | 66.26  | 137.98 | 53.54  | 31.87  | 70.37  | 66.68  |
| chr11 | 76841636  | 76841698  | MYO7A  | 50.43  | 75.41  | 61.27 | 68.65  | 103.37 | 68.44  | 95.79  | 119.78 | 85.03  | 149.37 | 73.87  | 62.33  | 76.75  | 84.48  |
| chr11 | 76853756  | 76853868  | MYO7A  | 57.20  | 56.08  | 35.64 | 55.98  | 90.28  | 43.27  | 74.95  | 87.00  | 60.83  | 135.38 | 48.58  | 33.93  | 54.40  | 64.93  |
| chr11 | 76858845  | 76858996  | MYO7A  | 62.89  | 65.13  | 48.45 | 84.06  | 113.15 | 65.60  | 72.37  | 89.25  | 86.22  | 180.74 | 80.41  | 56.93  | 99.34  | 83.77  |
| chr11 | 76866954  | 76867137  | MYO7A  | 51.81  | 81.18  | 56.96 | 77.51  | 109.51 | 65.15  | 91.40  | 98.45  | 98.36  | 158.68 | 69.47  | 61.82  | 81.58  | 85.02  |
| chr11 | 76867707  | 76867827  | MYO7A  | 57.74  | 56.08  | 57.66 | 65.03  | 96.57  | 55.89  | 62.50  | 105.19 | 75.88  | 152.87 | 77.67  | 44.02  | 78.30  | 75.59  |
| chr11 | 76867909  | 76868050  | MYO7A  | 109.00 | 102.46 | 98.04 | 119.49 | 171.49 | 88.01  | 130.01 | 204.55 | 129.19 | 283.12 | 136.15 | 67.75  | 129.08 | 136.60 |
| chr11 | 76868326  | 76868438  | MYO7A  | 26.50  | 36.82  | 23.61 | 36.35  | 57.65  | 28.27  | 47.45  | 71.34  | 54.85  | 86.30  | 39.44  | 23.48  | 48.12  | 44.34  |
| chr11 | 76869324  | 76869476  | MYO7A  | 45.37  | 46.01  | 34.32 | 43.61  | 85.69  | 42.39  | 31.63  | 72.51  | 50.06  | 112.30 | 41.97  | 32.55  | 54.59  | 53.20  |
| chr11 | 76870494  | 76870569  | MYO7A  | 35.46  | 83.36  | 61.66 | 71.71  | 120.09 | 58.25  | 82.51  | 122.57 | 83.68  | 151.57 | 74.72  | 56.03  | 69.89  | 83.47  |
| chr11 | 76871210  | 76871328  | MYO7A  | 25.39  | 36.50  | 22.55 | 39.13  | 48.01  | 27.15  | 34.15  | 52.29  | 35.98  | 74.88  | 26.71  | 22.70  | 24.58  | 37.12  |
| chr11 | 76872020  | 76872161  | MYO7A  | 38.39  | 52.34  | 42.49 | 43.83  | 65.27  | 28.39  | 55.89  | 92.51  | 80.26  | 90.78  | 58.44  | 24.06  | 52.56  | 56.05  |
| chr11 | 76873167  | 76873376  | MYO7A  | 21.45  | 35.80  | 15.67 | 31.07  | 45.92  | 20.42  | 27.76  | 46.88  | 31.28  | 59.95  | 33.29  | 15.91  | 23.53  | 32.12  |
| chr11 | 76873900  | 76874034  | MYO7A  | 89.24  | 128.70 | 91.64 | 103.13 | 164.07 | 111.84 | 133.77 | 175.01 | 147.16 | 216.39 | 119.29 | 106.36 | 112.84 | 132.22 |
| chr11 | 76877103  | 76877208  | MYO7A  | 77.38  | 92.21  | 54.80 | 88.03  | 107.83 | 63.93  | 95.24  | 130.68 | 113.67 | 192.83 | 91.95  | 58.25  | 88.18  | 97.23  |
| chr11 | 76883795  | 76883931  | MYO7A  | 59.39  | 84.72  | 38.26 | 73.18  | 109.48 | 57.26  | 78.18  | 101.65 | 83.95  | 180.97 | 65.69  | 38.71  | 90.02  | 80.95  |
| chr11 | 76885803  | 76885960  | MYO7A  | 37.01  | 56.46  | 34.39 | 47.75  | 80.28  | 27.37  | 44.97  | 81.28  | 42.35  | 124.89 | 46.79  | 23.39  | 58.78  | 53.91  |
| chr11 | 76886419  | 76886510  | MYO7A  | 96.79  | 129.32 | 84.72 | 109.67 | 174.97 | 77.13  | 120.74 | 193.85 | 153.05 | 275.97 | 108.15 | 78.95  | 113.70 | 133.61 |
| chr11 | 76888596  | 76888689  | MYO7A  | 112.79 | 98.71  | 70.44 | 106.39 | 170.91 | 86.73  | 107.23 | 165.97 | 123.14 | 258.23 | 103.86 | 80.98  | 117.55 | 123.78 |
| chr11 | 76890092  | 76890175  | MYO7A  | 68.29  | 79.61  | 67.58 | 79.12  | 103.35 | 50.13  | 79.10  | 119.27 | 79.52  | 191.23 | 88.33  | 46.42  | 76.65  | 87.66  |
| chr11 | 76890782  | 76890999  | MYO7A  | 16.72  | 18.00  | 18.31 | 20.71  | 35.14  | 15.53  | 18.89  | 27.50  | 21.66  | 45.18  | 6.76   | 13.18  | 18.44  | 21.47  |
| chr11 | 76891421  | 76891527  | MYO7A  | 37.93  | 72.47  | 47.29 | 61.64  | 85.37  | 46.27  | 60.68  | 86.13  | 77.92  | 130.00 | 57.00  | 40.51  | 67.26  | 66.93  |
| chr11 | 76892427  | 76892635  | MYO7A  | 45.67  | 67.84  | 44.39 | 52.78  | 87.57  | 48.12  | 61.22  | 84.96  | 66.30  | 133.81 | 57.96  | 42.79  | 68.96  | 66.12  |
| chr11 | 76892998  | 76893200  | MYO7A  | 36.78  | 51.98  | 27.36 | 39.08  | 67.75  | 45.54  | 36.28  | 61.13  | 43.60  | 101.21 | 34.13  | 34.56  | 39.87  | 48.28  |
| chr11 | 76893470  | 76893645  | MYO7A  | 48.19  | 54.48  | 41.52 | 58.97  | 91.74  | 39.97  | 56.60  | 83.62  | 80.07  | 121.98 | 67.38  | 41.72  | 54.11  | 65.52  |
| chr11 | 76894114  | 76894202  | MYO7A  | 30.18  | 58.79  | 32.58 | 47.98  | 80.44  | 37.57  | 71.16  | 91.26  | 61.40  | 120.19 | 52.70  | 27.69  | 59.75  | 59.33  |
| chr11 | 76895634  | 76895794  | MYO7A  | 25.02  | 30.78  | 37.31 | 32.63  | 57.42  | 29.22  | 38.01  | 75.21  | 57.73  | 73.80  | 34.43  | 19.71  | 30.59  | 42.61  |
| chr11 | 76900390  | 76900515  | MYO7A  | 55.90  | 68.54  | 49.45 | 52.48  | 112.94 | 51.55  | 65.90  | 112.21 | 79.90  | 138.42 | 73.25  | 46.28  | 69.98  | 75.57  |
| chr11 | 76901066  | 76901184  | MYO7A  | 21.37  | 30.59  | 11.70 | 24.55  | 42.78  | 14.90  | 24.76  | 45.37  | 36.55  | 61.07  | 28.11  | 11.67  | 38.78  | 29.45  |
| chr11 | 76901743  | 76901915  | MYO7A  | 67.34  | 77.46  | 63.89 | 69.82  | 100.94 | 63.45  | 89.38  | 109.84 | 96.23  | 152.47 | 73.25  | 46.70  | 74.18  | 84.23  |
| chr11 | 76903097  | 76903323  | MYO7A  | 40.42  | 54.03  | 35.89 | 49.56  | 67.45  | 50.04  | 45.77  | 81.89  | 53.96  | 116.30 | 40.07  | 33.59  | 61.53  | 55.75  |
| chr11 | 76905400  | 76905569  | MYO7A  | 32.05  | 39.88  | 31.57 | 37.74  | 70.16  | 28.36  | 38.56  | 55.09  | 41.75  | 93.16  | 44.62  | 16.61  | 44.98  | 44.15  |
| chr11 | 76908527  | 76908643  | MYO7A  | 24.78  | 50.68  | 27.41 | 28.76  | 42.95  | 20.47  | 35.83  | 52.17  | 43.64  | 61.20  | 37.09  | 23.73  | 34.65  | 37.39  |
| chr11 | 76909541  | 76909666  | MYO7A  | 38.14  | 33.41  | 24.48 | 42.47  | 64.90  | 37.18  | 36.43  | 67.70  | 44.72  | 105.68 | 44.13  | 30.64  | 46.29  | 47.49  |
| chr11 | 76910581  | 76910863  | MYO7A  | 30.14  | 29.06  | 28.61 | 36.88  | 61.68  | 28.35  | 42.90  | 57.79  | 47.77  | 85.28  | 41.28  | 33.16  | 41.28  | 43.57  |
| chr11 | 76912494  | 76912683  | MYO7A  | 34.01  | 52.17  | 47.53 | 50.35  | 74.75  | 37.89  | 62.62  | 85.43  | 63.79  | 121.68 | 53.89  | 33.63  | 56.43  | 59.81  |
| chr11 | 76913346  | 76913469  | MYO7A  | 35.06  | 43.02  | 27.00 | 38.59  | 67.81  | 36.48  | 50.41  | 60.03  | 55.81  | 78.19  | 34.54  | 26.83  | 43.07  | 46.15  |
| chr11 | 76914106  | 76914262  | MYO7A  | 8.87   | 4.28   | 3.39  | 10.92  | 16.30  | 3.33   | 8.12   | 9.71   | 8.36   | 23.07  | 11.18  | 6.87   | 9.22   | 9.53   |
| chr11 | 76915122  | 76915274  | MYO7A  | 69.71  | 82.19  | 64.78 | 79.41  | 123.24 | 53.46  | 86.29  | 110.38 | 88.52  | 166.17 | 93.43  | 64.10  | 76.00  | 90.14  |
| chr11 | 76916508  | 76916662  | MYO7A  | 58.89  | 61.21  | 36.06 | 70.10  | 101.67 | 37.72  | 64.30  | 78.97  | 81.65  | 154.17 | 66.60  | 42.85  | 65.88  | 71.18  |
| chr11 | 76917143  | 76917247  | MYO7A  | 65.21  | 110.03 | 61.92 | 94.21  | 130.36 | 85.63  | 115.29 | 169.25 | 131.04 | 226.44 | 98.05  | 69.02  | 97.71  | 113.04 |
| chr11 | 76918335  | 76918447  | MYO7A  | 36.84  | 40.61  | 27.07 | 31.81  | 73.08  | 34.12  | 33.56  | 58.62  | 42.12  | 106.88 | 37.16  | 24.86  | 44.89  | 45.56  |
| chr11 | 76919476  | 76919562  | MYO7A  | 33.99  | 61.62  | 43.90 | 36.33  | 60.91  | 42.95  | 46.08  | 110.82 | 58.40  | 98.14  | 41.40  | 25.29  | 48.10  | 54.99  |
| chr11 | 76919743  | 76919848  | MYO7A  | 52.98  | 62.80  | 55.94 | 60.80  | 95.95  | 48.78  | 75.97  | 120.66 | 75.11  | 124.08 | 51.20  | 40.19  | 67.21  | 72.04  |
| chr11 | 76922198  | 76922382  | MYO7A  | 61.31  | 66.36  | 44.66 | 56.83  | 95.99  | 37.86  | 77.35  | 110.32 | 70.92  | 161.23 | 67.05  | 46.90  | 62.71  | 74.73  |
| chr11 | 76922867  | 76922982  | MYO7A  | 69.56  | 98.30  | 54.28 | 75.26  | 96.39  | 49.58  | 71.64  | 112.30 | 92.30  | 158.16 | 70.22  | 55.19  | 76.83  | 83.60  |
| chr11 | 76923998  | 76924080  | MYO7A  | 40.76  | 49.64  | 41.37 | 48.64  | 62.81  | 32.72  | 65.13  | 69.40  | 68.99  | 81.99  | 47.70  | 33.52  | 47.18  | 53.56  |
| chr11 | 76924906  | 76925024  | MYO7A  | 72.39  | 77.31  | 68.25 | 78.95  | 105.25 | 69.79  | 90.91  | 134.87 | 102.40 | 200.34 | 103.38 | 54.30  | 83.89  | 96.51  |
| chr11 | 76925653  | 76925741  | MYO7A  | 64.92  | 74.35  | 73.22 | 79.85  | 119.36 | 41.63  | 67.81  | 119.84 | 83.39  | 135.98 | 82.63  | 47.29  | 70.27  | 82.52  |
| chr11 | 110070307 | 110070403 | RDX    | 80.10  | 109.56 | 76.46 | 70.43  | 108.20 | 67.72  | 112.90 | 201.68 | 127.21 | 75.02  | 90.98  | 64.85  | 66.46  | 98.76  |
| chr11 | 110102595 | 110102758 | RDX    | 11.61  | 10.20  | 14.74 | 5.49   | 6.81   | 9.95   | 11.13  | 12.73  | 17.25  | 3.74   | 10.26  | 9.49   | 10.85  | 10.28  |
| chr11 | 110103963 | 110104204 | RDX    | 15.86  | 35.24  | 21.28 | 24.23  | 30.25  | 12.94  | 40.98  | 53.62  | 50.65  | 19.13  | 28.26  | 23.31  | 32.28  | 29.65  |
| chr11 | 110106825 | 110106916 | RDX    | 2.88   | 17.66  | 15.39 | 5.96   | 9.54   | 8.74   | 9.59   | 12.42  | 23.59  | 0.00   | 12.18  | 7.23   | 5.05   | 10.43  |
| chr11 | 110108218 | 110108377 | RDX    | 22.93  | 48.10  | 33.54 | 22.31  | 24.08  | 29.12  | 54.94  | 60.21  | 57.05  | 6.38   | 26.41  | 41.57  | 25.84  | 35.55  |
| chr11 | 110118429 | 110118558 | RDX    | 15.32  | 34.88  | 24.48 | 12.81  | 18.23  | 26.24  | 44.18  | 41.41  | 47.05  | 0.00   | 19.78  | 39.77  | 22.66  | 27.01  |
| chr11 | 110124672 | 110124834 | RDX    | 34.46  | 61.88  | 39.26 | 35.62  | 39.04  | 38.02  | 46.36  | 81.18  | 85.85  | 0.00   | 42.91  | 35.69  | 36.12  | 45.02  |
| chr11 | 110126015 | 110126110 | RDX    | 17.16  | 40.74  | 25.89 | 31.82  | 34.31  | 27.28  | 42.94  | 50.10  | 63.96  | 0.00   | 32.21  | 31.35  | 31.73  | 33.15  |
| chr11 | 110128493 | 110128638 | RDX    | 13.33  | 12.63  | 14.14 | 12.27  | 14.15  | 14.60  | 17.55  | 14.01  | 24.77  | 0.00   | 16.95  | 9.86   | 8.83   | 13.69  |
| chr11 | 110128832 | 110128914 | RDX    |        |        |       |        |        |        |        |        |        |        |        |        |        |        |



|       |           |           |       |        |        |        |        |        |        |        |        |        |        |        |        |        |        |
|-------|-----------|-----------|-------|--------|--------|--------|--------|--------|--------|--------|--------|--------|--------|--------|--------|--------|--------|
| chr11 | 121016265 | 121016825 | TECTA | 78.53  | 102.79 | 68.54  | 86.49  | 134.69 | 73.48  | 116.16 | 164.80 | 117.00 | 182.36 | 89.92  | 71.83  | 91.24  | 107.21 |
| chr11 | 121023591 | 121023789 | TECTA | 46.01  | 61.63  | 49.45  | 54.96  | 82.70  | 52.29  | 73.32  | 95.57  | 73.28  | 130.98 | 73.74  | 40.63  | 66.59  | 69.55  |
| chr11 | 121028551 | 121028933 | TECTA | 89.35  | 111.94 | 83.23  | 107.11 | 154.25 | 89.21  | 121.25 | 156.20 | 142.59 | 220.66 | 101.10 | 81.24  | 109.61 | 121.51 |
| chr11 | 121030845 | 121031130 | TECTA | 49.78  | 98.83  | 59.26  | 69.98  | 90.91  | 59.62  | 81.16  | 131.70 | 96.91  | 106.13 | 65.60  | 64.49  | 84.35  | 81.20  |
| chr11 | 121032785 | 121033079 | TECTA | 51.10  | 40.25  | 32.16  | 55.64  | 82.02  | 44.66  | 48.66  | 71.85  | 64.53  | 106.47 | 44.33  | 43.50  | 58.33  | 57.10  |
| chr11 | 121035983 | 121036092 | TECTA | 60.99  | 91.67  | 61.24  | 63.75  | 93.27  | 52.26  | 91.94  | 146.67 | 116.75 | 149.92 | 66.13  | 52.61  | 83.41  | 87.27  |
| chr11 | 121037288 | 121037489 | TECTA | 23.91  | 52.88  | 28.96  | 34.00  | 67.28  | 31.99  | 60.55  | 71.76  | 50.50  | 71.57  | 42.92  | 28.68  | 39.88  | 47.08  |
| chr11 | 121038764 | 121038926 | TECTA | 74.13  | 125.18 | 84.52  | 84.47  | 115.44 | 88.75  | 142.07 | 211.53 | 128.71 | 102.64 | 114.98 | 85.82  | 82.56  | 113.19 |
| chr11 | 121039387 | 121039634 | TECTA | 65.64  | 103.78 | 72.94  | 77.35  | 93.44  | 65.53  | 105.90 | 138.69 | 126.72 | 86.25  | 99.24  | 63.28  | 80.54  | 91.56  |
| chr11 | 121058542 | 121058703 | TECTA | 60.36  | 79.95  | 59.17  | 69.36  | 98.65  | 64.78  | 92.25  | 145.80 | 101.26 | 58.38  | 68.21  | 51.26  | 66.11  | 79.12  |
| chr11 | 121059790 | 121059876 | TECTA | 97.78  | 164.15 | 98.10  | 91.02  | 134.28 | 86.56  | 151.64 | 215.61 | 170.18 | 52.98  | 117.75 | 89.59  | 118.64 | 122.47 |
| chr11 | 121060474 | 121060589 | TECTA | 39.49  | 40.44  | 27.16  | 32.17  | 55.27  | 29.22  | 53.19  | 63.28  | 48.44  | 72.04  | 32.00  | 20.25  | 44.34  | 42.75  |
| chr11 | 121061416 | 121061515 | TECTA | 91.67  | 148.63 | 80.11  | 82.67  | 124.73 | 87.82  | 154.37 | 211.79 | 151.49 | 14.92  | 93.58  | 99.19  | 96.85  | 111.25 |
| chr12 | 15774252  | 15774364  | EPS8  | 52.79  | 75.35  | 55.02  | 59.01  | 70.47  | 63.18  | 86.84  | 142.04 | 91.97  | 19.58  | 57.62  | 49.99  | 44.99  | 68.65  |
| chr12 | 15776093  | 15776221  | EPS8  | 124.22 | 228.98 | 147.55 | 124.53 | 181.81 | 131.18 | 244.81 | 312.72 | 264.56 | 55.65  | 159.74 | 146.42 | 149.85 | 176.85 |
| chr12 | 15777162  | 15777341  | EPS8  | 18.97  | 34.24  | 13.06  | 16.27  | 29.94  | 17.43  | 22.32  | 38.59  | 23.43  | 15.29  | 23.02  | 11.78  | 16.90  | 22.03  |
| chr12 | 15784377  | 15784598  | EPS8  | 27.05  | 44.21  | 31.50  | 33.83  | 56.56  | 35.74  | 45.99  | 76.95  | 42.17  | 60.15  | 34.21  | 34.66  | 32.95  | 43.59  |
| chr12 | 15793638  | 15793780  | EPS8  | 78.43  | 121.26 | 86.22  | 83.31  | 116.02 | 80.16  | 129.99 | 183.71 | 144.63 | 16.83  | 90.44  | 77.06  | 74.65  | 100.67 |
| chr12 | 15794657  | 15794764  | EPS8  | 15.05  | 44.85  | 35.29  | 8.17   | 26.40  | 29.40  | 36.52  | 23.52  | 55.81  | 1.43   | 20.61  | 25.06  | 20.65  | 26.84  |
| chr12 | 15800062  | 15800194  | EPS8  | 63.05  | 77.69  | 51.76  | 42.35  | 75.41  | 44.98  | 81.03  | 127.56 | 98.29  | 21.58  | 58.45  | 47.60  | 58.56  | 65.81  |
| chr12 | 15803758  | 15803940  | EPS8  | 80.46  | 132.87 | 80.40  | 85.49  | 122.15 | 65.95  | 145.50 | 181.81 | 149.10 | 56.13  | 107.96 | 63.98  | 85.66  | 105.98 |
| chr12 | 15807080  | 15807227  | EPS8  | 72.53  | 129.36 | 92.47  | 99.22  | 110.07 | 79.78  | 165.21 | 235.49 | 145.48 | 13.59  | 94.06  | 94.26  | 93.01  | 110.96 |
| chr12 | 15811014  | 15811087  | EPS8  | 65.61  | 111.23 | 76.35  | 66.77  | 105.54 | 53.69  | 126.26 | 158.89 | 125.23 | 4.66   | 82.08  | 58.72  | 64.80  | 86.25  |
| chr12 | 15811432  | 15811519  | EPS8  | 61.82  | 101.68 | 76.07  | 58.60  | 88.52  | 49.84  | 89.59  | 98.97  | 122.72 | 30.10  | 104.15 | 50.83  | 69.83  | 77.74  |
| chr12 | 15813549  | 15813674  | EPS8  | 19.49  | 24.52  | 31.94  | 22.60  | 27.87  | 25.92  | 32.65  | 39.87  | 42.08  | 17.28  | 28.41  | 25.84  | 27.28  | 28.21  |
| chr12 | 15814961  | 15815033  | EPS8  | 95.66  | 161.68 | 100.33 | 81.84  | 141.47 | 103.36 | 168.67 | 192.78 | 188.44 | 16.55  | 120.36 | 101.00 | 109.11 | 122.68 |
| chr12 | 15818691  | 15818826  | EPS8  | 42.72  | 48.46  | 38.91  | 43.86  | 71.24  | 34.85  | 60.15  | 74.10  | 70.01  | 60.08  | 42.42  | 42.18  | 37.94  | 52.42  |
| chr12 | 15819375  | 15819456  | EPS8  | 88.10  | 166.87 | 88.61  | 73.66  | 112.51 | 82.85  | 164.68 | 214.80 | 183.40 | 19.33  | 95.82  | 77.71  | 86.38  | 114.03 |
| chr12 | 15822322  | 15822470  | EPS8  | 83.62  | 134.09 | 76.93  | 78.07  | 121.91 | 81.13  | 143.74 | 174.91 | 147.64 | 33.69  | 89.07  | 91.03  | 80.13  | 104.65 |
| chr12 | 15822599  | 15822759  | EPS8  | 56.25  | 128.19 | 77.31  | 60.25  | 105.37 | 66.31  | 130.70 | 157.33 | 154.24 | 4.91   | 87.76  | 78.85  | 71.49  | 92.70  |
| chr12 | 15823791  | 15823857  | EPS8  | 111.00 | 225.73 | 138.07 | 107.94 | 189.78 | 139.24 | 242.19 | 265.39 | 258.61 | 3.31   | 169.12 | 142.72 | 127.24 | 166.09 |
| chr12 | 15834161  | 15834236  | EPS8  | 21.13  | 27.37  | 26.16  | 21.59  | 17.83  | 13.28  | 33.12  | 40.97  | 28.37  | 5.14   | 18.17  | 13.91  | 16.13  | 22.25  |
| chr12 | 15835828  | 15835906  | EPS8  | 16.48  | 31.43  | 16.14  | 11.54  | 26.29  | 18.39  | 35.24  | 30.97  | 43.25  | 0.65   | 28.91  | 37.33  | 26.53  | 24.72  |
| chr12 | 65672550  | 65672645  | MSRB3 | 32.04  | 27.71  | 25.09  | 32.03  | 55.88  | 26.88  | 36.60  | 36.88  | 34.39  | 90.70  | 37.26  | 20.30  | 46.07  | 37.98  |
| chr12 | 65700644  | 65700806  | MSRB3 | 0.00   | 1.56   | 1.22   | 0.00   | 1.47   | 0.05   | 0.00   | 0.00   | 0.75   | 0.39   | 0.00   | 0.00   | 0.00   | 0.45   |
| chr12 | 65702310  | 65702435  | MSRB3 | 88.17  | 159.61 | 94.71  | 103.73 | 143.67 | 82.55  | 177.02 | 298.78 | 188.07 | 136.09 | 105.75 | 92.84  | 104.71 | 139.25 |
| chr12 | 65720607  | 65720714  | MSRB3 | 94.80  | 121.98 | 84.61  | 84.55  | 125.23 | 67.26  | 111.06 | 148.32 | 137.86 | 45.16  | 88.68  | 69.87  | 92.19  | 98.28  |
| chr12 | 65722307  | 65722383  | MSRB3 | 24.10  | 60.58  | 28.12  | 27.92  | 33.53  | 34.99  | 54.87  | 72.10  | 58.88  | 0.00   | 24.90  | 25.82  | 32.81  | 37.15  |
| chr12 | 65762779  | 65762806  | MSRB3 | 24.96  | 57.86  | 36.93  | 20.04  | 26.71  | 33.32  | 48.46  | 35.11  | 47.89  | 4.96   | 28.50  | 38.43  | 27.57  | 33.60  |
| chr12 | 65847509  | 65847605  | MSRB3 | 73.42  | 128.31 | 79.74  | 85.12  | 113.28 | 68.79  | 130.30 | 226.06 | 141.59 | 79.63  | 104.95 | 70.56  | 94.78  | 108.48 |
| chr12 | 65856936  | 65857102  | MSRB3 | 34.12  | 58.36  | 36.84  | 33.44  | 58.22  | 30.24  | 53.32  | 73.96  | 70.66  | 62.92  | 40.20  | 23.75  | 41.59  | 48.00  |
| chr12 | 80603240  | 80603290  | OTOGL | 38.61  | 53.25  | 33.06  | 28.33  | 40.92  | 36.20  | 44.82  | 70.18  | 78.06  | 0.00   | 39.55  | 40.02  | 32.33  | 41.92  |
| chr12 | 80604628  | 80604666  | OTOGL | 37.23  | 62.77  | 45.82  | 42.92  | 44.46  | 42.44  | 76.31  | 77.54  | 78.82  | 0.00   | 32.77  | 46.69  | 35.38  | 48.98  |
| chr12 | 80605730  | 80605777  | OTOGL | 70.71  | 124.56 | 61.52  | 70.27  | 97.81  | 59.60  | 100.29 | 156.46 | 125.42 | 42.77  | 101.15 | 66.40  | 68.04  | 89.75  |
| chr12 | 80611379  | 80611444  | OTOGL | 32.06  | 65.36  | 40.50  | 24.67  | 48.76  | 33.42  | 59.17  | 93.27  | 74.38  | 1.00   | 41.61  | 34.97  | 33.59  | 45.76  |
| chr12 | 80613595  | 80613692  | OTOGL | 50.16  | 105.78 | 84.20  | 56.65  | 72.63  | 56.88  | 123.71 | 149.66 | 125.10 | 5.08   | 63.70  | 72.66  | 66.36  | 80.52  |
| chr12 | 80615872  | 80616025  | OTOGL | 96.92  | 179.84 | 100.03 | 89.99  | 141.45 | 89.63  | 163.74 | 262.06 | 191.74 | 34.53  | 119.18 | 107.42 | 110.32 | 131.38 |
| chr12 | 80623038  | 80623158  | OTOGL | 23.92  | 48.73  | 35.46  | 25.32  | 44.83  | 20.88  | 56.65  | 74.50  | 64.28  | 2.63   | 27.46  | 26.40  | 25.51  | 37.59  |
| chr12 | 80626673  | 80626877  | OTOGL | 80.73  | 126.98 | 57.40  | 59.76  | 112.29 | 63.19  | 99.64  | 192.83 | 133.60 | 19.69  | 92.56  | 74.63  | 85.50  | 92.77  |
| chr12 | 80632632  | 80632758  | OTOGL | 92.53  | 132.29 | 95.65  | 99.57  | 130.48 | 92.31  | 130.73 | 181.57 | 153.09 | 65.28  | 111.47 | 79.58  | 89.43  | 113.71 |
| chr12 | 80633114  | 80633219  | OTOGL | 46.81  | 109.54 | 60.06  | 47.72  | 82.11  | 66.01  | 114.01 | 153.78 | 138.63 | 0.90   | 62.34  | 64.74  | 66.73  | 78.89  |
| chr12 | 80645474  | 80645579  | OTOGL | 35.38  | 66.07  | 31.75  | 30.63  | 48.42  | 36.08  | 72.48  | 105.43 | 71.34  | 7.96   | 46.48  | 40.75  | 37.80  | 49.40  |
| chr12 | 80645857  | 80645981  | OTOGL | 55.27  | 110.05 | 94.10  | 55.76  | 73.02  | 57.30  | 87.98  | 149.06 | 111.24 | 8.84   | 60.63  | 51.02  | 62.86  | 76.19  |
| chr12 | 80647247  | 80647354  | OTOGL | 77.43  | 126.32 | 87.73  | 62.98  | 113.28 | 69.09  | 146.78 | 220.15 | 160.94 | 23.68  | 79.69  | 84.88  | 81.92  | 104.41 |
| chr12 | 80648305  | 80648350  | OTOGL | 19.80  | 47.61  | 26.33  | 12.11  | 23.50  | 28.37  | 29.00  | 30.52  | 43.43  | 0.00   | 15.98  | 23.98  | 14.33  | 25.05  |
| chr12 | 80648821  | 80648965  | OTOGL | 41.57  | 62.19  | 35.00  | 20.99  | 46.30  | 30.41  | 62.46  | 93.88  | 73.08  | 5.25   | 39.52  | 39.63  | 36.83  | 45.86  |
| chr12 | 80650118  | 80650240  | OTOGL | 54.78  | 96.66  | 67.66  | 71.76  | 77.65  | 51.56  | 102.27 | 165.50 | 141.00 | 10.89  | 82.48  | 67.76  | 71.23  | 82.50  |
| chr12 | 80651606  | 80651782  | OTOGL | 26.65  | 56.12  | 33.41  | 40.93  | 45.72  | 32.15  | 57.87  | 84.97  | 51.56  | 0.29   | 31.55  | 30.90  | 38.70  | 41.01  |
| chr12 | 80655750  | 80655873  | OTOGL | 61.52  | 112.33 | 81.66  | 68.99  | 108.52 | 70.31  | 122.06 | 161.59 | 149.16 | 16.44  | 83.49  | 76.19  | 69.59  | 92.69  |
| chr12 | 80658782  | 80658990  | OTOGL | 47.53  | 71.32  | 37.72  | 48.12  | 58.64  | 38.29  | 71.25  | 96.93  | 67.08  | 41.88  | 49.06  | 43.44  | 48.38  | 55.94  |
| chr12 | 80660232  | 80660396  | OTOGL | 33.06  | 47.36  | 23.55  | 22.02  | 35.51  | 22.18  | 53.09  | 65.44  | 60.04  | 26.62  | 29.55  | 33.78  | 34.04  | 37.68  |
| chr12 | 80661034  | 80661107  | OTOGL | 27.49  | 47.16  | 32.26  | 23.69  | 36.30  | 27.15  | 50.76  | 58.28  | 62.15  | 15.50  | 40.70  | 37.46  | 40.59  | 38.24  |
| chr12 | 80663883  | 80663934  | OTOGL | 66.37  | 77.65  | 72.23  | 61.83  | 69.40  | 58.15  | 81.96  | 137.67 | 114.37 | 17.44  | 75.69  | 53.31  | 63.65  | 73.84  |
| chr12 | 80665429  | 80665590  | OTOGL | 65.15  | 108.44 | 58.91  | 60.31  | 95.15  | 55.42  | 106.41 | 138.69 | 112.95 | 38.97  | 64.13  | 67.99  | 71.69  | 81.04  |
| chr12 | 80671949  | 80672055  | OTOGL | 45.42  | 100.85 | 47.51  | 49.00  | 68.64  | 51.32  | 82.05  | 117.17 | 95.27  | 1.00   | 71.24  | 52.14  | 51.87  | 65.13  |
| chr12 | 80672809  | 80672946  | OTOGL |        |        |        |        |        |        |        |        |        |        |        |        |        |        |



|       |           |           |        |        |        |        |        |        |        |        |        |        |        |        |        |        |        |
|-------|-----------|-----------|--------|--------|--------|--------|--------|--------|--------|--------|--------|--------|--------|--------|--------|--------|--------|
| chr12 | 80730578  | 80730600  | OTOGL  | 3.70   | 25.65  | 23.09  | 3.17   | 7.00   | 17.04  | 22.04  | 24.83  | 32.74  | 1.00   | 6.96   | 17.83  | 6.30   | 15.42  |
| chr12 | 80730693  | 80730784  | OTOGL  | 14.15  | 46.09  | 39.64  | 11.57  | 27.55  | 23.09  | 45.97  | 49.11  | 51.95  | 0.00   | 22.25  | 33.14  | 14.97  | 30.37  |
| chr12 | 80732856  | 80733044  | OTOGL  | 73.31  | 133.52 | 109.48 | 76.08  | 99.32  | 92.94  | 128.66 | 172.33 | 171.76 | 11.60  | 104.83 | 84.61  | 77.41  | 104.87 |
| chr12 | 80735729  | 80735942  | OTOGL  | 30.28  | 50.57  | 36.48  | 29.06  | 41.13  | 27.23  | 58.99  | 73.79  | 58.78  | 0.00   | 27.27  | 35.62  | 25.13  | 39.10  |
| chr12 | 80746076  | 80746216  | OTOGL  | 33.30  | 65.88  | 49.42  | 35.96  | 63.01  | 38.71  | 83.50  | 130.93 | 75.97  | 2.42   | 35.45  | 37.82  | 38.05  | 54.36  |
| chr12 | 80747106  | 80747290  | OTOGL  | 76.65  | 110.98 | 55.91  | 50.90  | 88.60  | 56.72  | 89.59  | 155.55 | 111.64 | 31.39  | 79.62  | 69.17  | 74.57  | 81.39  |
| chr12 | 80749517  | 80749728  | OTOGL  | 69.85  | 120.69 | 81.86  | 69.94  | 101.87 | 82.99  | 125.11 | 185.61 | 131.81 | 58.81  | 78.73  | 74.18  | 79.32  | 98.46  |
| chr12 | 80750197  | 80750300  | OTOGL  | 16.41  | 38.50  | 11.36  | 11.13  | 27.84  | 16.38  | 38.40  | 41.08  | 39.97  | 2.90   | 26.09  | 12.60  | 25.77  | 23.55  |
| chr12 | 80750588  | 80750694  | OTOGL  | 73.52  | 149.17 | 94.51  | 72.13  | 86.75  | 61.81  | 140.40 | 170.13 | 162.35 | 4.37   | 87.98  | 89.47  | 78.31  | 99.38  |
| chr12 | 80752029  | 80752129  | OTOGL  | 39.67  | 80.07  | 41.21  | 39.27  | 43.78  | 43.99  | 75.82  | 118.00 | 93.12  | 7.11   | 41.13  | 41.58  | 40.40  | 55.40  |
| chr12 | 80752452  | 80752555  | OTOGL  | 38.39  | 64.52  | 53.46  | 39.08  | 49.87  | 41.48  | 84.14  | 112.37 | 83.61  | 5.01   | 30.72  | 44.13  | 40.95  | 53.90  |
| chr12 | 80752641  | 80752680  | OTOGL  | 13.00  | 15.33  | 16.23  | 7.53   | 7.63   | 7.98   | 22.65  | 13.90  | 26.33  | 1.00   | 2.48   | 11.08  | 6.50   | 12.09  |
| chr12 | 80760355  | 80760417  | OTOGL  | 18.78  | 35.57  | 21.17  | 13.46  | 22.73  | 31.21  | 29.22  | 39.08  | 39.38  | 0.00   | 22.49  | 21.71  | 23.95  | 24.57  |
| chr12 | 80761342  | 80761519  | OTOGL  | 20.85  | 35.82  | 25.65  | 14.12  | 19.96  | 20.79  | 47.33  | 42.52  | 31.05  | 0.00   | 12.88  | 17.89  | 19.20  | 24.07  |
| chr12 | 80761986  | 80762089  | OTOGL  | 75.22  | 130.17 | 88.86  | 81.94  | 106.72 | 87.69  | 139.68 | 205.94 | 119.10 | 29.01  | 90.84  | 99.05  | 68.94  | 104.52 |
| chr12 | 80764351  | 80764469  | OTOGL  | 26.37  | 33.12  | 27.92  | 17.13  | 21.52  | 23.05  | 46.45  | 59.62  | 51.76  | 0.00   | 35.77  | 19.77  | 18.95  | 30.21  |
| chr12 | 80765800  | 80765844  | OTOGL  | 31.02  | 54.67  | 41.93  | 25.16  | 30.09  | 27.44  | 50.33  | 56.67  | 67.49  | 0.00   | 31.22  | 36.93  | 20.40  | 37.75  |
| chr12 | 80770904  | 80770982  | OTOGL  | 32.53  | 47.25  | 38.70  | 34.80  | 32.82  | 34.29  | 53.08  | 63.38  | 60.67  | 0.00   | 42.94  | 30.41  | 43.59  | 39.24  |
| chr12 | 80771629  | 80771828  | OTOGL  | 63.58  | 92.79  | 78.04  | 53.72  | 92.40  | 60.50  | 111.21 | 161.14 | 108.21 | 17.83  | 67.37  | 71.94  | 76.64  | 81.56  |
| chr12 | 122692929 | 122693124 | DIABLO | 50.42  | 49.59  | 54.94  | 54.35  | 110.68 | 42.64  | 63.89  | 106.08 | 70.95  | 125.84 | 52.97  | 41.45  | 62.17  | 68.65  |
| chr12 | 122701036 | 122701131 | DIABLO | 121.33 | 220.81 | 145.31 | 119.54 | 196.23 | 133.72 | 237.97 | 281.57 | 275.94 | 55.96  | 139.71 | 158.02 | 122.40 | 173.84 |
| chr12 | 122701307 | 122701416 | DIABLO | 76.88  | 139.39 | 65.43  | 69.85  | 96.67  | 82.85  | 148.58 | 206.02 | 152.35 | 3.43   | 89.56  | 90.95  | 78.87  | 101.83 |
| chr12 | 122702814 | 122702944 | DIABLO | 100.58 | 153.67 | 113.94 | 95.24  | 129.41 | 94.02  | 159.26 | 260.16 | 169.57 | 11.74  | 115.62 | 90.02  | 120.92 | 124.44 |
| chr12 | 122709060 | 122709295 | DIABLO | 124.01 | 153.44 | 110.28 | 130.06 | 191.70 | 110.75 | 172.27 | 256.48 | 222.71 | 186.89 | 144.98 | 103.96 | 139.78 | 158.96 |
| chr12 | 122710513 | 122711200 | DIABLO | 8.75   | 10.90  | 6.47   | 9.87   | 16.49  | 5.91   | 9.42   | 12.38  | 8.72   | 22.23  | 8.07   | 5.57   | 9.45   | 10.40  |
| chr12 | 133195404 | 133195575 | P2RX2  | 55.31  | 76.02  | 39.38  | 48.49  | 75.23  | 53.60  | 55.32  | 72.15  | 79.63  | 121.35 | 61.99  | 49.29  | 74.03  | 65.65  |
| chr12 | 133196026 | 133196160 | P2RX2  | 70.53  | 118.26 | 72.36  | 91.36  | 140.72 | 86.34  | 108.46 | 119.74 | 141.56 | 218.50 | 84.58  | 68.25  | 109.67 | 110.05 |
| chr12 | 133196266 | 133196336 | P2RX2  | 89.93  | 110.97 | 81.54  | 97.96  | 192.39 | 111.01 | 104.27 | 184.35 | 143.45 | 229.56 | 93.96  | 78.11  | 137.82 | 126.46 |
| chr12 | 133196431 | 133196505 | P2RX2  | 74.64  | 86.19  | 49.49  | 63.53  | 124.01 | 60.29  | 85.89  | 113.91 | 102.47 | 160.47 | 60.57  | 50.84  | 86.21  | 86.03  |
| chr12 | 133196587 | 133196682 | P2RX2  | 18.60  | 25.86  | 19.38  | 17.64  | 40.06  | 16.61  | 15.77  | 25.75  | 24.98  | 55.54  | 17.08  | 11.63  | 23.30  | 24.08  |
| chr12 | 133196854 | 133196933 | P2RX2  | 56.84  | 84.74  | 61.48  | 62.68  | 103.43 | 68.86  | 73.73  | 131.31 | 91.80  | 153.19 | 88.39  | 56.96  | 76.64  | 86.12  |
| chr12 | 133197032 | 133197174 | P2RX2  | 56.99  | 58.71  | 56.52  | 61.57  | 93.66  | 41.47  | 67.66  | 89.73  | 73.63  | 151.22 | 62.43  | 46.42  | 59.64  | 71.67  |
| chr12 | 133197588 | 133197717 | P2RX2  | 55.92  | 70.45  | 45.20  | 70.32  | 121.88 | 62.59  | 77.15  | 112.95 | 86.05  | 169.53 | 73.37  | 45.12  | 80.29  | 82.55  |
| chr12 | 133197842 | 133197950 | P2RX2  | 85.34  | 126.25 | 108.33 | 115.14 | 173.85 | 97.36  | 153.80 | 218.91 | 150.45 | 256.06 | 103.59 | 95.54  | 106.33 | 140.38 |
| chr12 | 133198062 | 133198558 | P2RX2  | 49.90  | 71.93  | 52.84  | 73.68  | 108.16 | 58.03  | 82.98  | 113.48 | 91.40  | 174.65 | 73.47  | 56.96  | 78.79  | 83.96  |
| chr13 | 20763041  | 20763742  | GJB2   | 75.32  | 96.49  | 67.91  | 73.96  | 114.48 | 64.51  | 93.74  | 157.98 | 106.42 | 149.84 | 87.52  | 61.26  | 83.12  | 95.79  |
| chr14 | 31344123  | 31344178  | COCH   | 69.57  | 69.16  | 38.04  | 79.30  | 114.71 | 53.48  | 48.16  | 87.04  | 87.79  | 174.46 | 70.79  | 42.32  | 73.64  | 77.90  |
| chr14 | 31344263  | 31344309  | COCH   | 27.87  | 33.51  | 22.43  | 42.94  | 62.77  | 25.21  | 33.85  | 48.06  | 53.45  | 83.17  | 27.91  | 32.94  | 39.06  | 41.18  |
| chr14 | 31346779  | 31346934  | COCH   | 46.32  | 69.01  | 47.45  | 37.33  | 71.17  | 53.42  | 80.85  | 112.75 | 74.93  | 20.79  | 55.14  | 48.53  | 47.69  | 59.81  |
| chr14 | 31348018  | 31348150  | COCH   | 29.24  | 39.33  | 23.28  | 22.64  | 35.35  | 18.65  | 35.57  | 58.42  | 53.06  | 9.00   | 33.24  | 24.50  | 29.59  | 31.86  |
| chr14 | 31348630  | 31348691  | COCH   | 96.82  | 120.00 | 83.58  | 87.69  | 107.47 | 95.55  | 114.60 | 171.16 | 162.74 | 18.84  | 110.87 | 82.50  | 84.37  | 104.32 |
| chr14 | 31349659  | 31349702  | COCH   | 52.68  | 82.89  | 43.14  | 46.95  | 55.50  | 46.61  | 94.52  | 118.18 | 88.43  | 22.11  | 53.52  | 43.00  | 61.39  | 62.30  |
| chr14 | 31349794  | 31349940  | COCH   | 80.63  | 134.29 | 81.39  | 77.00  | 107.03 | 76.95  | 109.52 | 177.92 | 152.02 | 80.36  | 90.14  | 78.68  | 104.24 | 103.83 |
| chr14 | 31353760  | 31353862  | COCH   | 64.84  | 95.94  | 62.62  | 62.60  | 93.09  | 52.72  | 117.38 | 136.62 | 101.52 | 3.83   | 78.18  | 61.19  | 71.27  | 77.55  |
| chr14 | 31354601  | 31354826  | COCH   | 97.87  | 157.78 | 101.58 | 90.64  | 137.28 | 87.89  | 145.31 | 242.81 | 171.43 | 111.97 | 121.25 | 84.25  | 101.93 | 129.17 |
| chr14 | 31355003  | 31355518  | COCH   | 110.63 | 174.37 | 122.70 | 121.53 | 154.48 | 113.24 | 186.58 | 290.76 | 199.03 | 100.92 | 126.84 | 121.59 | 122.51 | 151.89 |
| chr14 | 31358823  | 31358997  | COCH   | 61.74  | 88.49  | 56.58  | 61.29  | 92.25  | 51.40  | 105.09 | 151.14 | 118.98 | 3.42   | 59.47  | 56.10  | 58.30  | 75.49  |
| chr14 | 76870740  | 76870802  | ESRRB  | 0.00   | 0.00   | 0.00   | 1.00   | 0.00   | 0.00   | 0.00   | 0.14   | 0.00   | 0.00   | 0.70   | 0.00   | 2.00   | 0.15   |
| chr14 | 76873887  | 76873939  | ESRRB  | 0.00   | 0.00   | 1.40   | 1.00   | 1.00   | 0.79   | 0.19   | 0.00   | 0.00   | 0.00   | 0.00   | 1.00   | 0.00   | 0.45   |
| chr14 | 76905685  | 76906093  | ESRRB  | 61.94  | 84.33  | 55.54  | 88.07  | 143.40 | 75.50  | 77.12  | 122.12 | 87.49  | 169.91 | 70.00  | 54.18  | 83.31  | 90.80  |
| chr14 | 76928889  | 76929004  | ESRRB  | 56.07  | 62.66  | 47.95  | 49.93  | 90.16  | 45.06  | 62.69  | 71.00  | 60.11  | 129.54 | 61.06  | 39.76  | 71.07  | 64.67  |
| chr14 | 76948360  | 76948469  | ESRRB  | 64.66  | 90.48  | 69.51  | 80.86  | 111.85 | 79.05  | 108.13 | 134.84 | 130.91 | 196.97 | 90.60  | 63.84  | 80.85  | 101.81 |
| chr14 | 76948942  | 76949102  | ESRRB  | 31.06  | 40.55  | 21.76  | 31.40  | 42.19  | 20.73  | 41.80  | 53.60  | 52.01  | 78.13  | 37.07  | 26.30  | 43.75  | 39.72  |
| chr14 | 76957791  | 76958059  | ESRRB  | 15.12  | 15.96  | 17.83  | 22.62  | 40.00  | 14.32  | 19.54  | 24.38  | 25.51  | 50.24  | 22.54  | 8.53   | 21.79  | 23.05  |
| chr14 | 76964558  | 76964795  | ESRRB  | 61.49  | 93.80  | 47.40  | 72.17  | 115.81 | 58.95  | 94.14  | 125.01 | 99.85  | 182.63 | 67.20  | 46.17  | 76.58  | 88.72  |
| chr14 | 76966207  | 76966409  | ESRRB  | 31.85  | 43.47  | 31.99  | 36.05  | 53.55  | 31.09  | 51.72  | 42.87  | 49.04  | 64.55  | 41.45  | 28.06  | 48.41  | 42.14  |
| chr14 | 76967039  | 76967064  | ESRRB  | 82.62  | 113.62 | 88.23  | 116.04 | 145.04 | 99.15  | 121.38 | 201.77 | 148.42 | 200.85 | 105.54 | 96.00  | 129.12 | 126.55 |
| chr15 | 43891871  | 43891958  | STRC   | 0.00   | 0.00   | 0.00   | 0.13   | 0.00   | 0.28   | 0.01   | 0.06   | 0.00   | 0.00   | 0.00   | 0.05   | 0.00   | 0.04   |
| chr15 | 43892159  | 43892305  | STRC   | 64.84  | 84.63  | 55.95  | 77.69  | 141.34 | 61.48  | 73.57  | 132.91 | 114.69 | 156.22 | 106.73 | 54.90  | 83.56  | 93.75  |
| chr15 | 43892395  | 43892491  | STRC   | 19.27  | 22.92  | 21.85  | 12.97  | 31.41  | 16.21  | 20.75  | 32.38  | 36.57  | 42.73  | 22.79  | 17.33  | 22.38  | 24.76  |
| chr15 | 43892733  | 43892880  | STRC   | 31.84  | 32.41  | 18.97  | 34.15  | 56.66  | 19.85  | 38.55  | 54.47  | 54.64  | 77.22  | 40.83  | 20.33  | 28.28  | 39.99  |
| chr15 | 43893071  | 43893212  | STRC   | 26.24  | 19.75  | 10.82  | 32.06  | 46.15  | 11.77  | 18.12  | 41.80  | 48.21  | 57.07  | 42.73  | 14.33  | 42.65  | 30.75  |
| chr15 | 43893595  | 43893749  | STRC   | 40.22  | 36.90  | 24.94  | 34.44  | 58.04  | 30.19  | 42.48  | 59.90  | 73.09  | 44.94  | 39.15  | 32.57  | 44.02  | 43.07  |
| chr15 | 43895441  | 43895609  | STRC   | 56.62  | 55.57  | 41.76  | 45.40  | 79.05  | 46.31  | 65.75  | 88.73  | 103.68 | 86.06  | 43.64  | 61.99  | 65.99  | 64.55  |
| chr15 | 43896195  | 43896350  | STRC   | 20.09  | 15.70  | 8.46   | 14.96  | 26.42  | 9.29   | 17.63  | 21.47  | 29.55  | 37.35  | 20.94  | 14.63  | 22.69  | 19.71  |
| chr15 | 43896560  | 43896649  | STRC   | 22.47  | 26.27  | 25.34  | 28.07  |        |        |        |        |        |        |        |        |        |        |

|       |          |          |         |        |        |        |        |        |        |        |        |        |        |        |        |        |        |
|-------|----------|----------|---------|--------|--------|--------|--------|--------|--------|--------|--------|--------|--------|--------|--------|--------|--------|
| chr15 | 43906395 | 43906510 | STRC    | 0.26   | 0.47   | 0.31   | 0.27   | 0.34   | 0.66   | 0.72   | 0.88   | 1.99   | 0.00   | 0.37   | 0.10   | 0.00   | 0.53   |
| chr15 | 43906613 | 43906674 | STRC    | 8.94   | 6.29   | 0.00   | 10.77  | 6.10   | 5.82   | 8.29   | 24.81  | 6.02   | 6.53   | 8.56   | 5.79   | 9.42   | 8.16   |
| chr15 | 43907632 | 43908888 | STRC    | 0.00   | 0.00   | 0.00   | 0.00   | 0.00   | 0.00   | 0.02   | 0.00   | 0.00   | 0.00   | 0.02   | 0.00   | 0.00   | 0.00   |
| chr15 | 43909657 | 43909680 | STRC    | 0.00   | 0.00   | 0.00   | 0.00   | 0.00   | 0.00   | 0.00   | 0.00   | 0.00   | 0.00   | 0.00   | 0.00   | 0.00   | 0.00   |
| chr15 | 43909770 | 43910554 | STRC    | 24.52  | 30.14  | 22.23  | 31.72  | 42.69  | 23.49  | 27.28  | 40.15  | 32.88  | 73.25  | 33.64  | 18.52  | 31.80  | 33.38  |
| chr15 | 43910858 | 43910920 | STRC    | 0.00   | 0.00   | 0.00   | 0.00   | 0.00   | 0.00   | 0.00   | 0.00   | 0.00   | 0.00   | 0.00   | 0.00   | 0.00   | 0.00   |
| chr15 | 78397654 | 78397674 | CIB2    | 46.19  | 33.62  | 38.62  | 37.29  | 62.33  | 25.90  | 54.71  | 60.86  | 53.48  | 105.14 | 46.05  | 36.10  | 50.48  | 50.02  |
| chr15 | 78398082 | 78398276 | CIB2    | 119.21 | 138.77 | 100.04 | 127.44 | 208.58 | 107.35 | 147.64 | 199.96 | 160.09 | 282.90 | 152.93 | 105.96 | 149.11 | 154.24 |
| chr15 | 78401578 | 78401851 | CIB2    | 72.48  | 85.12  | 67.91  | 67.87  | 107.47 | 61.44  | 106.90 | 118.64 | 101.89 | 150.75 | 82.16  | 55.93  | 92.00  | 89.88  |
| chr15 | 78403508 | 78403618 | CIB2    | 56.97  | 66.70  | 43.27  | 53.86  | 93.56  | 45.79  | 60.59  | 79.07  | 87.22  | 134.27 | 75.67  | 39.13  | 69.07  | 69.67  |
| chr15 | 78416048 | 78416081 | CIB2    | 35.65  | 26.21  | 19.18  | 36.85  | 37.91  | 27.88  | 30.18  | 45.82  | 32.82  | 60.47  | 33.65  | 18.91  | 29.12  | 33.79  |
| chr15 | 78423508 | 78423877 | CIB2    | 44.48  | 72.38  | 45.79  | 24.84  | 60.03  | 48.81  | 68.55  | 67.33  | 75.38  | 63.68  | 44.38  | 48.57  | 57.72  | 55.35  |
| chr15 | 83518468 | 83518655 | HOMER2  | 40.37  | 60.49  | 37.13  | 56.20  | 87.96  | 39.26  | 66.87  | 89.37  | 70.41  | 89.31  | 59.03  | 33.98  | 55.65  | 60.87  |
| chr15 | 83519904 | 83519983 | HOMER2  | 41.01  | 79.41  | 47.51  | 45.38  | 82.44  | 44.51  | 67.34  | 117.30 | 93.30  | 43.58  | 44.08  | 49.06  | 61.16  | 62.91  |
| chr15 | 83520895 | 83521004 | HOMER2  | 60.80  | 90.65  | 56.53  | 68.88  | 93.49  | 53.22  | 96.90  | 125.33 | 94.19  | 57.35  | 75.23  | 66.63  | 78.98  | 78.27  |
| chr15 | 83523397 | 83523552 | HOMER2  | 29.56  | 35.93  | 22.46  | 33.77  | 61.74  | 31.81  | 33.47  | 47.19  | 43.22  | 105.72 | 35.73  | 34.01  | 47.33  | 42.88  |
| chr15 | 83527782 | 83527920 | HOMER2  | 48.76  | 56.07  | 29.29  | 42.00  | 60.80  | 48.98  | 52.13  | 74.51  | 73.32  | 85.35  | 48.52  | 39.68  | 57.05  | 54.95  |
| chr15 | 83532920 | 83533011 | HOMER2  | 111.36 | 189.09 | 119.04 | 105.73 | 145.85 | 117.73 | 214.55 | 285.37 | 226.30 | 34.16  | 132.26 | 133.35 | 108.83 | 151.23 |
| chr15 | 83544026 | 83544156 | HOMER2  | 23.98  | 27.23  | 14.53  | 23.44  | 28.52  | 17.59  | 33.79  | 46.37  | 39.44  | 37.62  | 30.37  | 21.61  | 26.18  | 28.71  |
| chr15 | 83561438 | 83561593 | HOMER2  | 101.97 | 132.29 | 91.14  | 113.89 | 163.87 | 101.08 | 126.85 | 205.99 | 154.15 | 216.51 | 126.79 | 69.87  | 142.96 | 133.70 |
| chr15 | 83621284 | 83621287 | HOMER2  | 5.00   | 3.00   | 8.00   | 15.00  | 9.25   | 8.00   | 5.00   | 6.00   | 12.50  | 15.25  | 6.00   | 4.00   | 6.00   | 8.08   |
| chr16 | 2546036  | 2547114  | TBC1D24 | 63.12  | 74.19  | 55.05  | 76.43  | 123.13 | 63.08  | 87.92  | 118.07 | 85.57  | 186.57 | 72.34  | 51.36  | 89.69  | 88.07  |
| chr16 | 2547712  | 2547728  | TBC1D24 | 85.00  | 123.94 | 88.65  | 69.06  | 136.06 | 79.71  | 149.82 | 197.59 | 164.59 | 128.88 | 121.53 | 68.24  | 93.06  | 117.75 |
| chr16 | 2548240  | 2548397  | TBC1D24 | 38.19  | 31.96  | 34.11  | 48.01  | 69.12  | 22.78  | 45.85  | 66.08  | 55.25  | 104.89 | 40.13  | 23.04  | 37.18  | 48.29  |
| chr16 | 2549359  | 2549421  | TBC1D24 | 55.10  | 45.06  | 42.70  | 52.83  | 99.16  | 40.46  | 62.79  | 84.56  | 65.95  | 111.43 | 47.21  | 40.44  | 68.16  | 62.31  |
| chr16 | 2549837  | 2549931  | TBC1D24 | 83.98  | 120.56 | 77.96  | 129.55 | 171.95 | 69.62  | 116.17 | 170.33 | 105.31 | 251.63 | 89.97  | 73.48  | 114.03 | 121.71 |
| chr16 | 2550270  | 2550491  | TBC1D24 | 28.36  | 22.23  | 10.71  | 27.62  | 40.16  | 17.26  | 22.73  | 26.13  | 33.58  | 41.15  | 19.98  | 15.87  | 25.09  | 25.48  |
| chr16 | 2550806  | 2550959  | TBC1D24 | 94.99  | 114.04 | 85.33  | 127.34 | 204.57 | 98.71  | 127.83 | 182.79 | 128.49 | 278.58 | 114.88 | 97.12  | 126.44 | 137.89 |
| chr16 | 21689837 | 21689926 | OTOA    | 36.72  | 61.43  | 38.57  | 54.80  | 59.22  | 47.64  | 58.21  | 125.04 | 91.37  | 20.84  | 53.33  | 40.72  | 48.22  | 57.33  |
| chr16 | 21690237 | 21690264 | OTOA    | 27.93  | 69.57  | 42.18  | 24.50  | 38.82  | 35.79  | 51.93  | 103.43 | 70.89  | 0.00   | 29.50  | 44.00  | 28.14  | 44.88  |
| chr16 | 21690358 | 21690387 | OTOA    | 38.33  | 86.70  | 60.37  | 45.03  | 69.87  | 51.37  | 98.93  | 155.00 | 109.03 | 0.00   | 61.50  | 56.93  | 51.90  | 69.42  |
| chr16 | 21690506 | 21690532 | OTOA    | 45.59  | 87.19  | 47.19  | 47.00  | 51.44  | 41.33  | 87.78  | 91.07  | 88.67  | 0.00   | 42.33  | 50.59  | 54.81  | 56.68  |
| chr16 | 21693060 | 21693146 | OTOA    | 49.09  | 62.33  | 37.47  | 49.31  | 73.59  | 50.00  | 64.70  | 102.51 | 81.15  | 80.75  | 52.46  | 37.09  | 54.46  | 61.70  |
| chr16 | 21695845 | 21695873 | OTOA    | 39.72  | 49.14  | 22.17  | 47.00  | 44.10  | 28.38  | 41.03  | 64.24  | 51.21  | 74.79  | 41.14  | 26.52  | 32.17  | 44.12  |
| chr16 | 21696552 | 21696682 | OTOA    | 32.13  | 59.26  | 27.69  | 43.09  | 73.83  | 41.40  | 41.00  | 63.85  | 70.13  | 88.86  | 52.83  | 34.16  | 54.26  | 52.35  |
| chr16 | 21698735 | 21698969 | OTOA    | 37.42  | 52.04  | 39.60  | 39.95  | 65.74  | 45.82  | 55.08  | 72.31  | 62.46  | 70.82  | 43.72  | 34.20  | 46.14  | 51.60  |
| chr16 | 21702906 | 21703008 | OTOA    | 44.18  | 61.25  | 44.29  | 57.70  | 69.59  | 31.57  | 75.78  | 90.91  | 68.75  | 51.19  | 59.66  | 39.11  | 52.64  | 57.83  |
| chr16 | 21709097 | 21709196 | OTOA    | 55.63  | 116.89 | 61.45  | 56.68  | 90.00  | 48.78  | 115.71 | 164.48 | 135.62 | 20.92  | 80.87  | 65.15  | 70.91  | 84.35  |
| chr16 | 21712210 | 21712348 | OTOA    | 25.83  | 48.20  | 38.04  | 36.33  | 51.91  | 34.08  | 47.27  | 68.94  | 55.26  | 64.28  | 41.02  | 36.50  | 49.23  | 45.64  |
| chr16 | 21716352 | 21716358 | OTOA    | 6.29   | 9.00   | 16.00  | 10.71  | 6.71   | 19.86  | 6.00   | 11.00  | 9.14   | 3.00   | 6.43   | 9.00   | 5.00   | 9.43   |
| chr16 | 21716491 | 21716613 | OTOA    | 21.89  | 29.38  | 21.92  | 34.82  | 42.59  | 27.64  | 44.20  | 59.34  | 42.59  | 72.46  | 33.20  | 18.28  | 36.67  | 37.36  |
| chr16 | 21721210 | 21721424 | OTOA    | 29.78  | 44.82  | 37.80  | 34.17  | 62.41  | 38.69  | 34.51  | 67.87  | 62.77  | 87.54  | 48.21  | 31.86  | 53.56  | 48.37  |
| chr16 | 21726307 | 21726473 | OTOA    | 47.29  | 50.79  | 34.19  | 62.02  | 81.81  | 46.02  | 59.11  | 96.84  | 80.65  | 120.13 | 58.60  | 36.74  | 47.49  | 64.52  |
| chr16 | 21728229 | 21728368 | OTOA    | 39.49  | 61.96  | 40.28  | 42.79  | 80.59  | 33.52  | 67.34  | 108.56 | 66.41  | 13.48  | 55.05  | 40.14  | 55.59  | 54.13  |
| chr16 | 21730455 | 21730512 | OTOA    | 18.83  | 33.64  | 24.64  | 12.03  | 35.62  | 16.81  | 19.93  | 45.59  | 31.90  | 23.43  | 21.19  | 11.00  | 29.12  | 24.55  |
| chr16 | 21730709 | 21730825 | OTOA    | 56.60  | 93.11  | 63.79  | 72.29  | 92.55  | 52.83  | 96.26  | 141.72 | 122.59 | 101.15 | 72.40  | 53.75  | 64.46  | 84.92  |
| chr16 | 21734227 | 21734299 | OTOA    | 106.21 | 172.96 | 107.99 | 113.55 | 137.05 | 106.55 | 164.30 | 253.51 | 175.59 | 79.33  | 111.82 | 106.19 | 122.19 | 136.25 |
| chr16 | 21737845 | 21737979 | OTOA    | 38.64  | 33.82  | 28.19  | 36.31  | 45.68  | 21.13  | 49.97  | 48.94  | 46.31  | 61.14  | 48.44  | 30.42  | 48.64  | 40.75  |
| chr16 | 21739563 | 21739752 | OTOA    | 58.50  | 83.54  | 42.71  | 79.39  | 98.10  | 61.05  | 105.22 | 117.91 | 81.44  | 174.41 | 91.40  | 61.69  | 78.19  | 87.95  |
| chr16 | 21742159 | 21742251 | OTOA    | 60.59  | 101.86 | 60.80  | 51.65  | 82.20  | 62.19  | 98.95  | 152.27 | 91.81  | 77.17  | 64.90  | 83.72  | 34.68  | 82.34  |
| chr16 | 21747583 | 21747711 | OTOA    | 58.56  | 93.05  | 52.81  | 62.16  | 111.88 | 57.87  | 77.69  | 162.72 | 100.12 | 58.57  | 90.05  | 56.42  | 83.05  | 81.83  |
| chr16 | 21752043 | 21752229 | OTOA    | 0.00   | 0.00   | 0.00   | 0.00   | 0.00   | 0.00   | 0.00   | 0.00   | 0.00   | 0.00   | 0.00   | 0.00   | 0.00   | 0.00   |
| chr16 | 21756203 | 21756357 | OTOA    | 0.00   | 0.00   | 0.00   | 0.00   | 0.00   | 0.00   | 0.00   | 0.00   | 0.00   | 0.00   | 0.00   | 0.00   | 0.00   | 0.00   |
| chr16 | 21763257 | 21763398 | OTOA    | 0.00   | 0.00   | 0.00   | 0.00   | 0.00   | 0.00   | 0.61   | 0.00   | 0.59   | 0.00   | 0.02   | 0.00   | 2.08   | 0.10   |
| chr16 | 21763691 | 21763826 | OTOA    | 6.66   | 6.10   | 3.25   | 7.84   | 2.71   | 2.84   | 15.96  | 12.60  | 8.13   | 15.40  | 3.24   | 2.18   | 0.67   | 7.24   |
| chr16 | 21764349 | 21764445 | OTOA    | 48.42  | 44.38  | 48.91  | 48.16  | 13.89  | 45.94  | 71.32  | 44.31  | 18.92  | 32.88  | 45.05  | 29.88  | 11.24  | 41.00  |
| chr16 | 21768404 | 21768598 | OTOA    | 0.18   | 0.00   | 0.00   | 0.34   | 0.14   | 0.15   | 0.34   | 0.00   | 0.26   | 0.00   | 0.00   | 0.61   | 0.00   | 0.17   |
| chr16 | 21771792 | 21771861 | OTOA    | 41.39  | 37.89  | 39.21  | 34.47  | 30.34  | 30.30  | 65.80  | 59.80  | 36.56  | 84.86  | 36.83  | 30.59  | 34.09  | 44.00  |
| chr16 | 75661794 | 75661891 | KARS    | 86.92  | 104.14 | 82.59  | 89.84  | 129.37 | 77.39  | 127.40 | 161.51 | 121.20 | 27.03  | 81.11  | 86.39  | 86.43  | 97.91  |
| chr16 | 75662468 | 75662610 | KARS    | 28.08  | 39.44  | 26.98  | 23.64  | 35.48  | 18.66  | 37.56  | 44.67  | 40.66  | 32.44  | 26.95  | 20.48  | 30.08  | 31.25  |
| chr16 | 75663314 | 75663439 | KARS    | 39.38  | 49.21  | 31.42  | 41.16  | 63.67  | 40.44  | 59.46  | 93.87  | 59.56  | 67.37  | 52.14  | 30.40  | 59.53  | 52.34  |
| chr16 | 75664322 | 75664406 | KARS    | 38.13  | 63.09  | 35.95  | 40.07  | 51.09  | 43.48  | 55.40  | 77.76  | 61.18  | 32.80  | 55.24  | 39.71  | 43.29  | 49.49  |
| chr16 | 75665067 | 75665151 | KARS    | 37.98  | 48.07  | 37.04  | 36.89  | 55.48  | 32.39  | 59.07  | 58.02  | 49.47  | 60.91  | 55.19  | 30.24  | 50.41  | 46.73  |
| chr16 | 75665315 | 75665487 | KARS    | 82.69  | 121.49 | 69.93  | 90.02  | 110.17 | 72.38  | 123.17 | 191.98 | 122.18 | 145.82 | 88.24  | 78.29  | 86.79  | 108.03 |
| chr16 | 75665592 | 75665753 | KARS    | 46.59  | 59.68  | 41.11  | 61.00  | 69.08  | 49.78  | 72.44  | 110.20 | 88.66  | 89.47  | 57.35  | 41.53  | 67.59  | 65.57  |
| chr16 | 75668072 | 75668190 | KARS    | 27.66  | 49.04  | 46.01  | 29.98  | 64.29  | 32.29  | 59.78  | 82.07  | 75.01  | 6.08   | 41.15  | 36.80  | 39.83  | 45.85  |
| chr16 | 75669579 | 75669703 | KARS    | 45.78  | 66.56  | 50.39  | 54.77  | 61.55  |        |        |        |        |        |        |        |        |        |

|       |          |          |        |        |        |        |        |        |        |        |        |        |        |        |        |        |        |
|-------|----------|----------|--------|--------|--------|--------|--------|--------|--------|--------|--------|--------|--------|--------|--------|--------|--------|
| chr17 | 18034783 | 18034845 | MYO15A | 32.97  | 48.95  | 36.73  | 33.68  | 56.57  | 31.37  | 40.24  | 39.92  | 47.78  | 73.16  | 38.41  | 24.70  | 34.46  | 42.04  |
| chr17 | 18035768 | 18035880 | MYO15A | 45.28  | 75.12  | 60.93  | 51.31  | 107.97 | 51.00  | 64.50  | 117.28 | 76.38  | 148.92 | 64.96  | 41.97  | 70.19  | 75.47  |
| chr17 | 18036540 | 18036700 | MYO15A | 38.17  | 40.84  | 28.10  | 34.30  | 67.20  | 31.80  | 39.20  | 62.84  | 42.58  | 76.32  | 42.26  | 24.53  | 40.16  | 44.01  |
| chr17 | 18039026 | 18039138 | MYO15A | 32.91  | 46.31  | 30.58  | 36.90  | 47.49  | 23.34  | 40.61  | 44.69  | 38.53  | 67.44  | 35.85  | 24.11  | 36.96  | 39.06  |
| chr17 | 18039732 | 18039789 | MYO15A | 99.38  | 115.86 | 95.71  | 110.60 | 186.76 | 108.84 | 122.52 | 166.95 | 156.97 | 260.10 | 121.50 | 89.50  | 129.28 | 136.22 |
| chr17 | 18039878 | 18040000 | MYO15A | 38.25  | 79.47  | 65.24  | 66.67  | 107.03 | 53.35  | 70.89  | 119.95 | 94.05  | 149.27 | 65.85  | 62.67  | 74.11  | 81.06  |
| chr17 | 18040899 | 18040993 | MYO15A | 18.42  | 27.27  | 22.43  | 22.07  | 30.77  | 17.27  | 24.89  | 36.20  | 34.12  | 34.09  | 22.61  | 15.51  | 24.73  | 25.47  |
| chr17 | 18041430 | 18041560 | MYO15A | 61.53  | 65.60  | 58.15  | 74.78  | 117.06 | 53.75  | 76.09  | 141.87 | 80.05  | 138.73 | 71.83  | 46.65  | 87.39  | 82.17  |
| chr17 | 18042126 | 18042250 | MYO15A | 40.03  | 29.11  | 20.02  | 37.44  | 59.32  | 30.44  | 30.85  | 49.92  | 42.90  | 78.96  | 36.95  | 23.82  | 44.13  | 39.98  |
| chr17 | 18042849 | 18042925 | MYO15A | 46.16  | 53.60  | 46.38  | 53.47  | 81.14  | 47.13  | 60.13  | 84.10  | 66.17  | 110.92 | 55.04  | 41.03  | 60.47  | 62.10  |
| chr17 | 18043832 | 18043979 | MYO15A | 47.05  | 68.25  | 49.01  | 70.98  | 123.84 | 59.24  | 83.34  | 94.29  | 91.49  | 160.57 | 69.11  | 52.00  | 78.68  | 80.76  |
| chr17 | 18044102 | 18044146 | MYO15A | 43.16  | 41.47  | 43.04  | 46.42  | 90.56  | 42.80  | 66.69  | 80.18  | 73.04  | 122.87 | 57.49  | 38.84  | 49.02  | 62.21  |
| chr17 | 18044334 | 18044457 | MYO15A | 30.77  | 40.25  | 40.66  | 38.83  | 67.44  | 34.64  | 47.72  | 69.90  | 47.19  | 75.06  | 55.24  | 37.31  | 40.85  | 48.75  |
| chr17 | 18044968 | 18045084 | MYO15A | 70.11  | 61.46  | 45.44  | 63.61  | 99.61  | 44.97  | 86.67  | 101.12 | 68.78  | 145.77 | 65.08  | 54.99  | 70.63  | 75.63  |
| chr17 | 18045394 | 18045568 | MYO15A | 30.26  | 17.70  | 11.13  | 25.76  | 42.09  | 13.79  | 26.82  | 34.49  | 25.35  | 37.54  | 27.63  | 14.77  | 29.65  | 25.61  |
| chr17 | 18046071 | 18046154 | MYO15A | 27.54  | 36.60  | 25.12  | 37.57  | 37.81  | 32.38  | 47.48  | 43.14  | 39.95  | 112.44 | 37.11  | 32.25  | 46.96  | 42.45  |
| chr17 | 18046881 | 18046933 | MYO15A | 11.55  | 18.75  | 12.40  | 11.85  | 30.17  | 14.83  | 23.47  | 33.92  | 22.68  | 41.75  | 18.96  | 16.62  | 16.23  | 21.41  |
| chr17 | 18047030 | 18047110 | MYO15A | 43.52  | 50.68  | 43.23  | 54.10  | 73.63  | 43.43  | 45.59  | 95.88  | 60.72  | 114.64 | 52.14  | 28.78  | 39.99  | 58.86  |
| chr17 | 18047185 | 18047314 | MYO15A | 34.38  | 38.27  | 37.34  | 45.10  | 62.15  | 37.95  | 53.52  | 76.72  | 57.16  | 83.01  | 51.58  | 26.94  | 49.18  | 50.34  |
| chr17 | 18047812 | 18047906 | MYO15A | 26.39  | 23.71  | 18.01  | 31.05  | 49.25  | 22.81  | 31.59  | 32.57  | 32.49  | 77.72  | 27.80  | 15.92  | 22.98  | 32.44  |
| chr17 | 18049187 | 18049421 | MYO15A | 65.18  | 76.48  | 59.39  | 57.34  | 106.22 | 58.55  | 94.65  | 125.08 | 85.13  | 160.37 | 65.09  | 55.84  | 74.63  | 84.11  |
| chr17 | 18051344 | 18051524 | MYO15A | 73.82  | 73.00  | 45.19  | 71.14  | 112.14 | 51.94  | 82.64  | 109.63 | 83.53  | 173.08 | 63.11  | 46.58  | 80.93  | 82.15  |
| chr17 | 18051811 | 18051882 | MYO15A | 38.08  | 50.89  | 29.26  | 34.92  | 69.67  | 38.83  | 65.63  | 84.19  | 70.46  | 97.10  | 42.22  | 32.68  | 56.54  | 54.49  |
| chr17 | 18052076 | 18052266 | MYO15A | 37.86  | 54.25  | 28.52  | 37.02  | 65.46  | 27.81  | 53.06  | 72.25  | 61.98  | 99.04  | 41.23  | 27.49  | 40.10  | 50.50  |
| chr17 | 18052531 | 18052690 | MYO15A | 50.90  | 57.54  | 45.69  | 40.37  | 58.66  | 33.04  | 58.29  | 83.54  | 58.96  | 87.63  | 49.97  | 36.99  | 55.54  | 55.13  |
| chr17 | 18052801 | 18052894 | MYO15A | 44.88  | 51.44  | 33.47  | 40.36  | 59.01  | 33.48  | 53.36  | 61.33  | 57.44  | 73.03  | 52.84  | 29.09  | 39.28  | 49.14  |
| chr17 | 18053744 | 18053857 | MYO15A | 67.39  | 55.31  | 48.80  | 61.41  | 103.54 | 55.17  | 59.29  | 100.07 | 78.11  | 158.97 | 74.18  | 44.30  | 67.11  | 75.54  |
| chr17 | 18054013 | 18054079 | MYO15A | 17.69  | 23.22  | 13.39  | 33.28  | 38.33  | 15.49  | 14.76  | 31.94  | 17.34  | 50.13  | 19.75  | 17.58  | 23.96  | 24.41  |
| chr17 | 18054151 | 18054227 | MYO15A | 10.99  | 18.90  | 25.69  | 13.53  | 14.44  | 31.66  | 13.53  | 15.99  | 13.12  | 12.43  | 11.39  | 6.96   | 8.53   | 15.72  |
| chr17 | 18054425 | 18054604 | MYO15A | 91.09  | 125.22 | 92.77  | 118.86 | 184.06 | 96.33  | 112.37 | 150.29 | 145.29 | 283.98 | 112.57 | 98.78  | 121.35 | 134.30 |
| chr17 | 18054710 | 18054841 | MYO15A | 78.61  | 89.01  | 82.01  | 91.48  | 146.21 | 66.14  | 112.69 | 152.94 | 100.84 | 186.85 | 111.13 | 87.67  | 85.83  | 108.80 |
| chr17 | 18055161 | 18055265 | MYO15A | 41.09  | 45.88  | 27.30  | 36.08  | 46.12  | 35.89  | 37.19  | 57.73  | 41.74  | 68.36  | 34.58  | 25.47  | 39.50  | 41.45  |
| chr17 | 18055427 | 18055498 | MYO15A | 22.68  | 33.54  | 19.94  | 33.69  | 40.43  | 28.13  | 29.08  | 45.54  | 27.74  | 68.40  | 21.90  | 14.75  | 21.38  | 32.15  |
| chr17 | 18057090 | 18057210 | MYO15A | 57.73  | 60.45  | 61.16  | 71.96  | 97.74  | 49.50  | 48.56  | 72.07  | 61.64  | 165.36 | 64.39  | 35.98  | 50.98  | 70.55  |
| chr17 | 18057446 | 18057504 | MYO15A | 56.80  | 60.54  | 48.32  | 67.95  | 101.25 | 46.98  | 61.90  | 92.90  | 65.76  | 167.10 | 80.93  | 44.19  | 67.05  | 74.55  |
| chr17 | 18057995 | 18058069 | MYO15A | 35.31  | 30.84  | 24.48  | 21.11  | 60.35  | 24.79  | 37.91  | 47.63  | 46.15  | 58.32  | 39.57  | 23.35  | 29.43  | 37.48  |
| chr17 | 18058425 | 18058539 | MYO15A | 70.73  | 86.28  | 71.03  | 78.26  | 126.67 | 50.80  | 91.68  | 94.13  | 105.37 | 171.13 | 69.17  | 58.33  | 90.47  | 89.46  |
| chr17 | 18058629 | 18058746 | MYO15A | 55.69  | 43.96  | 37.68  | 58.89  | 108.73 | 36.24  | 50.20  | 67.51  | 52.88  | 108.18 | 48.78  | 34.53  | 58.18  | 58.61  |
| chr17 | 18059510 | 18059650 | MYO15A | 40.31  | 47.42  | 26.22  | 47.51  | 67.12  | 30.76  | 43.45  | 64.70  | 50.02  | 79.83  | 47.83  | 28.48  | 45.72  | 47.80  |
| chr17 | 18060269 | 18060379 | MYO15A | 31.71  | 39.57  | 28.76  | 30.91  | 80.28  | 37.09  | 38.49  | 56.59  | 48.94  | 95.81  | 39.08  | 33.59  | 38.35  | 46.73  |
| chr17 | 18060471 | 18060544 | MYO15A | 67.54  | 109.34 | 63.50  | 81.47  | 133.65 | 70.46  | 100.81 | 155.04 | 99.46  | 163.32 | 67.22  | 73.31  | 90.24  | 98.76  |
| chr17 | 18061037 | 18061214 | MYO15A | 39.00  | 76.76  | 40.52  | 43.33  | 79.08  | 39.72  | 73.66  | 97.49  | 89.65  | 129.47 | 47.53  | 45.92  | 51.19  | 66.85  |
| chr17 | 18061838 | 18061952 | MYO15A | 153.42 | 206.06 | 141.77 | 162.52 | 262.31 | 139.19 | 228.37 | 305.81 | 239.63 | 421.19 | 176.12 | 132.29 | 186.42 | 214.06 |
| chr17 | 18062240 | 18062311 | MYO15A | 44.36  | 53.00  | 34.79  | 39.53  | 59.93  | 36.94  | 46.60  | 58.01  | 58.79  | 97.63  | 60.69  | 26.18  | 50.29  | 51.37  |
| chr17 | 18062590 | 18062661 | MYO15A | 47.42  | 70.78  | 40.42  | 56.51  | 94.53  | 49.51  | 61.11  | 67.25  | 71.88  | 124.46 | 65.97  | 49.89  | 60.54  | 66.64  |
| chr17 | 18062921 | 18062993 | MYO15A | 48.25  | 52.00  | 41.59  | 40.40  | 51.30  | 37.08  | 38.81  | 93.04  | 69.10  | 76.77  | 43.29  | 24.10  | 41.78  | 51.31  |
| chr17 | 18063250 | 18063331 | MYO15A | 46.38  | 65.22  | 55.98  | 62.07  | 93.62  | 52.91  | 78.71  | 110.61 | 90.12  | 128.48 | 60.88  | 56.10  | 60.48  | 75.09  |
| chr17 | 18064632 | 18064761 | MYO15A | 42.53  | 60.96  | 34.69  | 58.82  | 99.44  | 48.94  | 60.54  | 77.89  | 68.78  | 141.62 | 58.69  | 49.35  | 70.53  | 66.85  |
| chr17 | 18065900 | 18065993 | MYO15A | 52.95  | 40.31  | 34.39  | 68.27  | 96.11  | 42.70  | 50.13  | 76.28  | 57.44  | 155.29 | 65.31  | 37.95  | 66.15  | 64.76  |
| chr17 | 18066559 | 18066635 | MYO15A | 42.71  | 32.19  | 20.65  | 27.97  | 38.86  | 21.99  | 40.13  | 51.64  | 47.21  | 60.70  | 23.47  | 10.05  | 27.83  | 34.80  |
| chr17 | 18067057 | 18067152 | MYO15A | 29.24  | 54.76  | 37.17  | 51.35  | 80.38  | 42.74  | 35.59  | 56.43  | 42.28  | 105.36 | 34.74  | 24.05  | 51.60  | 49.51  |
| chr17 | 18069676 | 18069835 | MYO15A | 58.56  | 63.96  | 43.09  | 47.70  | 99.12  | 50.29  | 61.81  | 105.75 | 69.11  | 132.86 | 62.93  | 38.30  | 52.98  | 69.46  |
| chr17 | 18070905 | 18071037 | MYO15A | 45.73  | 56.22  | 45.90  | 55.38  | 94.35  | 60.98  | 77.45  | 98.30  | 77.17  | 133.16 | 63.13  | 37.90  | 59.00  | 70.47  |
| chr17 | 18074953 | 18075085 | MYO15A | 28.70  | 39.16  | 30.51  | 34.45  | 55.69  | 19.85  | 28.05  | 42.15  | 36.74  | 60.88  | 29.62  | 16.01  | 33.29  | 35.15  |
| chr17 | 18075472 | 18075604 | MYO15A | 42.73  | 44.59  | 34.23  | 55.62  | 67.53  | 46.98  | 43.74  | 72.52  | 61.14  | 97.55  | 56.85  | 39.31  | 51.68  | 55.23  |
| chr17 | 18077096 | 18077235 | MYO15A | 62.15  | 92.12  | 63.45  | 79.82  | 109.80 | 53.54  | 87.47  | 131.06 | 96.31  | 148.87 | 79.87  | 58.58  | 75.00  | 88.59  |
| chr17 | 18082084 | 18082184 | MYO15A | 47.62  | 44.84  | 40.30  | 50.76  | 71.20  | 30.37  | 51.72  | 81.38  | 63.56  | 97.83  | 44.20  | 27.66  | 48.40  | 54.29  |
| chr17 | 79477506 | 79477859 | ACTG1  | 17.86  | 29.41  | 15.90  | 28.89  | 44.19  | 21.90  | 20.10  | 35.70  | 18.86  | 56.82  | 19.41  | 19.56  | 24.03  | 27.38  |
| chr17 | 79477954 | 79478134 | ACTG1  | 38.52  | 43.67  | 34.49  | 47.86  | 70.75  | 38.69  | 45.12  | 77.23  | 72.84  | 90.17  | 46.54  | 38.64  | 50.82  | 53.71  |
| chr17 | 79478215 | 79478652 | ACTG1  | 42.98  | 49.42  | 40.72  | 59.72  | 81.64  | 46.95  | 58.72  | 78.88  | 65.09  | 133.66 | 54.74  | 42.50  | 57.02  | 62.92  |
| chr17 | 79478930 | 79479168 | ACTG1  | 53.28  | 69.25  | 46.54  | 79.89  | 96.35  | 55.09  | 70.69  | 93.54  | 85.59  | 141.23 | 60.42  | 46.09  | 77.31  | 74.83  |
| chr17 | 79479259 | 79479386 | ACTG1  | 109.76 | 166.02 | 120.62 | 155.80 | 249.28 | 124.52 | 161.99 | 206.68 | 191.84 | 403.37 | 162.88 | 124.86 | 175.04 | 181.47 |
| chr17 | 79479761 | 79479892 | ACTG1  | 0.17   | 0.79   | 1.10   | 1.62   | 1.56   | 0.86   | 0.63   | 0.00   | 1.71   | 2.56   | 0.37   | 0.00   | 0.66   | 0.95   |
| chr18 | 44057436 | 44057915 | LOXHD1 | 45.75  | 60.78  | 38.42  | 53.35  | 84.23  | 45.37  | 62.52  | 91.74  | 60.47  | 119.61 | 57.03  | 37.19  | 62.80  | 63.04  |
| chr18 | 44063551 | 44063708 | LOXHD1 | 19.08  | 32.16  | 21.94  | 31.92  | 50.77  | 22.50  | 21.54  | 51.56  | 40.13  | 54.89  | 31.46  | 29.92  | 2      |        |

|       |          |          |          |        |        |        |        |        |        |        |        |        |        |        |        |        |        |
|-------|----------|----------|----------|--------|--------|--------|--------|--------|--------|--------|--------|--------|--------|--------|--------|--------|--------|
| chr18 | 44125281 | 44125384 | LOXHD1   | 110.27 | 140.61 | 105.43 | 92.40  | 136.27 | 86.10  | 179.96 | 234.26 | 190.88 | 49.46  | 125.61 | 102.35 | 108.42 | 129.47 |
| chr18 | 44126859 | 44127021 | LOXHD1   | 58.47  | 81.20  | 66.28  | 73.46  | 103.74 | 59.79  | 77.66  | 127.27 | 101.50 | 117.91 | 91.72  | 57.67  | 75.96  | 84.72  |
| chr18 | 44137320 | 44137452 | LOXHD1   | 43.21  | 46.28  | 39.41  | 53.74  | 64.16  | 31.52  | 63.40  | 82.09  | 53.17  | 110.41 | 54.34  | 27.03  | 47.99  | 55.73  |
| chr18 | 44139412 | 44139565 | LOXHD1   | 70.31  | 82.68  | 50.71  | 66.96  | 106.03 | 69.69  | 66.15  | 110.79 | 100.98 | 177.64 | 78.94  | 57.96  | 62.99  | 86.57  |
| chr18 | 44140047 | 44140508 | LOXHD1   | 35.82  | 59.15  | 33.50  | 46.51  | 68.16  | 40.05  | 51.58  | 88.70  | 69.64  | 104.67 | 54.06  | 39.46  | 56.16  | 57.61  |
| chr18 | 44143029 | 44143188 | LOXHD1   | 24.17  | 36.79  | 37.73  | 33.99  | 39.96  | 21.01  | 36.62  | 50.95  | 41.49  | 48.78  | 32.34  | 27.07  | 36.36  | 35.91  |
| chr18 | 44146221 | 44146412 | LOXHD1   | 32.92  | 29.72  | 28.02  | 35.42  | 60.70  | 29.17  | 39.30  | 56.52  | 38.14  | 111.13 | 39.59  | 24.49  | 42.99  | 43.76  |
| chr18 | 44149406 | 44149601 | LOXHD1   | 31.60  | 52.50  | 32.59  | 32.08  | 41.47  | 30.52  | 37.13  | 85.72  | 60.21  | 43.86  | 45.41  | 29.53  | 41.31  | 43.55  |
| chr18 | 44152050 | 44152125 | LOXHD1   | 52.93  | 52.45  | 53.84  | 64.38  | 77.63  | 57.08  | 66.78  | 110.51 | 70.22  | 115.28 | 65.14  | 49.28  | 63.39  | 69.63  |
| chr18 | 44157671 | 44157830 | LOXHD1   | 43.21  | 46.93  | 34.98  | 40.23  | 86.29  | 42.23  | 47.34  | 69.30  | 54.19  | 95.51  | 44.16  | 36.07  | 58.29  | 53.37  |
| chr18 | 44159594 | 44159747 | LOXHD1   | 43.18  | 40.32  | 23.23  | 32.63  | 42.50  | 21.34  | 34.95  | 68.01  | 46.90  | 58.05  | 42.98  | 23.54  | 36.10  | 39.80  |
| chr18 | 44171897 | 44172031 | LOXHD1   | 38.00  | 88.36  | 58.81  | 48.58  | 90.04  | 51.03  | 82.49  | 143.25 | 96.75  | 85.60  | 67.85  | 61.90  | 75.82  | 76.06  |
| chr18 | 44172462 | 44172547 | LOXHD1   | 104.16 | 125.01 | 66.10  | 105.28 | 126.01 | 87.38  | 161.10 | 197.01 | 167.78 | 104.13 | 99.21  | 86.42  | 82.58  | 119.13 |
| chr18 | 44173564 | 44173723 | LOXHD1   | 50.98  | 71.84  | 39.51  | 50.54  | 58.58  | 39.76  | 77.68  | 97.12  | 80.35  | 56.33  | 62.79  | 40.14  | 53.17  | 60.47  |
| chr18 | 44174295 | 44174429 | LOXHD1   | 27.64  | 27.97  | 22.90  | 17.47  | 37.90  | 15.98  | 36.24  | 50.59  | 30.74  | 33.95  | 33.33  | 20.45  | 24.22  | 29.60  |
| chr18 | 44181181 | 44181430 | LOXHD1   | 48.98  | 66.13  | 44.02  | 55.58  | 87.79  | 50.86  | 79.23  | 80.04  | 75.48  | 120.40 | 58.01  | 39.71  | 54.37  | 67.19  |
| chr18 | 44184070 | 44184192 | LOXHD1   | 40.39  | 48.08  | 34.66  | 39.44  | 64.96  | 36.83  | 46.26  | 73.37  | 64.36  | 51.95  | 53.92  | 42.47  | 47.53  | 49.72  |
| chr18 | 44190740 | 44190887 | LOXHD1   | 34.08  | 55.19  | 45.27  | 45.51  | 57.40  | 33.57  | 61.12  | 66.26  | 62.13  | 68.30  | 42.96  | 38.32  | 43.98  | 50.84  |
| chr18 | 44198156 | 44198253 | LOXHD1   | 49.74  | 83.19  | 50.55  | 50.56  | 70.79  | 55.19  | 93.71  | 102.62 | 108.15 | 30.10  | 62.06  | 71.88  | 56.56  | 69.05  |
| chr18 | 44219580 | 44219763 | LOXHD1   | 43.21  | 57.10  | 42.81  | 55.62  | 85.73  | 58.10  | 60.11  | 104.69 | 64.58  | 118.06 | 69.04  | 28.30  | 54.80  | 65.61  |
| chr18 | 44221920 | 44221999 | LOXHD1   | 79.86  | 85.74  | 49.46  | 65.83  | 103.40 | 73.85  | 114.98 | 156.00 | 99.04  | 110.90 | 79.90  | 62.44  | 94.19  | 90.12  |
| chr18 | 44229119 | 44229232 | LOXHD1   | 25.95  | 30.36  | 14.75  | 17.58  | 39.99  | 20.52  | 32.35  | 43.05  | 28.90  | 74.23  | 23.46  | 14.84  | 29.91  | 30.50  |
| chr18 | 44236868 | 44236996 | LOXHD1   | 29.65  | 47.31  | 28.32  | 47.64  | 74.22  | 37.87  | 52.40  | 68.51  | 51.75  | 109.47 | 37.38  | 33.62  | 38.84  | 51.51  |
| chr19 | 3585597  | 3585820  | GIPC3    | 17.32  | 23.61  | 13.16  | 20.16  | 26.59  | 18.23  | 21.70  | 33.97  | 24.76  | 38.74  | 24.42  | 14.63  | 22.68  | 23.11  |
| chr19 | 3586494  | 3586678  | GIPC3    | 79.08  | 84.48  | 79.43  | 82.56  | 175.15 | 74.67  | 106.48 | 120.71 | 106.00 | 182.59 | 94.94  | 63.36  | 102.46 | 104.12 |
| chr19 | 3586813  | 3586992  | GIPC3    | 89.73  | 122.56 | 91.15  | 116.77 | 164.62 | 94.66  | 128.23 | 169.21 | 130.73 | 242.69 | 29.77  | 75.11  | 110.24 | 127.06 |
| chr19 | 3589442  | 3589553  | GIPC3    | 48.65  | 61.71  | 61.54  | 65.63  | 61.54  | 111.71 | 73.60  | 93.51  | 65.78  | 69.13  | 56.22  | 42.63  | 42.79  | 67.64  |
| chr19 | 3589830  | 3589910  | GIPC3    | 49.47  | 40.28  | 34.27  | 44.84  | 70.02  | 31.63  | 46.93  | 61.38  | 49.78  | 123.06 | 41.11  | 34.49  | 54.48  | 52.27  |
| chr19 | 3590038  | 3590188  | GIPC3    | 33.97  | 38.07  | 27.03  | 46.06  | 77.11  | 26.58  | 36.77  | 55.23  | 35.28  | 111.56 | 35.21  | 24.03  | 54.60  | 45.57  |
| chr19 | 10334521 | 10335623 | S1PR2    | 74.35  | 101.11 | 67.89  | 95.06  | 135.51 | 73.57  | 96.12  | 145.98 | 102.40 | 219.14 | 90.07  | 68.73  | 103.02 | 105.83 |
| chr19 | 36494240 | 36494422 | SYNE4    | 49.28  | 80.39  | 46.28  | 56.38  | 99.87  | 41.84  | 79.43  | 120.58 | 107.72 | 106.70 | 65.67  | 52.32  | 66.17  | 75.54  |
| chr19 | 36494516 | 36494573 | SYNE4    | 22.71  | 27.40  | 19.50  | 25.86  | 38.97  | 18.74  | 24.10  | 35.78  | 28.03  | 34.10  | 18.45  | 18.76  | 24.03  | 26.03  |
| chr19 | 36496236 | 36496339 | SYNE4    | 67.87  | 103.85 | 63.71  | 66.24  | 118.84 | 58.52  | 107.33 | 136.25 | 130.88 | 169.22 | 100.32 | 65.38  | 82.10  | 99.03  |
| chr19 | 36497326 | 36497373 | SYNE4    | 29.77  | 49.90  | 17.12  | 26.90  | 47.43  | 24.07  | 34.94  | 43.01  | 32.96  | 65.62  | 30.92  | 16.08  | 24.21  | 33.23  |
| chr19 | 36497653 | 36497846 | SYNE4    | 43.42  | 49.36  | 28.53  | 33.72  | 68.64  | 35.23  | 51.49  | 57.75  | 39.45  | 98.66  | 50.04  | 26.82  | 45.15  | 48.59  |
| chr19 | 36498028 | 36498170 | SYNE4    | 20.33  | 22.21  | 8.15   | 21.01  | 43.64  | 18.29  | 16.30  | 36.22  | 26.13  | 57.70  | 19.70  | 13.62  | 15.45  | 25.28  |
| chr19 | 36499120 | 36499269 | SYNE4    | 16.41  | 23.95  | 12.73  | 22.05  | 35.07  | 20.84  | 35.15  | 39.67  | 28.91  | 43.73  | 20.49  | 20.00  | 28.13  | 26.58  |
| chr19 | 36499457 | 36499583 | SYNE4    | 26.57  | 24.24  | 12.40  | 24.72  | 49.64  | 16.85  | 24.41  | 32.30  | 30.80  | 78.39  | 27.18  | 19.50  | 28.14  | 30.58  |
| chr19 | 45204632 | 45204763 | CEACAM16 | 32.24  | 31.10  | 27.46  | 36.73  | 64.20  | 32.17  | 37.07  | 56.59  | 52.27  | 94.46  | 39.02  | 21.52  | 42.46  | 43.74  |
| chr19 | 45206620 | 45206963 | CEACAM16 | 32.06  | 35.29  | 36.22  | 41.79  | 69.40  | 36.23  | 45.19  | 54.98  | 48.33  | 101.91 | 42.73  | 28.67  | 50.32  | 47.73  |
| chr19 | 45207289 | 45207566 | CEACAM16 | 28.04  | 34.68  | 16.52  | 35.74  | 60.58  | 24.12  | 31.42  | 39.85  | 41.38  | 72.86  | 35.40  | 15.86  | 37.80  | 36.37  |
| chr19 | 45208861 | 45209138 | CEACAM16 | 72.55  | 82.03  | 69.52  | 87.39  | 122.87 | 73.83  | 91.51  | 125.78 | 97.73  | 187.09 | 87.72  | 63.38  | 94.04  | 96.78  |
| chr19 | 45211134 | 45211459 | CEACAM16 | 64.31  | 54.74  | 55.55  | 61.31  | 119.10 | 57.90  | 69.10  | 94.85  | 72.35  | 163.41 | 61.17  | 51.83  | 72.32  | 77.14  |
| chr19 | 45213769 | 45213778 | CEACAM16 | 64.10  | 74.30  | 46.40  | 70.90  | 123.30 | 71.30  | 113.40 | 109.00 | 79.00  | 153.60 | 74.90  | 58.10  | 71.00  | 86.53  |
| chr19 | 50713621 | 50714027 | MYH14    | 67.49  | 84.26  | 56.29  | 57.05  | 128.19 | 60.64  | 79.61  | 108.78 | 90.90  | 156.31 | 61.98  | 51.63  | 79.21  | 83.59  |
| chr19 | 50720873 | 50721028 | MYH14    | 82.08  | 92.40  | 57.48  | 88.92  | 149.90 | 76.17  | 104.38 | 142.65 | 93.37  | 200.96 | 111.55 | 64.54  | 98.45  | 105.38 |
| chr19 | 50726341 | 50726367 | MYH14    | 67.11  | 70.59  | 61.56  | 72.33  | 92.70  | 61.11  | 88.15  | 103.74 | 70.41  | 127.04 | 62.19  | 47.74  | 90.48  | 77.06  |
| chr19 | 50726505 | 50726606 | MYH14    | 74.37  | 82.02  | 67.62  | 69.11  | 120.33 | 76.73  | 95.99  | 126.03 | 95.08  | 164.42 | 85.75  | 62.90  | 101.30 | 93.36  |
| chr19 | 50727412 | 50727434 | MYH14    | 61.83  | 65.87  | 39.65  | 42.91  | 79.04  | 47.30  | 75.09  | 85.74  | 83.04  | 112.74 | 53.00  | 40.22  | 66.17  | 65.54  |
| chr19 | 50728843 | 50728934 | MYH14    | 36.00  | 46.26  | 25.91  | 48.39  | 66.67  | 40.71  | 50.33  | 65.70  | 58.59  | 112.73 | 48.23  | 34.55  | 42.88  | 52.84  |
| chr19 | 50730161 | 50730223 | MYH14    | 85.90  | 111.78 | 85.81  | 104.08 | 167.06 | 76.86  | 139.87 | 192.54 | 160.21 | 248.10 | 107.87 | 73.79  | 123.05 | 129.49 |
| chr19 | 50733783 | 50733880 | MYH14    | 23.18  | 34.16  | 19.68  | 20.59  | 46.87  | 24.58  | 37.09  | 55.51  | 40.06  | 76.33  | 31.70  | 27.40  | 35.03  | 36.43  |
| chr19 | 50735188 | 50735327 | MYH14    | 60.10  | 78.26  | 58.84  | 90.88  | 134.81 | 61.27  | 80.34  | 122.10 | 89.71  | 180.66 | 96.09  | 61.48  | 87.86  | 92.88  |
| chr19 | 50747500 | 50747594 | MYH14    | 62.58  | 76.22  | 53.79  | 72.57  | 106.79 | 51.17  | 65.38  | 104.68 | 82.07  | 145.98 | 87.76  | 46.03  | 66.41  | 79.59  |
| chr19 | 50750262 | 50750379 | MYH14    | 57.92  | 76.09  | 39.87  | 64.39  | 98.08  | 48.18  | 65.67  | 77.90  | 87.47  | 145.25 | 68.65  | 42.97  | 65.44  | 72.70  |
| chr19 | 50752245 | 50752396 | MYH14    | 41.64  | 54.62  | 37.52  | 41.31  | 82.52  | 46.59  | 69.67  | 83.54  | 76.95  | 117.43 | 72.26  | 51.43  | 69.44  | 64.62  |
| chr19 | 50752908 | 50753080 | MYH14    | 43.46  | 40.14  | 28.69  | 54.99  | 67.58  | 31.80  | 40.02  | 62.73  | 50.19  | 121.56 | 46.93  | 18.02  | 50.55  | 50.51  |
| chr19 | 50753773 | 50753945 | MYH14    | 54.75  | 81.29  | 43.13  | 56.70  | 110.68 | 51.26  | 75.98  | 110.32 | 87.08  | 138.02 | 64.83  | 41.68  | 72.38  | 76.31  |
| chr19 | 50755897 | 50756010 | MYH14    | 66.13  | 87.51  | 70.67  | 87.55  | 129.20 | 80.45  | 95.02  | 133.82 | 110.54 | 171.10 | 85.75  | 80.13  | 83.50  | 99.82  |
| chr19 | 50758478 | 50758575 | MYH14    | 22.54  | 33.19  | 27.81  | 25.34  | 50.76  | 23.58  | 35.38  | 46.80  | 45.02  | 58.87  | 37.47  | 19.27  | 37.12  | 35.50  |
| chr19 | 50760557 | 50760743 | MYH14    | 93.55  | 114.86 | 93.05  | 84.36  | 121.69 | 84.86  | 97.39  | 140.68 | 133.24 | 232.74 | 95.69  | 69.12  | 109.30 | 113.43 |
| chr19 | 50762402 | 50762522 | MYH14    | 41.82  | 49.28  | 43.29  | 42.82  | 76.21  | 37.84  | 60.48  | 72.34  | 50.98  | 98.17  | 43.40  | 42.79  | 55.86  | 54.95  |
| chr19 | 50763904 | 50763972 | MYH14    | 115.17 | 119.62 | 87.25  | 146.30 | 191.90 | 78.00  | 131.09 | 204.13 | 131.52 | 296.22 | 146.16 | 74.54  | 156.13 | 143.49 |
| chr19 | 50764733 | 50764892 | MYH14    | 28.36  | 31.56  | 19.19  | 29.69  | 48.24  | 14.59  | 27.94  | 41.84  | 34.56  | 81.07  | 33.68  | 17.57  | 28.46  | 34.02  |
| chr19 | 50766570 | 50766677 | MYH14    | 24.22  | 29.15  | 21.14  | 21.41  | 49.88  | 15.52  | 25.19  | 36.87  | 24.68  | 61.07  | 33.33  | 21.84  | 32.50  | 30.36  |
|       |          |          |          |        |        |        |        |        |        |        |        |        |        |        |        |        |        |

|       |          |          |         |       |        |       |       |        |       |        |        |        |        |        |       |        |        |
|-------|----------|----------|---------|-------|--------|-------|-------|--------|-------|--------|--------|--------|--------|--------|-------|--------|--------|
| chr19 | 50796491 | 50796578 | MYH14   | 66.81 | 93.51  | 52.24 | 71.32 | 91.68  | 52.57 | 74.08  | 126.47 | 82.27  | 178.06 | 75.01  | 53.78 | 74.19  | 84.82  |
| chr19 | 50796822 | 50796944 | MYH14   | 14.32 | 21.44  | 14.55 | 24.40 | 24.07  | 11.54 | 20.83  | 20.41  | 21.74  | 41.37  | 24.21  | 10.80 | 20.75  | 20.81  |
| chr19 | 50804919 | 50805126 | MYH14   | 32.46 | 39.54  | 26.71 | 41.41 | 45.52  | 30.66 | 55.66  | 65.81  | 50.26  | 61.27  | 30.09  | 29.50 | 35.76  | 42.41  |
| chr19 | 50810307 | 50810414 | MYH14   | 15.50 | 27.74  | 20.31 | 21.41 | 34.61  | 19.10 | 28.50  | 39.78  | 23.93  | 46.58  | 16.83  | 18.50 | 22.55  | 26.07  |
| chr19 | 50812263 | 50812434 | MYH14   | 41.02 | 58.94  | 44.34 | 54.69 | 87.60  | 33.59 | 56.93  | 89.31  | 66.76  | 113.76 | 52.41  | 34.62 | 61.06  | 61.16  |
| chr19 | 50812898 | 50813047 | MYH14   | 42.82 | 44.92  | 23.90 | 36.22 | 64.59  | 24.13 | 42.40  | 50.16  | 55.60  | 90.67  | 52.98  | 25.47 | 44.11  | 46.15  |
| chr20 | 60831114 | 60831277 | OSBPL2  | 53.88 | 77.05  | 42.64 | 39.85 | 58.16  | 31.66 | 66.79  | 98.09  | 65.72  | 32.31  | 44.57  | 27.15 | 50.07  | 53.16  |
| chr20 | 60835038 | 60835181 | OSBPL2  | 78.19 | 112.05 | 77.11 | 93.13 | 127.15 | 69.60 | 123.81 | 152.41 | 130.40 | 90.34  | 99.82  | 67.69 | 83.85  | 101.81 |
| chr20 | 60838673 | 60838747 | OSBPL2  | 68.23 | 77.29  | 53.53 | 76.32 | 101.23 | 60.45 | 61.43  | 119.47 | 87.16  | 165.77 | 85.27  | 45.12 | 87.27  | 83.44  |
| chr20 | 60839686 | 60839774 | OSBPL2  | 0.00  | 0.00   | 0.00  | 0.43  | 0.00   | 0.82  | 0.00   | 0.00   | 0.00   | 0.00   | 0.00   | 0.00  | 0.00   | 0.19   |
| chr20 | 60847182 | 60847315 | OSBPL2  | 83.09 | 86.12  | 63.46 | 95.09 | 154.77 | 63.66 | 93.25  | 115.05 | 107.30 | 204.40 | 97.42  | 51.29 | 122.33 | 101.24 |
| chr20 | 60848366 | 60848462 | OSBPL2  | 36.03 | 52.46  | 32.98 | 36.04 | 62.92  | 33.24 | 53.07  | 81.55  | 67.88  | 48.00  | 45.54  | 27.95 | 35.14  | 48.14  |
| chr20 | 60854214 | 60854395 | OSBPL2  | 55.65 | 70.33  | 63.05 | 57.58 | 83.33  | 56.17 | 87.49  | 142.03 | 94.49  | 77.31  | 58.63  | 53.31 | 58.28  | 74.95  |
| chr20 | 60856115 | 60856221 | OSBPL2  | 54.47 | 55.32  | 37.10 | 52.64 | 82.93  | 42.17 | 59.83  | 81.36  | 61.12  | 127.98 | 50.01  | 39.09 | 65.50  | 62.67  |
| chr20 | 60856847 | 60856935 | OSBPL2  | 70.93 | 113.81 | 64.12 | 74.82 | 130.67 | 82.17 | 142.20 | 193.91 | 130.11 | 115.22 | 90.25  | 70.45 | 97.06  | 106.56 |
| chr20 | 60859103 | 60859225 | OSBPL2  | 64.56 | 97.52  | 68.58 | 80.95 | 95.42  | 69.63 | 97.73  | 145.06 | 108.02 | 103.17 | 82.07  | 67.39 | 79.09  | 90.01  |
| chr20 | 60861640 | 60861767 | OSBPL2  | 50.92 | 75.35  | 47.30 | 47.89 | 67.94  | 41.05 | 72.46  | 76.15  | 69.66  | 135.34 | 63.58  | 40.95 | 57.24  | 65.72  |
| chr20 | 60864264 | 60864386 | OSBPL2  | 36.73 | 46.16  | 36.23 | 38.24 | 49.14  | 24.36 | 41.92  | 67.72  | 39.03  | 89.95  | 33.10  | 31.50 | 45.15  | 44.51  |
| chr20 | 60866760 | 60866849 | OSBPL2  | 41.83 | 68.51  | 31.91 | 48.70 | 79.30  | 42.89 | 75.48  | 77.36  | 80.17  | 100.94 | 47.42  | 47.33 | 61.87  | 61.82  |
| chr20 | 60868842 | 60869013 | OSBPL2  | 60.28 | 83.72  | 65.99 | 69.53 | 108.84 | 65.49 | 85.91  | 100.48 | 97.39  | 150.43 | 99.29  | 53.03 | 85.52  | 86.70  |
| chr21 | 37833275 | 37834074 | CLDN14  | 40.06 | 45.60  | 35.47 | 43.99 | 74.14  | 40.93 | 49.20  | 74.37  | 48.95  | 104.64 | 42.54  | 30.30 | 52.36  | 52.59  |
| chr21 | 37849673 | 37849861 | CLDN14  | 0.00  | 0.59   | 0.00  | 0.00  | 0.37   | 0.19  | 0.19   | 0.00   | 0.00   | 0.63   | 0.00   | 0.00  | 0.00   | 0.16   |
| chr21 | 37882662 | 37882798 | CLDN14  | 1.00  | 1.15   | 0.98  | 0.44  | 0.00   | 0.78  | 0.00   | 0.51   | 0.94   | 0.00   | 0.85   | 0.00  | 0.00   | 0.55   |
| chr21 | 43792872 | 43792888 | TMPRSS3 | 34.47 | 44.65  | 44.47 | 48.29 | 56.41  | 41.65 | 74.35  | 87.29  | 71.00  | 76.29  | 47.47  | 31.59 | 48.06  | 54.83  |
| chr21 | 43795826 | 43795977 | TMPRSS3 | 31.91 | 64.51  | 32.67 | 44.78 | 70.45  | 44.09 | 61.07  | 76.34  | 60.27  | 118.58 | 55.30  | 40.16 | 53.17  | 58.34  |
| chr21 | 43796651 | 43796795 | TMPRSS3 | 39.32 | 39.77  | 33.44 | 52.16 | 63.02  | 28.41 | 51.49  | 71.08  | 47.18  | 104.55 | 45.11  | 28.84 | 46.61  | 50.36  |
| chr21 | 43800227 | 43800321 | TMPRSS3 | 35.43 | 52.00  | 28.28 | 31.43 | 48.96  | 26.88 | 33.47  | 45.75  | 50.38  | 54.95  | 37.19  | 26.36 | 30.40  | 39.26  |
| chr21 | 43802092 | 43802343 | TMPRSS3 | 58.40 | 80.65  | 52.49 | 50.31 | 84.46  | 52.76 | 76.07  | 139.56 | 104.74 | 75.00  | 84.65  | 47.81 | 72.81  | 75.57  |
| chr21 | 43803143 | 43803307 | TMPRSS3 | 53.96 | 67.78  | 45.38 | 58.32 | 90.36  | 61.08 | 66.22  | 87.99  | 74.18  | 150.90 | 65.32  | 47.32 | 65.41  | 72.40  |
| chr21 | 43804080 | 43804122 | TMPRSS3 | 39.05 | 62.65  | 45.79 | 51.63 | 83.07  | 46.98 | 64.51  | 71.60  | 81.23  | 61.30  | 54.21  | 34.98 | 51.86  | 58.08  |
| chr21 | 43805519 | 43805643 | TMPRSS3 | 49.67 | 61.88  | 45.17 | 56.13 | 77.32  | 45.13 | 71.44  | 101.86 | 79.47  | 90.22  | 62.79  | 54.47 | 60.04  | 66.30  |
| chr21 | 43808513 | 43808635 | TMPRSS3 | 72.26 | 100.83 | 60.48 | 80.46 | 94.52  | 57.93 | 90.11  | 181.19 | 116.67 | 140.27 | 79.95  | 43.15 | 75.15  | 93.15  |
| chr21 | 43809039 | 43809154 | TMPRSS3 | 16.28 | 29.08  | 15.75 | 22.06 | 41.62  | 19.28 | 24.87  | 42.10  | 33.69  | 46.96  | 25.16  | 18.18 | 22.47  | 27.92  |
| chr21 | 43810037 | 43810146 | TMPRSS3 | 45.06 | 46.61  | 38.56 | 40.35 | 42.45  | 27.19 | 65.17  | 73.11  | 68.88  | 55.45  | 39.35  | 33.87 | 42.30  | 48.01  |
| chr21 | 43815434 | 43815577 | TMPRSS3 | 42.88 | 54.78  | 41.74 | 35.10 | 63.36  | 40.32 | 52.84  | 66.01  | 62.47  | 71.81  | 51.82  | 28.81 | 36.59  | 50.99  |
| chr21 | 43816052 | 43816955 | TMPRSS3 | 6.43  | 7.64   | 5.92  | 8.28  | 8.50   | 6.36  | 9.34   | 12.63  | 9.51   | 15.57  | 9.13   | 5.03  | 7.48   | 8.69   |
| chr21 | 45919667 | 45919819 | TSPEAR  | 18.39 | 29.03  | 18.76 | 22.22 | 42.13  | 20.19 | 30.20  | 29.37  | 29.51  | 58.54  | 24.90  | 17.46 | 28.84  | 28.39  |
| chr21 | 45924664 | 45924764 | TSPEAR  | 75.94 | 88.63  | 54.40 | 69.93 | 112.72 | 41.83 | 77.02  | 99.01  | 95.46  | 153.35 | 81.14  | 50.66 | 72.80  | 83.34  |
| chr21 | 45929083 | 45929269 | TSPEAR  | 47.50 | 70.10  | 30.60 | 59.34 | 70.34  | 49.99 | 60.88  | 91.08  | 82.57  | 113.74 | 52.22  | 32.73 | 49.41  | 63.43  |
| chr21 | 45941767 | 45941995 | TSPEAR  | 77.46 | 100.17 | 69.13 | 94.78 | 111.45 | 69.30 | 113.13 | 115.92 | 96.53  | 225.22 | 89.89  | 71.80 | 97.64  | 102.90 |
| chr21 | 45945537 | 45945722 | TSPEAR  | 52.16 | 72.94  | 47.48 | 62.35 | 93.46  | 53.82 | 76.58  | 115.47 | 86.60  | 120.42 | 72.39  | 54.30 | 63.02  | 75.66  |
| chr21 | 45947176 | 45947401 | TSPEAR  | 64.85 | 81.59  | 43.72 | 71.03 | 88.37  | 59.05 | 78.13  | 124.62 | 99.85  | 158.21 | 67.88  | 51.69 | 67.47  | 82.42  |
| chr21 | 45948336 | 45948466 | TSPEAR  | 51.08 | 60.92  | 51.27 | 72.71 | 89.31  | 59.11 | 63.88  | 97.51  | 60.15  | 162.18 | 63.14  | 56.50 | 91.34  | 73.98  |
| chr21 | 45949682 | 45949837 | TSPEAR  | 99.31 | 118.03 | 68.64 | 93.21 | 148.43 | 71.52 | 133.26 | 164.79 | 144.30 | 225.96 | 101.10 | 66.98 | 90.60  | 119.63 |
| chr21 | 45950927 | 45951016 | TSPEAR  | 65.97 | 86.89  | 43.37 | 63.56 | 95.94  | 63.79 | 85.84  | 94.97  | 75.03  | 162.53 | 73.00  | 48.84 | 72.86  | 79.98  |
| chr21 | 45953569 | 45953806 | TSPEAR  | 46.90 | 45.41  | 27.80 | 66.59 | 100.66 | 43.24 | 56.50  | 73.49  | 57.78  | 133.47 | 62.85  | 44.38 | 81.71  | 63.26  |
| chr21 | 45987670 | 45987889 | TSPEAR  | 61.43 | 72.20  | 59.28 | 74.62 | 106.95 | 59.65 | 84.70  | 100.21 | 88.94  | 151.68 | 77.57  | 55.51 | 78.22  | 82.73  |
| chr21 | 46110461 | 46110521 | TSPEAR  | 0.00  | 0.00   | 0.00  | 0.00  | 0.00   | 0.00  | 0.00   | 1.00   | 0.00   | 1.00   | 0.00   | 0.00  | 0.00   | 0.17   |
| chr21 | 46131349 | 46131429 | TSPEAR  | 61.89 | 85.98  | 52.93 | 75.69 | 116.43 | 58.60 | 79.48  | 123.01 | 99.80  | 161.47 | 69.10  | 68.83 | 85.63  | 87.77  |
| chr22 | 36678715 | 36678831 | MYH9    | 41.32 | 37.53  | 28.06 | 57.90 | 67.49  | 41.74 | 52.74  | 85.79  | 65.23  | 130.48 | 59.47  | 31.14 | 53.23  | 58.24  |
| chr22 | 36680140 | 36680311 | MYH9    | 41.99 | 60.03  | 39.40 | 37.38 | 68.42  | 34.70 | 66.13  | 78.98  | 74.02  | 111.35 | 33.88  | 36.56 | 44.53  | 56.90  |
| chr22 | 36680450 | 36680557 | MYH9    | 72.23 | 74.68  | 49.92 | 84.96 | 136.49 | 65.46 | 75.25  | 97.54  | 99.53  | 187.81 | 81.80  | 57.65 | 82.51  | 90.28  |
| chr22 | 36681168 | 36681375 | MYH9    | 35.50 | 48.33  | 31.09 | 43.19 | 66.79  | 29.92 | 51.81  | 79.18  | 51.61  | 100.58 | 44.20  | 29.18 | 56.23  | 50.95  |
| chr22 | 36681705 | 36681827 | MYH9    | 13.89 | 12.94  | 12.48 | 16.33 | 37.09  | 9.53  | 19.34  | 16.52  | 17.33  | 41.41  | 15.07  | 12.36 | 26.03  | 18.69  |
| chr22 | 36681912 | 36681999 | MYH9    | 38.69 | 40.67  | 31.73 | 37.88 | 83.77  | 24.43 | 48.61  | 61.67  | 50.01  | 100.47 | 55.88  | 28.06 | 48.55  | 50.16  |
| chr22 | 36682765 | 36682892 | MYH9    | 46.78 | 32.77  | 38.34 | 61.88 | 84.80  | 42.94 | 49.30  | 59.52  | 53.09  | 124.77 | 33.19  | 38.33 | 55.95  | 55.48  |
| chr22 | 36684299 | 36684459 | MYH9    | 36.36 | 59.37  | 32.05 | 54.39 | 63.89  | 46.46 | 50.48  | 49.28  | 57.31  | 118.61 | 66.16  | 36.04 | 64.24  | 55.87  |
| chr22 | 36684774 | 36684985 | MYH9    | 50.34 | 47.79  | 42.24 | 52.50 | 99.59  | 41.45 | 55.37  | 63.99  | 51.70  | 124.87 | 58.99  | 41.31 | 57.98  | 60.84  |
| chr22 | 36685132 | 36685343 | MYH9    | 35.84 | 44.33  | 22.32 | 36.21 | 66.46  | 31.09 | 36.79  | 51.75  | 31.17  | 105.85 | 42.19  | 25.09 | 37.86  | 44.09  |
| chr22 | 36688033 | 36688280 | MYH9    | 65.30 | 63.68  | 55.35 | 59.21 | 99.24  | 44.19 | 70.90  | 90.92  | 84.43  | 159.85 | 76.13  | 55.39 | 72.25  | 77.05  |
| chr22 | 36689376 | 36689527 | MYH9    | 44.11 | 42.84  | 27.45 | 52.96 | 73.34  | 32.76 | 56.99  | 53.51  | 43.21  | 106.89 | 40.22  | 34.74 | 46.82  | 50.75  |
| chr22 | 36689806 | 36689909 | MYH9    | 49.92 | 54.44  | 38.60 | 53.43 | 70.31  | 44.25 | 59.81  | 80.27  | 63.00  | 120.68 | 61.23  | 46.48 | 54.18  | 61.87  |
| chr22 | 36690139 | 36690344 | MYH9    | 69.99 | 75.60  | 51.83 | 85.72 | 128.70 | 60.43 | 90.90  | 117.75 | 91.32  | 188.28 | 82.56  | 50.95 | 82.89  | 91.17  |
| chr22 | 36690979 | 36691122 | MYH9    | 34.89 | 42.31  | 36.60 | 50.66 | 80.22  | 26.83 | 40.51  | 56.03  | 57.08  | 114.94 | 51.05  | 40.88 | 46.74  | 52.67  |
| chr22 | 36691552 | 36691763 | MYH9    | 18.49 | 27.26  | 19.75 | 33.58 | 42.20  | 19.14 | 27.02  | 34.92  | 30.85  | 48.97  | 22.72  | 18.22 | 28.10  | 28.59  |
| chr22 | 36692890 | 36693060 | MYH9    | 23.19 | 27.61  | 21.43 | 23.70 | 38.15  | 26.68 | 39.57  | 43.93  | 36.53  | 84.92  | 37.74  |       |        |        |



|       |           |           |        |        |        |        |        |        |        |        |        |        |        |        |        |        |         |
|-------|-----------|-----------|--------|--------|--------|--------|--------|--------|--------|--------|--------|--------|--------|--------|--------|--------|---------|
| chr22 | 36715586  | 36715680  | MYH9   | 98.67  | 123.83 | 96.28  | 119.48 | 179.61 | 75.20  | 129.92 | 140.15 | 135.13 | 213.34 | 122.11 | 98.82  | 117.45 | 127.71  |
| chr22 | 36716266  | 36716408  | MYH9   | 75.93  | 85.53  | 68.75  | 82.73  | 121.99 | 52.33  | 96.93  | 146.91 | 100.60 | 190.19 | 77.24  | 49.78  | 85.69  | 95.74   |
| chr22 | 36716844  | 36716941  | MYH9   | 25.62  | 25.31  | 23.46  | 31.98  | 45.38  | 20.20  | 25.05  | 52.61  | 44.16  | 49.14  | 31.19  | 21.94  | 33.54  | 33.00   |
| chr22 | 36717804  | 36717866  | MYH9   | 62.27  | 71.98  | 44.56  | 50.78  | 77.30  | 47.95  | 90.27  | 104.73 | 83.59  | 82.97  | 66.79  | 51.63  | 52.32  | 69.57   |
| chr22 | 36718475  | 36718566  | MYH9   | 53.78  | 63.36  | 45.03  | 65.40  | 86.16  | 45.52  | 64.82  | 74.40  | 78.20  | 140.89 | 41.60  | 41.17  | 69.43  | 66.69   |
| chr22 | 36722614  | 36722706  | MYH9   | 51.99  | 64.18  | 38.22  | 69.83  | 94.13  | 52.91  | 57.24  | 94.95  | 70.06  | 127.81 | 59.16  | 24.73  | 49.99  | 67.10   |
| chr22 | 36723507  | 36723533  | MYH9   | 30.93  | 58.59  | 29.41  | 41.04  | 64.52  | 32.07  | 49.70  | 72.33  | 62.89  | 44.30  | 53.07  | 35.00  | 38.00  | 47.82   |
| chr22 | 36737416  | 36737571  | MYH9   | 53.06  | 58.61  | 38.02  | 43.23  | 55.79  | 33.63  | 52.35  | 84.15  | 64.80  | 39.09  | 55.03  | 34.17  | 43.57  | 50.99   |
| chr22 | 36744950  | 36745300  | MYH9   | 86.41  | 109.23 | 97.16  | 101.68 | 139.79 | 87.24  | 126.48 | 175.26 | 146.75 | 214.61 | 108.02 | 87.08  | 123.49 | 123.31  |
| chr22 | 38093596  | 38093703  | TRIOBP | 0.35   | 1.21   | 0.65   | 0.00   | 1.27   | 2.82   | 0.00   | 0.00   | 0.54   | 0.60   | 0.00   | 0.87   | 0.19   | 0.69    |
| chr22 | 38097314  | 38097486  | TRIOBP | 61.27  | 64.61  | 52.22  | 78.83  | 100.19 | 55.92  | 71.88  | 123.82 | 72.79  | 152.37 | 86.75  | 53.99  | 77.86  | 81.22   |
| chr22 | 38106435  | 38106573  | TRIOBP | 24.47  | 39.85  | 24.44  | 30.08  | 49.76  | 24.23  | 34.45  | 49.32  | 41.87  | 82.58  | 35.10  | 22.12  | 33.59  | 38.19   |
| chr22 | 38109218  | 38109418  | TRIOBP | 28.06  | 48.55  | 21.00  | 33.00  | 65.00  | 27.00  | 35.12  | 45.32  | 41.71  | 93.77  | 41.55  | 26.17  | 46.69  | 42.19   |
| chr22 | 38111771  | 38111941  | TRIOBP | 24.58  | 39.88  | 24.94  | 34.41  | 50.60  | 22.66  | 47.25  | 44.41  | 44.62  | 62.85  | 28.66  | 23.25  | 33.70  | 37.34   |
| chr22 | 38119193  | 38122510  | TRIOBP | 122.99 | 129.17 | 106.63 | 139.20 | 212.20 | 109.54 | 143.33 | 150.31 | 156.38 | 323.76 | 166.82 | 113.17 | 145.35 | 156.13  |
| chr22 | 38129306  | 38129419  | TRIOBP | 38.03  | 41.36  | 29.87  | 37.11  | 64.88  | 27.59  | 55.07  | 61.33  | 49.41  | 94.74  | 29.54  | 24.99  | 46.38  | 46.16   |
| chr22 | 38130407  | 38131449  | TRIOBP | 67.55  | 93.65  | 62.81  | 77.83  | 130.18 | 59.61  | 86.05  | 103.10 | 110.47 | 186.32 | 78.87  | 59.14  | 86.18  | 92.97   |
| chr22 | 38134650  | 38134726  | TRIOBP | 46.27  | 64.13  | 43.44  | 37.04  | 59.08  | 30.87  | 59.73  | 102.79 | 95.86  | 40.32  | 53.21  | 37.61  | 37.68  | 55.86   |
| chr22 | 38136903  | 38137039  | TRIOBP | 27.61  | 33.27  | 20.18  | 25.92  | 43.46  | 31.12  | 34.60  | 44.82  | 39.26  | 58.81  | 31.31  | 20.53  | 37.78  | 34.24   |
| chr22 | 38142246  | 38142427  | TRIOBP | 3.30   | 7.20   | 3.74   | 2.09   | 3.36   | 5.49   | 2.71   | 3.39   | 4.74   | 4.35   | 3.25   | 0.76   | 5.45   | 3.70    |
| chr22 | 38147780  | 38147835  | TRIOBP | 36.13  | 56.38  | 23.23  | 49.86  | 75.96  | 32.36  | 51.00  | 86.39  | 58.21  | 114.75 | 41.20  | 32.02  | 49.68  | 54.79   |
| chr22 | 38150885  | 38150991  | TRIOBP | 30.49  | 23.80  | 19.40  | 24.34  | 31.73  | 18.24  | 34.71  | 41.24  | 31.07  | 57.39  | 21.70  | 23.70  | 21.20  | 29.82   |
| chr22 | 38151109  | 38151197  | TRIOBP | 67.08  | 74.10  | 41.48  | 64.37  | 94.06  | 44.49  | 76.74  | 94.29  | 69.15  | 162.85 | 67.22  | 53.38  | 66.49  | 75.77   |
| chr22 | 38151558  | 38151666  | TRIOBP | 65.76  | 71.90  | 59.32  | 75.95  | 102.41 | 63.16  | 63.73  | 99.62  | 77.01  | 158.39 | 82.34  | 42.05  | 63.85  | 80.14   |
| chr22 | 38153621  | 38154145  | TRIOBP | 38.04  | 66.54  | 35.61  | 49.34  | 84.02  | 28.28  | 51.94  | 70.76  | 64.36  | 123.49 | 46.45  | 34.57  | 55.11  | 57.78   |
| chr22 | 38155162  | 38155271  | TRIOBP | 36.23  | 44.46  | 31.34  | 35.14  | 55.19  | 28.47  | 44.92  | 69.65  | 50.68  | 96.52  | 39.71  | 28.22  | 34.08  | 46.71   |
| chr22 | 38155425  | 38155534  | TRIOBP | 57.26  | 60.92  | 39.26  | 50.54  | 80.00  | 32.73  | 60.78  | 89.57  | 70.23  | 109.03 | 63.04  | 39.27  | 47.65  | 62.72   |
| chr22 | 38161678  | 38161824  | TRIOBP | 7.93   | 11.55  | 9.96   | 15.96  | 22.77  | 13.43  | 10.36  | 20.93  | 9.50   | 30.59  | 11.01  | 8.31   | 16.91  | 14.36   |
| chr22 | 38164082  | 38164183  | TRIOBP | 59.42  | 46.94  | 43.04  | 46.84  | 89.71  | 46.20  | 60.77  | 95.76  | 74.79  | 132.96 | 70.70  | 52.61  | 75.74  | 68.31   |
| chr22 | 38165036  | 38165194  | TRIOBP | 25.08  | 27.20  | 16.86  | 33.92  | 52.94  | 24.99  | 24.67  | 45.08  | 33.75  | 62.59  | 20.50  | 21.84  | 31.18  | 32.45   |
| chr22 | 38165270  | 38165382  | TRIOBP | 22.13  | 37.33  | 21.35  | 32.09  | 57.19  | 24.44  | 29.20  | 51.99  | 36.28  | 95.99  | 36.37  | 19.81  | 34.44  | 38.68   |
| chr22 | 38167658  | 38167743  | TRIOBP | 47.19  | 38.99  | 27.62  | 40.17  | 59.87  | 32.86  | 39.31  | 54.52  | 51.01  | 91.95  | 46.65  | 38.62  | 56.92  | 47.40   |
| chr22 | 38168609  | 38168771  | TRIOBP | 56.74  | 66.51  | 48.21  | 65.99  | 96.96  | 55.35  | 67.23  | 102.08 | 64.26  | 189.58 | 65.72  | 33.95  | 77.17  | 76.05   |
| chrx  | 21755668  | 21755815  | SMPX   | 41.73  | 59.64  | 16.93  | 20.48  | 26.68  | 15.51  | 72.01  | 51.06  | 72.22  | 19.69  | 26.51  | 19.58  | 41.71  | 36.84   |
| chrx  | 21761869  | 21761954  | SMPX   | 40.76  | 74.72  | 17.77  | 16.15  | 27.59  | 21.74  | 49.70  | 47.64  | 81.97  | 38.43  | 24.48  | 11.49  | 52.08  | 37.70   |
| chrx  | 21772365  | 21772420  | SMPX   | 87.52  | 113.59 | 28.20  | 36.63  | 49.25  | 27.36  | 95.80  | 73.73  | 147.34 | 14.64  | 50.13  | 28.55  | 78.63  | 62.73   |
| chrx  | 82763334  | 82764418  | POU3F4 | 76.65  | 90.81  | 35.07  | 42.52  | 65.16  | 29.98  | 96.31  | 63.38  | 103.05 | 188.91 | 41.20  | 31.43  | 90.27  | 72.04   |
| chrx  | 106871860 | 106871980 | PRPS1  | 54.36  | 104.09 | 38.42  | 34.90  | 53.04  | 30.25  | 95.56  | 74.09  | 101.32 | 156.62 | 35.12  | 26.32  | 79.29  | 67.01   |
| chrx  | 106882526 | 106882708 | PRPS1  | 104.07 | 167.46 | 51.77  | 58.03  | 78.74  | 49.84  | 220.55 | 138.78 | 221.75 | 56.34  | 80.99  | 66.79  | 124.38 | 107.93  |
| chrx  | 106884133 | 106884230 | PRPS1  | 61.27  | 88.28  | 33.06  | 26.69  | 47.60  | 18.08  | 93.99  | 76.24  | 119.69 | 20.74  | 29.70  | 32.89  | 71.72  | 54.02   |
| chrx  | 106885597 | 106885720 | PRPS1  | 68.71  | 91.95  | 22.54  | 23.98  | 47.48  | 28.66  | 97.33  | 63.32  | 100.29 | 18.80  | 39.03  | 27.67  | 68.16  | 52.48   |
| chrx  | 106888408 | 106888580 | PRPS1  | 62.14  | 96.20  | 38.08  | 35.16  | 58.30  | 38.79  | 101.72 | 62.96  | 114.87 | 135.51 | 41.05  | 30.44  | 78.42  | 67.94   |
| chrx  | 106890837 | 106890995 | PRPS1  | 81.86  | 127.36 | 40.72  | 30.48  | 50.69  | 30.78  | 140.89 | 85.01  | 131.75 | 57.56  | 45.93  | 47.34  | 70.61  | 72.53   |
| chrx  | 106893171 | 106893262 | PRPS1  | 68.92  | 116.40 | 40.82  | 40.13  | 49.01  | 41.29  | 134.98 | 88.09  | 140.20 | 22.15  | 53.73  | 43.20  | 109.95 | 69.91   |
|       |           |           |        |        |        |        |        |        |        |        |        |        |        |        |        |        | Average |
|       |           |           |        |        |        |        |        |        |        |        |        |        |        |        |        |        | 66.29   |

Uncovered regions are highlighted in gray.

**Table S5. Variants in autosomal dominant NSHL genes detected by WES in this study**

| Gene Symbol  | Individual | Sex | Age of onset | Nucleotide change <sup>a</sup> | Amino acid change | Exon (zygosity, segregation) | Amino acid sequence conservation <sup>b</sup> | Frequencies in the dbSNP database <sup>c</sup> | Frequencies in the ExAC database <sup>d</sup> | Frequencies in the NBK database <sup>e</sup> | PP2 <sup>f</sup> | MT <sup>g</sup> | PROVEAN <sup>h</sup> | SIFT <sup>i</sup> |
|--------------|------------|-----|--------------|--------------------------------|-------------------|------------------------------|-----------------------------------------------|------------------------------------------------|-----------------------------------------------|----------------------------------------------|------------------|-----------------|----------------------|-------------------|
| <b>MYO7A</b> | YUHL 26-21 | Fm  | 8 yr         | c.1094A>G                      | p.Asp365Gly       | 11 (het, M)                  | <i>D. rerio</i>                               | ND                                             | ND                                            | ND                                           | Bn (0.341)       | DC (0.999)      | Del (-3.39)          | Tol (0.307)       |
| <b>DFNA5</b> | YUHL 44-21 | MI  | 2 yr         | c.116_119del AAAA              | p.Lys39Argfs*24   | 2 (het, M)                   | NA                                            | rs773853744 (MAF: -=0.00003/4)                 | ND                                            | ND                                           | NA               | DC (1.000)      | NA                   | NA                |

Abbreviations are as follows: Bn, benign; Dam, damaging; DC, disease causing; Del, deleterious; F, heterozygous mutation identified in father; Fm, female; het, heterozygous in affected individual; M, heterozygous mutation identified in mother; MAF, minor allele frequency; MI, male; NA, not applicable; ND, no data or DNA available; Neu, neutral; PD, probably damaging; PM, Polymorphism; PP2, PolyPhen-2 prediction score Humvar; PROVEAN, Protein Variation Effect Analyzer; SIFT, Sorting Intolerant from Tolerant; SNP, single nucleotide polymorphism; Tol, tolerant; yr, years.

<sup>a</sup>cDNA mutations are numbered according to human cDNA reference sequence NM\_000260.3 (*MYO7A*), NM\_004403.2 (*DFNA5*); +1 corresponds to the A of ATG translation initiation codon. <sup>b</sup>Amino acid residue is continually conserved throughout evolution including the species as indicated. <sup>c</sup>dbSNP database (<http://www.ncbi.nlm.nih.gov/SNP>). <sup>d</sup>ExAC browser (<http://exac.broadinstitute.org/>). <sup>e</sup>National Biobank of Korea, the Centers for Disease Control and Prevention. <sup>f</sup>PolyPhen-2 prediction score HumVar ranges from 0 to 1.0; 0 = benign, 1.0 = probably damaging (<http://genetics.bwh.harvard.edu/pph2/>). <sup>g</sup>Mutation taster (<http://www.mutationtaster.org/>). <sup>h</sup>PROVEAN (<http://provean.jcvi.org/index.php>). <sup>i</sup>SIFT (<http://sift.jcvi.org/>).

**Table S6. Heterozygous variants in autosomal recessive NSHL genes detected by WES in this study**

| Individual | Gene Symbol   | Sex | Age of onset | Nucleotide change <sup>a</sup> | Amino acid change | Exon        | Amino acid sequence conservation <sup>b</sup> | Frequencies in the dbSNP database <sup>c</sup> | Frequencies in the ExAC database <sup>d</sup> | Frequencies in the NBK database <sup>e</sup> | PP2 <sup>f</sup> | MT <sup>g</sup> | PROVEAN <sup>h</sup> | SIFT        |
|------------|---------------|-----|--------------|--------------------------------|-------------------|-------------|-----------------------------------------------|------------------------------------------------|-----------------------------------------------|----------------------------------------------|------------------|-----------------|----------------------|-------------|
| YUHL 13-21 | <i>LOXHD1</i> | MI  | 1 yr         | c.3185C>T                      | p.Ser1062Leu      | 20          | <i>D. rerio</i>                               | ND                                             | ND                                            | ND                                           | PD (0.993)       | DC (0.672)      | Del (-4.43)          | Dam (0.004) |
|            | <i>GIPC3</i>  | MI  | 1 yr         | c.58C>T                        | p.Pro20Ser        | 1           | <i>M. musculus</i>                            | ND                                             | ND                                            | ND                                           | Bn (0.003)       | DC (0.945)      | Neu (-0.21)          | Tol (0.249) |
| YUHL 20-21 | <i>LOXHD1</i> | MI  | 2 yr         | c.1810-2A>T                    | NA                | 13 (intron) | ND                                            | ND                                             | ND                                            | A:0.00125945                                 | NA               | DC (1.000)      | NA                   | NA          |
|            | <i>GRXCR2</i> | MI  | 2 yr         | c.88C>T                        | p.Arg30*          | 1           | ND                                            | ND                                             | ND                                            | ND                                           | NA               | DC (1.000)      | NA                   | NA          |
| YUHL 14-21 | <i>PCDH15</i> | Fm  | 5 yr         | c.4703A>G                      | p.Lys1568Arg      | 35          | <i>X. tropicalis</i>                          | rs774523472 (C=0.00002/3)                      | 3/120774 (no hom)                             | ND                                           | Bn (0.149)       | PM (0.956)      | Neu (-0.18)          | Dam (0.023) |
| YUHL 26-21 | <i>MYO3A</i>  | Fm  | 8 yr         | c.2902G>A                      | p.Val968Ile       | 26          | <i>D. rerio</i>                               | rs747578242 (A=0.000008/1)                     | 1/121398 (no hom)                             | ND                                           | PD (0.971)       | DC (0.999)      | Neu (-0.82)          | Dam (0.045) |
| YUHL 36-21 | <i>TSPEAR</i> | Fm  | 4 yr         | c.1144A>G                      | p.Lys382Glu       | 7           | <i>D. rerio</i>                               | rs782103811 (C=0.000008/1)                     | 1/121366 (no hom)                             | C:0.00251889                                 | Bn (0.225)       | PM (0.908)      | Neu (-1.10)          | Tol (0.297) |
| YUHL 44-21 | <i>KARS</i>   | MI  | 2 yr         | c.1450T>G                      | p.Cys484Gly       | 12          | <i>D. rerio</i>                               | rs772704062 (C=0.000008/1)                     | 1/121136 (no hom)                             | ND                                           | PD (0.989)       | DC (0.999)      | Del (-9.11)          | Dam (0.01)  |
|            | <i>FAM65B</i> | MI  | 2 yr         | c.3176G>A                      | p.Arg1059His      | 23          | <i>M. musculus</i>                            | rs753906236 (T=0.00009/2)                      | 2/21828 (no hom)                              | ND                                           | Bn (0.023)       | DC (0.992)      | Neu (-0.85)          | Tol (0.1)   |

Abbreviations are as follows: Bn, benign; Dam, damaging; DC, disease causing; Del, deleterious; F, heterozygous mutation identified in father; Fm, female; het, heterozygous in affected individual; M, heterozygous mutation identified in mother; MAF, minor allele frequency; MI, male; mo, month; NA, not applicable; ND, no data or DNA available; Neu, neutral; PD, probably damaging; PM, Polymorphism; PP2, PolyPhen-2 prediction score Humvar; PROVEAN, Protein Variation Effect Analyzer; SIFT, Sorting Intolerant from Tolerant; SNP, single nucleotide polymorphism; Tol, tolerant; yr, years.

<sup>a</sup>cDNA mutations are numbered according to human cDNA reference sequence NM\_144612.6 (*LOXHD1*), NM\_133261.2 (*GIPC3*), NM\_001142763.1 (*PCDH15*), NM\_001080516.1 (*GRXCR2*), NM\_017433.4 (*MYO3A*), NM\_144991.2 (*TSPEAR*), NM\_001130089.1 (*KARS*), NM\_014722.3 (*FAM65B*); +1 corresponds to the A of ATG translation initiation codon. <sup>b</sup>Amino acid residue is continually conserved throughout evolution including the species as indicated. <sup>c</sup>dbSNP database (<http://www.ncbi.nlm.nih.gov/SNP>). <sup>d</sup>ExAC browser (<http://exac.broadinstitute.org/>). <sup>e</sup>National Biobank of Korea, the Centers for Disease Control and Prevention. <sup>f</sup>PolyPhen-2 prediction score HumVar ranges from 0 to 1.0; 0 = benign, 1.0 = probably damaging (<http://genetics.bwh.harvard.edu/pph2/>). <sup>g</sup>Mutation taster (<http://www.mutationtaster.org/>). <sup>h</sup>PROVEAN (<http://provean.jcvi.org/index.php>). <sup>i</sup>SIFT (<http://sift.jcvi.org/>).



**Table S7. Candidate genes identified in 10 affected individuals in whom a causative mutation in 72 known NSHL genes is excluded.**

|              | Mutation type | Gene symbol       | Alteration (phys. Location)       | Accession #    | cDNA position       | Amino acid substitution | Count | Coverage | Conservation |    |    |                          | dbSNP                     | EXAC Population Frequencies | EVS                 | NBK Allele frequency | Mutation Taster | PP2 Humvar                | PROVEAN                   | SIFT                      | OMIM        |             |
|--------------|---------------|-------------------|-----------------------------------|----------------|---------------------|-------------------------|-------|----------|--------------|----|----|--------------------------|---------------------------|-----------------------------|---------------------|----------------------|-----------------|---------------------------|---------------------------|---------------------------|-------------|-------------|
|              |               |                   |                                   |                |                     |                         |       |          | Mm           | Gg | Xt | Dr                       |                           |                             |                     |                      |                 |                           |                           |                           |             |             |
| YUHL 10-21   | Compound Het  | CSMD3             | chr8:113662447C>T                 | NM_198123      | c.3136G>A           | p.Glu1046Lys            | 25    | 54       | E            | E  | D  | E                        | rs368870291 (NA)          | 3/121404 (no hom)           | TT=0/TC=1/CC=6502   | No                   | DC (0.999)      | Possibly Damaging (0.728) | Del (-3.30)               | Tol (0.068)               | No          |             |
|              |               |                   | chr8:114111156C>T                 | NM_198123      | c.746G>A            | p.Ser249Asn             | 51    | 110      | S            | S  | S  | S                        | rs73701331 (T=0.0094/47)  | 304/120722 (2 hom)          | TT=2/TC=103/CC=6398 | T:0.00125945         | DC (0.9257)     | Possibly Damaging (0.985) | Neu (-1.48)               | Tol (0.146)               | No          |             |
|              | Compound Het  | SPATC1            | chr8:145094836G>C                 | NM_198572      | c.238G>C            | p.Val80Leu              | 32    | 62       | A            |    |    |                          | rs191614050 (C=0.0020/10) | 137/120552 (2 hom)          | No                  | C:0.0214106          | PM (0.9995)     | Benign (0.001)            | Neu (-0.50)               | Tol (0.063)               | No          |             |
|              |               |                   | chr8:145095523T>A                 | NM_198572      | c.821T>A            | p.Met274Lys             | 68    | 129      |              |    |    |                          | No                        | 3/117988 (no hom)           | No                  | A:0.00125945         | PM (0.9999)     | Benign (0.022)            | Neu (-1.32)               | Tol (0.071)               | No          |             |
|              | De novo       | PITRM1            | chr10:3212294A>G                  | NM_001242307.1 | c.159*2T>C          |                         | 19    | 41       |              |    |    |                          | No                        | No                          | No                  | No                   | DC (1)          | No                        | No                        | No                        | No          |             |
|              | De novo       | TYW5              | chr2:200803702A>C                 | NM_001039693.2 | c.440T>G            | p.Val147Gly             | 15    | 27       | V            | V  | V  | V                        | No                        | No                          | No                  | No                   | No              | DC (0.999)                | Probably Damaging (0.997) | Del (-5.62)               | Dam (0)     | No          |
|              | De novo       | OLFM4             | chr13:53624689T>C                 | NM_006418.4    | c.1316T>C           | p.Val439Ala             | 45    | 83       | V            | V  | V  | V                        | No                        | No                          | No                  | No                   | No              | DC (0.999)                | Probably Damaging (0.996) | Del (-3.95)               | Dam (0.003) | No          |
|              | De novo       | RALGAP1           | chr14:36104800A>G                 | NM_194301.3    | c.4163T>C           | p.Val1388Ala            | 8     | 14       | V            | V  | V  | V                        | No                        | No                          | No                  | No                   | No              | DC (0.999)                | Probably Damaging (0.923) | Del (-2.9)                | Dam (0.004) | No          |
|              | De novo       | C14orf37          | chr14:58563541G>A                 | NM_001001872.3 | c.1990C>T           | p.Gln664*               | 25    | 63       | Q            | Q  | Q  |                          | No                        | No                          | No                  | No                   | No              | DC (0.999)                | No                        | No                        | No          | No          |
| De novo      | CORO2B        | chr15:68987480C>T | NM_006091.4                       | c.218C>T       | p.Thr73Ile          | 30                      | 68    | T        | T            | T  | F  | No                       | No                        | No                          | No                  | No                   | DC (0.997)      | Possibly Damaging (0.464) | Del (-5.08)               | Dam (0.004)               | No          |             |
| De novo      | AHNAK         | chr11:62295239T>A | NM_001620.2                       | c.6650A>T      | p.Asp2217Val        | 49                      | 95    | V        | E            | K  |    | No                       | No                        | No                          | No                  | No                   | PM (0.738)      | Possibly Damaging (0.809) | Del (-5.88)               | Dam (0.032)               | No          |             |
| De novo      | RARRES3       | chr11:63312273T>C | NM_004585.4                       | c.299T>C       | p.Val100Ala         | 28                      | 58    | I        |              | I  | L  | No                       | No                        | No                          | No                  | No                   | PM (0.999)      | Possibly Damaging (0.851) | Del (-3.7)                | Dam (0.003)               | No          |             |
| YUHL 14-21   | Compound Het  | KDEL2C            | chr11:108352754G>A                | NM_153705      | c.880C>T            | p.Leu294Phe             | 29    | 56       | L            | L  | L  | L                        | rs75859794 (A=0.0006/3)   | 16/120542 (no hom)          | No                  | A:0.00377834         | DC (0.999)      | Possibly Damaging (0.534) | Del (-2.97)               | Dam (0.043)               | No          |             |
|              |               |                   | chr11:108356955G>A                | NM_153705      | c.613C>T            | p.Arg205Trp             | 19    | 35       | R            | R  | R  | R                        | rs778413475 (NA)          | 6/120752 (no hom)           | No                  | No                   | No              | DC (0.999)                | Probably Damaging (1.000) | Del (-6.27)               | Dam (0.011) | No          |
|              | Compound Het  | ARHGEF18          | chr19:7506873C>T                  | NM_001130955   | c.731C>T            | p.Ala244Val             | 18    | 40       | S            | A  | A  | A                        | rs200966278 (T=0.0004/2)  | 23/121366 (no hom)          | No                  | No                   | No              | PM (0.999)                | Benign (0.017)            | Neu (-0.80)               | Tol (1.00)  | No          |
|              |               |                   | chr19:7523482G>A                  | NM_001130955   | c.1702G>A           | p.Ala568Thr             | 27    | 57       | A            | A  | A  | A                        | rs370503507 (NA)          | 8/121388 (no hom)           | No                  | No                   | No              | DC (0.999)                | Possibly Damaging (0.765) | Del (-3.04)               | Dam (0.014) | No          |
|              | Compound Het  | GPR151            | chr5:145895095..145895099delCACAG | NM_194251      | c.578_582delCTGTG   | p.Ala193Glyfs*2         | 32    | 72       | V            |    | H  | H                        | rs751873529 (NA)          | No                          | No                  | No                   | No              | DC (1.000)                | No                        | No                        | No          | No          |
|              |               |                   | chr5:145895102..145895105delGGTA  | NM_194251      | c.572_575delTACC    | p.Val191Glyfs*59        | 32    | 71       | P            |    | P  | P                        | rs762221581 (NA)          | No                          | No                  | No                   | No              | No                        | DC (1.000)                | No                        | No          | No          |
| Compound Het | DAB2IP        | chr9:124329505A>G | NM_032552                         | c.38A>G        | p.Tyr13Cys          | 31                      | 56    | Y        | N            |    |    | No                       | No                        | No                          | No                  | No                   | PM (0.991)      | Benign (0.000)            | Neu (-0.86)               | Dam (0.02)                | No          |             |
|              |               | chr9:124535604G>A | NM_032552                         | c.2713G>A      | p.Gly905Ser         | 9                       | 18    | G        |              | G  | G  | rs201889776 (A=0.0006/3) | 5/11046 (no hom)          | No                          | No                  | No                   | No              | DC (0.999)                | Probably Damaging (0.949) | Neu (-1.17)               | Tol (0.138) | No          |
| YUHL 20-21   | De novo       | IDE               | chr10:94230099A>C                 | NM_004969.3    | c.2120T>G           | p.Val707Gly             | 62    | 109      | V            | V  | V  | V                        | No                        | No                          | No                  | No                   | No              | DC (0.999)                | possibly damaging (0.799) | Del (-4.89)               | Dam (0.001) | No          |
|              | De novo       | MYO1B             | chr2:192234274T>C                 | NM_001130158.2 | c.1039T>C           | p.Tyr347His             | 11    | 23       | Y            | Y  |    | Y                        | No                        | No                          | No                  | No                   | No              | DC (0.999)                | Probably Damaging (0.997) | Del (-4.39)               | Dam (0.011) | No          |
|              | De novo       | WDR75             | chr2:190306288T>G                 | NM_032168.2    | c.70T>G             | p.Phe24Val              | 44    | 89       | F            |    | F  | I                        | No                        | No                          | No                  | No                   | No              | DC (0.999)                | Possibly Damaging (0.515) | Del (-4.23)               | Dam (0.007) | No          |
|              | De novo       | FAM198A           | chr3:43097017G>A                  | NM_001129908.2 | c.1507G>A           | p.Gly503Ser             | 17    | 35       | G            |    | G  |                          | No                        | No                          | No                  | No                   | No              | DC (0.999)                | Probably Damaging (1)     | Del (-5.66)               | Dam (0)     | No          |
|              | De novo       | WDR49             | chr3:167250724C>T                 | NM_178824.3    | c.940G>A            | p.Glu314Lys             | 46    | 82       | E            |    | E  |                          | No                        | No                          | No                  | No                   | No              | DC (0.912)                | possibly damaging (0.78)  | Del (-2.95)               | Dam (0.006) | No          |
| De novo      | FXYD1         | chr19:35632062C>T | NM_005031.4                       | c.121C>T       | p.Leu41Phe          | 48                      | 88    | L        |              |    |    | No                       | No                        | No                          | No                  | No                   | DC (0.999)      | probably damaging (0.999) | Del (-3.65)               | Dam (0.003)               | No          |             |
| YUHL 21-21   | Compound Het  | OBSCN             | chr1:228399851G>A                 | NM_001271223   | c.367G>A            | p.Glu123Lys             | 44    | 82       | E            | L  | L  | L                        | rs377006803 (A=0.0007/7)  | 7/10664 (no hom)            | AA=0/AG=1/CG=4340   | No                   | No              | PM (0.999)                | Possibly Damaging (0.725) | Neu (-0.63)               | Tol (0.646) | No          |
|              |               |                   | chr1:228471318G>A                 | NM_001271223   | c.8852G>A           | p.Gly2951Asp            | 92    | 188      | G            | G  | G  | G                        | rs184062354 (A=0.00005/6) | 6/119754 (no hom)           | No                  | No                   | No              | No                        | PM (0.999)                | Probably Damaging (0.935) | Del (-3.89) | Tol (0.230) |
| YUH 25-21    | Hemi          | SPANXC            | chrX:140335705..140335706AG>TC    | NM_022661.3    | c.238_239delCTinsGA | p.Leu80Asp              | 11    | 14       |              |    |    |                          | No                        | No                          | No                  | No                   | No              | PM (0.999)                | Benign (0.007)            | Del (-4.45)               | Tol (0.107) | No          |
| YUHL 26-21   | De novo       | TMEM87A           | chr15:42510532..42510534delAGA    | NM_015497.4    | c.1582_1584delTCT   | p.Ser528del             | 34    | 75       | S            | S  | S  | S                        | No                        | No                          | No                  | No                   | No              | DC (0.999)                | No                        | Del (-11.89)              | No          | No          |
|              | De novo       | SLC24A6           | chr12:113758672G>A                | NM_024959.3    | c.403C>T            | p.Leu135Phe             | 34    | 63       | L            | L  | L  | L                        | No                        | No                          | No                  | No                   | No              | DC (0.999)                | Probably Damaging (0.999) | Del (-3.05)               | Dam (0.025) | No          |
|              | De novo       | MYH7B             | chr20:33575448G>C                 | NM_020884.4    | c.1362G>C           | p.Glu454Asp             | 40    | 86       | E            | E  | E  | E                        | No                        | No                          | No                  | No                   | No              | DC (0.998)                | Probably Damaging (0.971) | Del (-2.58)               | Dam (0.005) | No          |
|              | De novo       | COL24A1           | chr1:86249806delG                 | NM_152890.5    | c.4211delC          | p.Pro1404Glnfs*36       | 73    | 133      | P            | P  | P  | Q                        | No                        | No                          | No                  | No                   | No              | DC (1)                    | No                        | No                        | No          | No          |

|                 |               |                    |                                 |                    |                     |                      |             |     |    |   |   |                              |                       |    |    |            |                           |                           |                           |             |             |    |
|-----------------|---------------|--------------------|---------------------------------|--------------------|---------------------|----------------------|-------------|-----|----|---|---|------------------------------|-----------------------|----|----|------------|---------------------------|---------------------------|---------------------------|-------------|-------------|----|
|                 | De novo       | NOP16              | chr5:175812232..175812233TC>AT  | NM_001256539.3     | c.382_383delGAlnsAT | p.Glu128Met          | 22          | 43  | E  | E | E |                              | No                    | No | No | No         | DC (0.999)                | Probably Damaging (0.991) | Del (-6.19)               | Dam (0.001) | No          |    |
|                 | De novo       | COL21A1            | chr6:56021708G>A                | NM_030820.3        | c.1411C>T           | p.Gln471*            | 43          | 88  |    |   | Q |                              | No                    | No | No | No         | DC (1)                    | No                        | No                        | No          | No          |    |
|                 | De novo       | IL20RA             | chr6:13733047A>A                | NM_014432.3        | c.559A>T            | p.Asn187Tyr          | 74          | 153 | N  | K |   |                              | No                    | No | No | No         | PM (0.997)                | Probably Damaging (0.987) | Del (-6.78)               | Dam (0.003) | No          |    |
| YUHL<br>36-21   | De novo       | CTNND2             | chr5:11159721G>A                | NM_001332.3        | c.2126C>T           | p.Ser709Leu          | 28          | 46  | S  | S | S | S                            | No                    | No | No | No         | DC (0.999)                | Probably Damaging (0.991) | Del (-4.55)               | Dam (0.002) | No          |    |
|                 | De novo       | NCOR2              | chr12:124824618A>G              | NM_006312.5        | c.5621T>C           | p.Val1874Ala         | 19          | 39  | V  | V | V | V                            | No                    | No | No | No         | DC (0.999)                | Probably Damaging (0.984) | Del (-3.8)                | Dam (0)     | No          |    |
|                 | De novo       | C2CD2              | chr21:4333833C>G                | NM_015500.1        | c.598-1G>C          |                      |             | 19  | 35 |   |   |                              |                       | No | No | No         | No                        | DC (0.999)                | No                        | No          | No          | No |
|                 | De novo       | TMEM192            | chr4:166021908C>T               | NM_001100389.1     | c.311G>A            | p.Trp104*            | 75          | 148 | W  | W | W |                              | No                    | No | No | No         | DC (1)                    | No                        | No                        | No          | No          |    |
|                 | De novo       | SLC44A5            | chr1:75669500T>C                | NM_152697.4        | c.2066A>G           | p.Asn689Ser          | 40          | 80  | N  | W | N | N                            | No                    | No | No | No         | DC (0.999)                | Probably Damaging (0.987) | Del (-4.94)               | Dam (0)     | No          |    |
|                 | De novo       | PRSS3              | chr9:33797856A>G                | NM_007343.3        | c.401A>G            | p.Asn134Ser          | 57          | 92  |    | N | N | N                            | No                    | No | No | No         | DC (0.999)                | Possibly Damaging (0.631) | Del (-4.27)               | Dam (0.006) | No          |    |
|                 | De novo       | ZNF823             | chr19:11832671A>G               | NM_001080493.3     | c.1678T>C           | p.Cys560Arg          | 71          | 188 |    | C | C | C                            | No                    | No | No | No         | DC (0.998)                | Probably Damaging (0.999) | Del (-9.38)               | Dam (0)     | No          |    |
|                 | De novo       | DNAH8              | chr6:38794121T>C                | NM_001206927.1     | c.4037T>C           | p.Ile1346Thr         | 31          | 74  | I  | I |   |                              | No                    | No | No | No         | DC (0.999)                | Possibly Damaging (0.821) | Del (-4.18)               | Dam (0.001) | No          |    |
|                 | De novo       | GPLD1              | chr6:24476461A>G                | NM_001503.3        | c.278T>C            | p.Leu93Pro           | 31          | 53  | L  |   | L |                              | No                    | No | No | No         | DC (0.999)                | Probably Damaging (1)     | Del (-5.17)               | Dam (0.001) | No          |    |
|                 | De novo       | ARHGEF11           | chr1:156941593A>G               | NM_198236.2        | c.598T>C            | p.Tyr200His          | 24          | 42  | Y  |   | Y |                              | No                    | No | No | No         | PM (0.578)                | Possibly Damaging (0.861) | Del (-2.52)               | Dam (0.016) | No          |    |
|                 | De novo       | MEDAG              | chr13:31480737G>T               | NM_032849.3        | c.85G>T             | p.Asp29Tyr           | 18          | 34  | D  |   |   |                              | No                    | No | No | No         | DC (0.809)                | Probably Damaging (0.984) | Del (-3.93)               | Dam (0.006) | No          |    |
|                 | De novo       | OR4N5              | chr14:20612394C>T               | NM_001004724.1     | c.500C>T            | p.Pro167Leu          | 50          | 96  |    | D | T | S                            | No                    | No | No | No         | DC (0.990)                | Probably Damaging (1)     | Del (-9.87)               | Dam (0)     | No          |    |
|                 | De novo       | ZNF208             | chr19:22171636T>A               | NM_007153.3        | c.79A>T             | p.Asn27Tyr           | 165         | 320 |    |   |   |                              | No                    | No | No | No         | PM (0.999)                | Probably Damaging (0.916) | Del (-3.93)               | Dam (0.011) | No          |    |
|                 | YUHL<br>40-21 | De novo            | ANKRD13A                        | chr12:110461907A>G | NM_033121.1         | c.791A>G             | p.Tyr264Cys | 11  | 25 | Y | Y | Y                            | Y                     | No | No | No         | No                        | DC (0.999)                | Probably Damaging (0.969) | Del (-7.56) | Dam (0.001) | No |
| De novo         |               | SUMF2              | chr7:56141878G>A                | NM_015411.2        | c.408G>A            | p.Trp136*            | 19          | 35  | W  | W | W | W                            | No                    | No | No | No         | DC (1)                    | No                        | No                        | No          | No          |    |
| De novo         |               | ZNF652             | chr17:47388672A>G               | NM_001145365.1     | c.1309+2T>C         |                      |             | 14  | 40 |   |   |                              |                       | No | No | No         | No                        | DC (1)                    | No                        | No          | No          | No |
| De novo         |               | PMS1               | chr2:190718725*190718726insGTA  | NM_000534.4        | c.883_884insGTA     | p.Phe295delinsCyslle | 11          | 22  | F  | F | F |                              | No                    | No | No | No         | PM (0.999)                | No                        | Del (-9.53)               | No          | No          |    |
| De novo         |               | KIAA1549           | chr7:138583842G>C               | NM_001164665.1     | c.3706C>G           | p.Pro1236Ala         | 36          | 71  | P  | P | P | P                            | No                    | No | No | No         | DC (0.999)                | Probably Damaging (1)     | Del (-7.58)               | Dam (0.003) | No          |    |
| De novo         |               | TOR2A              | chr9:130494926C>T               | NM_001085347.2     | c.638G>A            | p.Trp213*            | 33          | 68  | W  | W | W | R                            | No                    | No | No | No         | DC (1)                    | No                        | No                        | No          | No          |    |
| De novo         |               | SVEP1              | chr9:113137662G>T               | NM_153366.3        | c.10586C>A          | p.Ser3529Tyr         | 29          | 68  | S  | S | S | T                            | No                    | No | No | No         | DC (0.999)                | Possibly Damaging (0.837) | Del (-3.3)                | Dam (0.004) | No          |    |
| De novo         | GRM3          | chr7:86394915A>G   | NM_000840.2                     | c.454A>G           | p.Ser152Gly         | 48                   | 87          | S   | S  | D | S | No                           | No                    | No | No | DC (0.999) | Possibly Damaging (0.641) | Del (-2.99)               | Dam (0.033)               | No          |             |    |
| YUHL<br>43-21   | De novo       | CCNI               | chr4:77976319A>C                | NM_006835.2        | c.674T>G            | p.Leu225Arg          | 32          | 64  | L  | L | L | L                            | No                    | No | No | No         | DC (0.999)                | Probably Damaging (0.988) | Del (-5.36)               | Dam (0)     | No          |    |
|                 | De novo       | FAM172A            | chr5:93217372A>G                | NM_032042.5        | c.590T>C            | p.Leu197Pro          | 15          | 26  | L  | L | L | L                            | No                    | No | No | No         | DC (0.999)                | Probably Damaging (0.985) | Del (-4.87)               | Dam (0.024) | No          |    |
|                 | De novo       | C11orf31           | chr11:57509638..57509639delAT   | NM_170746.3        | c.318_319delAT      | p.Lys106Asnfs*3      | 8           | 18  | K  | K |   |                              | No                    | No | No | No         | DC (1)                    | No                        | No                        | No          | No          |    |
|                 | De novo       | PARP14             | chr3:122420433*122420434insG    | NM_017554.2        | c.3032_3033insG     | p.Gly1013Argfs*15    | 24          | 54  | P  |   | K |                              | No                    | No | No | No         | DC (1)                    | No                        | No                        | No          | No          |    |
|                 | De novo       | MELTF              | chr3:196743107C>T               | NM_005929.5        | c.1034G>A           | p.Gly345Asp          | 18          | 40  | G  | G | G |                              | No                    | No | No | No         | DC (0.999)                | Probably Damaging (0.998) | Del (-6.84)               | Dam (0)     | No          |    |
|                 | De novo       | SLC27A6            | chr5:128301847*128301848insAACA | NM_001017372.2     | c.17_18insAACA      | p.Val8Apnfs*24       | 18          | 31  | L  | V | I | I                            | No                    | No | No | No         | DC (1)                    | No                        | No                        | No          | No          |    |
|                 | De novo       | ELMO3              | chr16:67233603*67233604insC     | NM_024712.3        | c.295_296insC       | p.Glu100*            | 25          | 34  | P  | A | S | P                            | No                    | No | No | No         | DC (1)                    | No                        | No                        | No          | No          |    |
| De novo         | OAS2          | chr12:113445732C>A | NM_016817.2                     | c.1879C>A          | p.Gln627Lys         | 20                   | 37          | Q   |    |   |   | No                           | No                    | No | No | PM (0.527) | Probably Damaging (0.957) | Del (-3.91)               | Dam (0.005)               | No          |             |    |
| Compound<br>Het | HEATR1        | chr1:236740100C>T  | NM_018072.5                     | c.2905G>A          | p.Asp969Asn         | 18                   | 37          | D   | D  | D | D | rs141424510<br>(T=0.0002/20) | 20/120224<br>(no hom) | No | No | No         | DC (0.999)                | Probably Damaging (0.442) | Del (-4.18)               | Tol (0.311) | No          |    |
|                 |               | chr1:236762924C>T  | NM_018072.5                     | c.360G>A           |                     | 35                   | 78          |     |    |   |   | rs200399414<br>(T=0.00002/3) | 3/120376<br>(no hom)  | No | No | No         | DC (1)                    | No                        | Neu (0)                   | Tol (1)     | No          |    |
| Hemi            | SLC25A14      | chrX:12950596G>A   | NM_001282197.1                  | c.998G>A           | p.Arg333Gln         | 13                   | 13          | R   |    | R | R | No                           | No                    | No | No | No         | Probably Damaging (0.972) | Del (-3.43)               | Dam (0)                   | No          |             |    |

|               |         |          |                   |                |            |              |    |    |   |   |   |   |    |    |    |    |            |                           |             |             |    |
|---------------|---------|----------|-------------------|----------------|------------|--------------|----|----|---|---|---|---|----|----|----|----|------------|---------------------------|-------------|-------------|----|
| YUHL<br>44-21 | Hemi    | SSX3     | chr:48213531T>C   | NM_021014.3    | c.185-2A>G |              | 50 | 50 |   |   |   |   | No | No | No | No | PM (0.989) | No                        | No          | No          | No |
|               | De novo | CAND2    | chr3:12858190G>A  | NM_001162499.1 | c.1759G>A  | p.Val587Met  | 22 | 49 | V | V | V | V | No | No | No | No | DC (0.999) | Probably Damaging (0.997) | Del (-2.88) | Dam (0)     | No |
|               | De novo | DOPEY2   | chr21:37653848G>C | NM_005128.3    | c.6099G>C  | p.Gln2033His | 34 | 76 | Q | Q | Q | Q | No | No | No | No | DC (0.999) | Probably Damaging (0.998) | Del (-2.8)  | Dam (0.008) | No |
|               | De novo | ADAMTSL3 | chr15:84506875C>G | NM_207517.2    | c.635C>G   | p.Ala212Gly  | 17 | 40 | A | A | A | A | No | No | No | No | DC (0.999) | Probably Damaging (0.994) | Del (-2.88) | Dam (0)     | No |
|               | De novo | SWI5     | chr9:131050954A>G | NM_001040011.1 | c.667A>G   | p.Lys223Glu  | 21 | 36 | K |   |   |   | No | No | No | No | DC (0.961) | Probably Damaging (0.975) | Del (-2.8)  | Dam (0.012) | No |
|               | De novo | CEND1    | chr11:788449T>C   | NM_016564.3    | c.128A>G   | p.Glu43Gly   | 6  | 16 | D |   |   | D | No | No | No | No | DC (0.819) | Possibly Damaging (0.466) | Del (-4.83) | Dam (0.005) | No |

**Table S8. Number of copy number variation detected by EXCAVATOR and ExomeDepth**

| #              | Family ID | EXCAVATOR |                     | ExomeDepth |                     |
|----------------|-----------|-----------|---------------------|------------|---------------------|
|                |           | CNV       | biallelic deletions | CNV        | biallelic deletions |
| 1              | YUHL8     | 111       | 4                   | 168        | 3                   |
| 2              | YUHL10    | 138       | 5                   | 185        | 8                   |
| 3              | YUHL13    | 142       | 9                   | 185        | 8                   |
| 4              | YUHL14    | 99        | 5                   | 181        | 7                   |
| 5              | YUHL20    | 144       | 3                   | 184        | 10                  |
| 6              | YUHL21    | 95        | 2                   | 113        | 1                   |
| 7              | YUHL24    | 112       | 10                  | 148        | 5                   |
| 8              | YUHL25    | 132       | 8                   | 121        | 5                   |
| 9              | YUHL26    | 121       | 9                   | 190        | 9                   |
| 10             | YUHL36    | 112       | 5                   | 176        | 9                   |
| 11             | YUHL40    | 148       | 12                  | 151        | 10                  |
| 12             | YUHL43    | 139       | 9                   | 114        | 5                   |
| 13             | YUHL44    | 144       | 6                   | 135        | 6                   |
| <b>Average</b> |           | 125.92    | 6.69                | 157.77     | 6.62                |
